# Supplementary material for: Synthesis of novel derivatives of 5-hydroxymethylcytosine and 5-formylcytosine as tools for epigenetics
Source: publisher site journal article supplement (doi:10.3762/bjoc.10.2), 2014-01-03

## Supporting Information

for

# Synthesis of novel derivatives of 5-hydroxymethylcytosine and 5-formylcytosine as tools for epigenetics

Anna Chentsova, Era Kapourani and Athanassios Giannis\*

Address: Institut für Organische Chemie, Fakultät für Chemie und Mineralogie, Universität Leipzig, Johannisallee 29, 04103 Leipzig, Germany

Email: Athanassios Giannis - giannis@uni-leipzig.de

\* Corresponding author

## Experimental details and analytical data of all synthesized compounds

### Table of Contents

|                                                                                                                                                                                                                                  |     |
|----------------------------------------------------------------------------------------------------------------------------------------------------------------------------------------------------------------------------------|-----|
| General experimental methods: .....                                                                                                                                                                                              | S3  |
| 3',5'-Di( <i>tert</i> -butyldimethylsilyl)-5-(1-hydroxyethyl)-2'-deoxycytidine ( <b>2a</b> ) .....                                                                                                                               | S4  |
| 5-(1-Hydroxyethyl)-2'-deoxycytidine ( <b>3a</b> ).....                                                                                                                                                                           | S5  |
| 3',5'-Di( <i>tert</i> -butyldimethylsilyl)-5-(1-hydroxy-3-(trimethylsilyl)prop-2-ynyl)-2'-deoxycytidine ( <b>2b</b> ) and 3',5'-( <i>tert</i> -butyldimethylsilyl)-5-(1-hydroxyprop-2-ynyl)-2'-deoxycytidine ( <b>2e</b> ) ..... | S5  |
| 5-(1-Hydroxyprop-2-ynyl)-2'-deoxycytidine ( <b>3b</b> ) .....                                                                                                                                                                    | S7  |
| 3',5'-Di( <i>tert</i> -butyldimethylsilyl)-5-(1-hydroxy-3-phenylprop-2-ynyl)-2'-deoxycytidine ( <b>2c</b> ) .....                                                                                                                | S8  |
| 5-(1-Hydroxy-3-phenylprop-2-ynyl)-2'-deoxycytidine ( <b>3c</b> ) .....                                                                                                                                                           | S9  |
| 3',5'-Di( <i>tert</i> -butyldimethylsilyl)-5-(1-hydroxyprop-2-enyl)-2'-deoxycytidine ( <b>2d</b> ) .....                                                                                                                         | S9  |
| 5-(1-Hydroxyprop-2-enyl)-2'-deoxycytidine ( <b>3d</b> ).....                                                                                                                                                                     | S10 |

|                                                                                                                                                                                                                                                                                                                                                                                                                                                                                              |     |
|----------------------------------------------------------------------------------------------------------------------------------------------------------------------------------------------------------------------------------------------------------------------------------------------------------------------------------------------------------------------------------------------------------------------------------------------------------------------------------------------|-----|
| 3',5'-Di( <i>tert</i> -butyldimethylsilyl)- <i>N</i> <sup>4</sup> -(2,2,2-trichloro- <i>tert</i> -butyloxycarbonyl)-5-formyl-2'-deoxycytidine ( <b>4</b> ) .....                                                                                                                                                                                                                                                                                                                             | S11 |
| 3',5'-Di( <i>tert</i> -butyldimethylsilyl)- <i>N</i> <sup>4</sup> , <i>N</i> <sup>4</sup> -bis(2,2,2-trichloro- <i>tert</i> -butyloxycarbonyl)-5-formyl-2'-deoxycytidine ( <b>5</b> ).....                                                                                                                                                                                                                                                                                                   | S12 |
| 3',5'-Di( <i>tert</i> -butyldimethylsilyl)- <i>N</i> <sup>4</sup> -(2,2,2-trichloro- <i>tert</i> -butyloxycarbonyl)-5-(1-hydroxyethyl)-2'-deoxycytidine ( <b>6a</b> ) and 6-((2 <i>R</i> ,4 <i>S</i> ,5 <i>R</i> )-4-( <i>tert</i> -butyldimethylsilyloxy)-5-(( <i>tert</i> -butyldimethylsilyloxy)methyl)tetrahydrofuran-2-yl)-4-methyl-1 <i>H</i> -pyrimido[4,5- <i>d</i> ][1,3]oxazine-2,7(4 <i>H</i> ,6 <i>H</i> )-dione ( <b>7a</b> ) .....                                             | S13 |
| 3',5'-Di( <i>tert</i> -butyldimethylsilyl)- <i>N</i> <sup>4</sup> -(2,2,2-trichloro- <i>tert</i> -butyloxycarbonyl)-5-(1-hydroxy-3-(trimethylsilyl)prop-2-ynyl)-2'-deoxycytidine ( <b>6b</b> ) and 6-((2 <i>R</i> ,4 <i>S</i> ,5 <i>R</i> )-4-( <i>tert</i> -butyldimethylsilyloxy)-5-(( <i>tert</i> -butyldimethylsilyloxy)methyl)tetrahydrofuran-2-yl)-4-((trimethylsilyl)ethynyl)-1 <i>H</i> -pyrimido[4,5- <i>d</i> ][1,3]oxazine-2,7(4 <i>H</i> ,6 <i>H</i> )-dione ( <b>7b</b> ) ..... | S14 |
| 3',5'-Di( <i>tert</i> -butyldimethylsilyl)- <i>N</i> <sup>4</sup> -(2,2,2-trichloro- <i>tert</i> -butyloxycarbonyl)-5-(1-hydroxy-3-phenylprop-2-ynyl)-2'-deoxycytidine ( <b>6c</b> ) and 6-((2 <i>R</i> ,4 <i>S</i> ,5 <i>R</i> )-4-( <i>tert</i> -butyldimethylsilyloxy)-5-(( <i>tert</i> -butyldimethylsilyloxy)methyl)tetrahydrofuran-2-yl)-4-(phenylethynyl)-1 <i>H</i> -pyrimido[4,5- <i>d</i> ][1,3]oxazine-2,7(4 <i>H</i> ,6 <i>H</i> )-dione ( <b>7c</b> ) .....                     | S16 |
| 6-((2 <i>R</i> ,4 <i>S</i> ,5 <i>R</i> )-4-( <i>tert</i> -Butyldimethylsilyloxy)-5-(( <i>tert</i> -butyldimethylsilyloxy)methyl)tetrahydrofuran-2-yl)-4-vinyl-1 <i>H</i> -pyrimido[4,5- <i>d</i> ][1,3]oxazine-2,7(4 <i>H</i> ,6 <i>H</i> )-dione ( <b>7d</b> ) .....                                                                                                                                                                                                                        | S17 |
| 3',5'-Di( <i>tert</i> -butyldimethylsilyl)- <i>N</i> <sup>4</sup> -(2,2,2-trichloro- <i>tert</i> -butyloxycarbonyl)-3,6-dihydro-5-formyl-6-methyl-2'-deoxycytidine ( <b>8a</b> ).....                                                                                                                                                                                                                                                                                                        | S18 |
| 3',5'-Di( <i>tert</i> -butyldimethylsilyl)- <i>N</i> <sup>4</sup> -(2,2,2-trichloro- <i>tert</i> -butyloxycarbonyl)-3,6-dihydro-5-formyl-6-(trimethylsilylethynyl)-2'-deoxycytidine ( <b>8b</b> ) .....                                                                                                                                                                                                                                                                                      | S19 |
| 3',5'-Di( <i>tert</i> -butyldimethylsilyl)- <i>N</i> <sup>4</sup> -(2,2,2-trichloro- <i>tert</i> -butyloxycarbonyl)-3,6-dihydro-5-formyl-6-(2-phenylethynyl)-2'-deoxycytidine ( <b>8c</b> ) .....                                                                                                                                                                                                                                                                                            | S21 |
| 3',5'-Di( <i>tert</i> -butyldimethylsilyl)- <i>N</i> <sup>4</sup> -(2,2,2-trichloro- <i>tert</i> -butyloxycarbonyl)-3,6-dihydro-5-formyl-6-vinyl-2'-deoxycytidine ( <b>8d</b> ) and 3',5'-( <i>tert</i> -butyldimethylsilyl)- <i>N</i> <sup>4</sup> , <i>N</i> <sup>4</sup> -bis(2,2,2-trichloro- <i>tert</i> -butyloxycarbonyl)-3,6-dihydro-5-formyl-6-vinyl-2'-deoxycytidine ( <b>8e</b> ) .....                                                                                           | S22 |
| 3',5'-Di( <i>tert</i> -butyldimethylsilyl)-3,6-dihydro-5-formyl-6-methyl-2'-deoxycytidine ( <b>9a</b> ) ..                                                                                                                                                                                                                                                                                                                                                                                   | S23 |
| 3',5'-Di( <i>tert</i> -butyldimethylsilyl)-3,6-dihydro-5-formyl-6-(trimethylsilylethynyl)-2'-deoxycytidine ( <b>9b</b> ) .....                                                                                                                                                                                                                                                                                                                                                               | S24 |
| 3',5'-Di( <i>tert</i> -butyldimethylsilyl)-3,6-dihydro-5-formyl-6-(2-phenylethynyl)-2'-deoxycytidine ( <b>9c</b> ) .....                                                                                                                                                                                                                                                                                                                                                                     | S25 |
| 3',5'-Di( <i>tert</i> -butyldimethylsilyl)-3,6-dihydro-5-formyl-6-vinyl-2'-deoxycytidine <b>9d</b> .....                                                                                                                                                                                                                                                                                                                                                                                     | S26 |
| NMR Spectra: .....                                                                                                                                                                                                                                                                                                                                                                                                                                                                           | S27 |

## General experimental methods:

All reactions were run under an atmosphere of argon unless otherwise indicated. Room temperature refers to 22 °C, ambient pressure to 1013 hPa. Reagents and anhydrous solvents were transferred via oven-dried syringe or cannula. Flasks were flame dried under vacuum and cooled under a constant stream of argon. Tetrahydrofuran (THF) was distilled under argon from potassium, dichloromethane from SICAPENT (phosphorus pentoxide on solid support with indicator). Pyridine was purchased from Acros (anhydrous over molecular sieves). All other chemicals were purchased from ABCR, Acros, Aldrich, Alfa Aesar, TCI Europe and VWR at the highest commercially available purity and used as such. Reactions were monitored by thin layer chromatography using Merck silica gel 60 F<sub>254</sub> TLC aluminium sheets and visualized under a UV lamp and/or with anisaldehyde staining solution. Chromatographic purification was performed as flash chromatography on Acros silica gel 35–70, 60 Å, using a forced flow of eluent (method of Still) or MACHEREY-NAGEL silica gel 60 M C18-Reversed phase. Concentration under reduced pressure was performed by rotary evaporation at 40 °C at the appropriate pressure. NMR spectra were recorded on a Varian Mercury plus 300 (operating at 300 MHz for <sup>1</sup>H and 75 MHz for <sup>13</sup>C acquisitions), a Varian Mercury plus 400 (operating at 400 MHz for <sup>1</sup>H, 100 MHz for <sup>13</sup>C). Chemical shifts  $\delta$  are reported in ppm with the solvent resonance as internal standard (chloroform-*d*<sub>1</sub>: 7.26 (<sup>1</sup>H NMR), 77.16 (<sup>13</sup>C NMR); methanol-*d*<sub>4</sub>: 3.31 (<sup>1</sup>H NMR), 49.00 (<sup>13</sup>C NMR); dimethyl sulfoxide-*d*<sub>6</sub>: 2.50 (<sup>1</sup>H NMR), 39.52 (<sup>13</sup>C NMR). Coupling constants *J* are given in Hertz (Hz). Multiplicities are classified by the following abbreviations: s = singlet, d = doublet, t = triplet and combinations thereof, or m = multiplet or bs = broad signal. High resolution mass spectra were obtained on a Bruker Daltonics ESI-FT-ICR-MS APEX II [7 T]. IR spectra were obtained on an ATI/MATTSON Genesis FT-IR as thin film or KBr disk. Absorbance frequencies are reported in reciprocal centimeters (cm<sup>-1</sup>). Melting points were measured with a Büchi "Melting Point B-540" and are uncorrected. Optical rotation data was obtained with a Schmidt+Haensch Polartronic MHZ-8 at the sodium-D line (589 nm) using a 50 mm path-length cell in the solvent and concentration indicated.

In <sup>13</sup>C NMR reports of diastereomeric mixtures one value is given in the case of overlapped signals, otherwise the corresponding signal is given in parentheses.

In <sup>1</sup>H NMR reports of diastereomeric mixtures protons marked with asterisk indicate the signals of corresponding minor diastereomer. The ratio of the diastereomers was determined by <sup>1</sup>H NMR.

### 3',5'-Di(*tert*-butyldimethylsilyl)-5-(1-hydroxyethyl)-2'-deoxycytidine (**2a**)

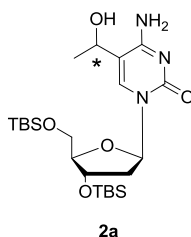

To an ice-cooled solution of aldehyde **1** (100 mg, 207  $\mu$ mol, 1.0 equiv) in THF (2.00 mL) methylmagnesium bromide (3.0 M in Et<sub>2</sub>O; 138  $\mu$ L, 413  $\mu$ mol, 2.0 equiv) was added dropwise and the solution stirred at 0 °C. After one hour the reaction mixture was allowed to warm to room temperature and stirred at this temperature for four hours. Subsequently additional amount of methylmagnesium bromide (3.0 M in Et<sub>2</sub>O; 69.0  $\mu$ L, 207  $\mu$ mol, 1.0 equiv) was added and the reaction mixture was stirred overnight at room temperature. Additional portion of methylmagnesium bromide (3.0 M in Et<sub>2</sub>O; 69.0  $\mu$ L, 207  $\mu$ mol, 1.0 equiv) was then added and the reaction mixture was stirred for another three hours at room temperature before it was quenched with saturated aqueous NH<sub>4</sub>Cl (5 mL) and diluted with DCM (10 mL). The phases were separated and the aqueous layer was extracted with DCM (2  $\times$  10 mL). The combined organic layers were washed with brine (10 mL), dried over MgSO<sub>4</sub> and the solvents were removed under reduced pressure. The crude product was purified by column chromatography (DCM/MeOH, 60:1  $\rightarrow$  15:1 v/v) to yield a mixture of diastereomeric alcohols **2a** with a ratio of 1.1:1 (99.0 mg, 198  $\mu$ mol, 96%) as a colourless oil.

**R<sub>f</sub>**: 0.37 (DCM/MeOH = 15:1 v/v).

**IR**: (KBr)  $\nu_{\text{max}}$  = 2858, 2954, 2857, 1656, 1435, 1095, 838, 780, 554 cm<sup>-1</sup>.

**<sup>1</sup>H-NMR**: (400 MHz, CD<sub>3</sub>OD)  $\delta$  (ppm) 7.76 (s, 1H, **H-6**), 7.73 (s, 1H, **H-6\***), 6.30-6.26 (m, 2H, **H-1'**, **H-1'\***), 4.74-4.44 (m, 2H, **CH-CH<sub>3</sub>**, **CH\*-CH<sub>3</sub>**), 4.47-4.42 (m, 2H, **H-3'**, **H-3'\***), 3.96-3.95 (m, 2H, **H-4'**, **H-4'\***), 3.82-3.81 (m, 4H, **H-5'**, **H-5'\***), 2.36-2.30 (m, 2H, **H-2'**, **H-2'\***), 2.11-2.03 (m, 2H, **H-2'**, **H-2'\***), 1.43-1.42 (m, 6H, **CH-CH<sub>3</sub>**, **CH-CH<sub>3</sub>\***), 0.93-0.91 (m, 18H, Si-C(CH<sub>3</sub>)<sub>3</sub>, Si-C(CH<sub>3</sub>)<sub>3</sub>\*), 0.91 (s, 18H, Si-C(CH<sub>3</sub>)<sub>3</sub>, Si-C(CH<sub>3</sub>)<sub>3</sub>\*), 0.12 (s, 12H, Si-(CH<sub>3</sub>)<sub>2</sub>, Si-(CH<sub>3</sub>)<sub>2</sub>\*), 0.11 (s, 12H, Si-(CH<sub>3</sub>)<sub>2</sub>, Si-(CH<sub>3</sub>)<sub>2</sub>\*).

**<sup>13</sup>C-NMR**: (100 MHz, CD<sub>3</sub>OD)  $\delta$  (ppm) 165.0 (**C-4**), 157.9 (**C-2**), 138.3 (**C-6**), 89.5 (89.4) (**C-4'**), 87.4 (87.3) (**C-1'**), 73.9 (73.8) (**C-3'**), 65.7 (**CH-CH<sub>3</sub>**), 64.3 (**C-5'**), 42.3 (42.1) (**C-2'**), 26.5 (Si-C(CH<sub>3</sub>)<sub>3</sub>), 26.2 (Si-C(CH<sub>3</sub>)<sub>3</sub>), 22.9 (22.8) (**CH-CH<sub>3</sub>**), 19.2 (Si-C(CH<sub>3</sub>)<sub>3</sub>), 18.8 (Si-C(CH<sub>3</sub>)<sub>3</sub>), -4.6 (Si-CH<sub>3</sub>), -4.7 (Si-CH<sub>3</sub>), -5.2 (Si-CH<sub>3</sub>). **C-5** is not observed.

**HR-MS**: (ESI positive, MeOH), [M+H]<sup>+</sup> calcd for C<sub>23</sub>H<sub>46</sub>N<sub>3</sub>O<sub>5</sub>Si<sub>2</sub>: 500.29705, found: 500.29727, [2M+H]<sup>+</sup> calcd for C<sub>46</sub>H<sub>91</sub>N<sub>6</sub>O<sub>10</sub>Si<sub>4</sub>: 999.58683, found: 999.58716.



### 5-(1-Hydroxyethyl)-2'-deoxycytidine (**3a**)

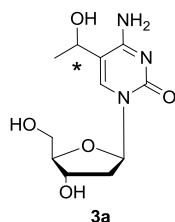

In a polypropylene tube the mixture of epimeric alcohols **2a** (98.0 mg, 196  $\mu$ mol, 1.0 equiv) was dissolved in DCM (10.0 mL) and cooled to 0 °C. Subsequently HF·Et<sub>3</sub>N (64.0  $\mu$ L, 392  $\mu$ mol, 2.0 equiv) was added in one portion. The solution was allowed to warm to room temperature and stirred overnight. After addition of TMSOMe (0.700 mL, 5.08 mmol, 26 equiv) the reaction mixture was stirred for another 30 min. The suspension was centrifuged for 10 min at 5000 rpm, the supernatant was collected and the residue was resuspended in DCM and centrifuged for 10 min at 5000 rpm. The procedure was repeated one more time and the crude product was purified by reversed phase column chromatography (H<sub>2</sub>O/MeCN 4:1 v/v) to yield a mixture of diastereomeric alcohols **3a** (40.0 mg, 147  $\mu$ mol, 75%) as a colourless oil. A ratio could not be calculated.

**IR:** (CCl<sub>4</sub>)  $\nu_{\text{max}}$  = 3441, 2924, 2360, 1736, 1652, 1383, 1247, 1026, 795, 602, 456 cm<sup>-1</sup>.

**<sup>1</sup>H-NMR:** (300 MHz, CD<sub>3</sub>OD)  $\delta$  (ppm) 8.06 -8.05 (m, 2H, **H-6**, **H-6\***), 6.31-6.26 (m, 2H, **H-1'**, **H-1'\***), 4.75-4.68 (m, 2H, **CH-CH<sub>3</sub>**, **CH-CH<sub>3</sub>\***), 4.42-4.37 (m, 2H, **H-3'**, **H-3'\***), 3.98-3.94 (m, 2H, **H-4'**, **H-4'\***), 3.87-3.81 (m, 2H, **H-5'**, **H-5'\***), 3.78-3.73 (m, 2H, **H-5'**, **H-5'\***), 2.42-2.34 (m, 2H, **H-2'**, **H-2'\***), 2.21-2.12 (m, 2H, **H-2'**, **H-2'\***), 1.48-1.46 (m, 6H, **CH-CH<sub>3</sub>**, **CH-CH<sub>3</sub>\***).

**<sup>13</sup>C-NMR:** (100 MHz, CD<sub>3</sub>OD)  $\delta$  (ppm) 166.1 (**C-4**), 157.9 (**C-2**), 139.3 (**C-6**), 111.8 (111.7) (**C-5**), 88.90 (88.88) (**C-4'**), 87.7 (87.6) (**C-1'**), 71.92 (71.90) (**C-3'**), 65.8 (65.7) (**CH-CH<sub>3</sub>**), 62.6 (**C-5'**), 42.21 (42.18) (**C-2'**), 22.42 (22.40) (**CH-CH<sub>3</sub>**).

**HR-MS:** (ESI positive, MeOH), [M+Na]<sup>+</sup> calcd for C<sub>11</sub>H<sub>17</sub>N<sub>3</sub>O<sub>5</sub>Na: 294.10604, found: 294.10617, [2M+Na]<sup>+</sup> calcd for C<sub>22</sub>H<sub>34</sub>N<sub>6</sub>O<sub>10</sub>Na: 565.22286, found: 565.22330.

**3',5'-Di(*tert*-butyldimethylsilyl)-5-(1-hydroxy-3-(trimethylsilyl)prop-2-ynyl)-2'-deoxycytidine (**2b**) and 3',5'-di(*tert*-butyldimethylsilyl)-5-(1-hydroxyprop-2-ynyl)-2'-deoxycytidine (**2e**)**

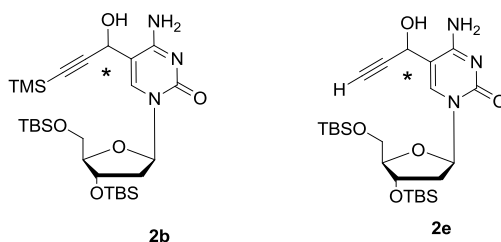

To a stirred solution of trimethylsilylacetylene (671  $\mu$ L, 4.71 mmol, 4.0 equiv) in THF (9.00 mL) *n*-BuLi (2.5 M in *n*-hexane; 1.89 mL, 4.71 mmol, 4.0 equiv) was added dropwise at  $-40$   $^{\circ}$ C. The reaction mixture was warmed to  $-20$   $^{\circ}$ C. After stirring at this temperature for one hour reaction mixture was cooled down to  $-40$   $^{\circ}$ C and a solution of aldehyde **1** (570 mg, 1.18 mmol, 1.0 equiv) in THF (11.0 mL) was added dropwise. The reaction was stirred at  $-40$   $^{\circ}$ C for three hours, thereafter at  $-20$   $^{\circ}$ C for 30 min. The reaction was quenched with saturated aqueous  $\text{NH}_4\text{Cl}$  (20 mL), diluted with  $\text{Et}_2\text{O}$  (30 mL) and the aqueous layer extracted with  $\text{Et}_2\text{O}$  ( $3 \times 10$  mL). The combined organic phases were dried over  $\text{MgSO}_4$  and the solvents were removed under reduced pressure. Purification by silica gel chromatography (DCM/MeOH, 60:1  $\rightarrow$  15:1 v/v) yielded mixture of diastereomeric alcohols **2b** with a ratio of 1.9:1 (296 mg, 509  $\mu$ mol, 43 %) as yellow solid and a mixture of diastereomeric alcohols **2e** with a ratio of 1.2:1 (154 mg, 302  $\mu$ mol, 26%) as a slight yellow oil.

## **2b:**

**R<sub>f</sub>**: 0.21 (DCM/MeOH = 30:1 v/v).

**IR:** (KBr)  $\nu_{\text{max}}$  = 3427, 2955, 2858, 1658, 1604, 1385, 1253, 1094, 840, 779, 555  $\text{cm}^{-1}$ .

**$^1\text{H}$ -NMR:** (300 MHz,  $\text{CD}_3\text{OD}$ )  $\delta$  (ppm) 7.96 (s, 1H, **H-6**), 7.95 (s, 1H, **H-6\***), 6.24-6.17 (m, 2H, **H-1'**, **H-1'\***), 5.30 (s, 2H, **CH-OH**, **CH\*-OH**), 4.45-4.41 (m, 2H, **H-3'**, **H-3'\***), 4.03-3.98 (m, 2H, **H-4'**, **H-4'\***), 3.83-3.81 (m, 4H, **H-5'**, **H-5'\***), 2.48-2.40 (m, 2H, **H-2'**, **H-2'\***), 2.14-2.01 (m, 2H, **H-2'**, **H-2'\***), 0.92-0.91 (m, 36H,  $2\times\text{Si-C}(\text{CH}_3)_3$ ,  $2\times\text{Si-C}(\text{CH}_3)_3^*$ ), 0.19-0.18 (m, 18H,  $\text{Si-(CH}_3)_3$ ,  $\text{Si-(CH}_3)_3^*$ ), 0.12-0.11 (m, 24H,  $2\times\text{Si-(CH}_3)_2$ ,  $2\times\text{Si-(CH}_3)_2^*$ ).

**$^{13}\text{C}$ -NMR:** (100 MHz,  $\text{CDCl}_3$ )  $\delta$  (ppm) 162.8 (162.6) (**C-4**), 154.9 (**C-2**), 140.2 (139.9) (**C-6**), 106.6 (**C-5**), 102.3 (102.1) ( $\text{C}\equiv\text{C-TMS}$ ), 92.8 (92.5) ( $\text{C}\equiv\text{C-TMS}$ ), 88.7 (88.5) (**C-4'**), 87.3 (87.1) (**C-1'**), 72.8 (72.5) (**C-3'**), 63.5 (63.4) (**C-5'**), 60.3 (60.2) (**CH-OH**), 42.1 (41.8) (**C-2'**), 26.19 (26.16) ( $\text{Si-C}(\text{CH}_3)_3$ ), 26.0 ( $\text{Si-C}(\text{CH}_3)_3$ ), 18.59 (18.57) ( $\text{Si-C}(\text{CH}_3)_3$ ), 18.2 ( $\text{Si-C}(\text{CH}_3)_3$ ), 0.05 ( $\text{Si-(CH}_3)_3$ ), -4.31 (-4.34) ( $\text{Si-CH}_3$ ), -4.63 (-4.65) ( $\text{Si-CH}_3$ ), -5.06 ( $\text{Si-CH}_3$ ), -5.11 ( $\text{Si-CH}_3$ ).

**HR-MS:** (ESI positive, EtOAc),  $[\text{M}+\text{Na}]^+$  calcd for  $\text{C}_{27}\text{H}_{51}\text{N}_3\text{O}_5\text{Si}_3\text{Na}$ : 604.30287, found: 604.30327,  $[\text{2M}+\text{H}]^+$  calcd for  $\text{C}_{54}\text{H}_{103}\text{N}_6\text{O}_{10}\text{Si}_6$ : 1163.63458, found: 1163.63592,  $[\text{2M}+\text{Na}]^+$  calcd for  $\text{C}_{54}\text{H}_{102}\text{N}_6\text{O}_{10}\text{Si}_6\text{Na}$ : 1185.61652, found: 1185.61555.

## **2e:**

**R<sub>f</sub>**: 0.15 (DCM/MeOH = 30:1 v/v).

**IR:** ( $\text{CCl}_4$ )  $\nu_{\text{max}}$  = 3444, 2929, 1660, 1361, 1256, 1093, 837, 780  $\text{cm}^{-1}$ .

**$^1\text{H}$ -NMR:** (300 MHz,  $\text{CD}_3\text{OD}$ )  $\delta$  (ppm) 8.01 (s, 1H, **H-6\***), 7.99 (s, 1H, **H-6**), 6.26-6.20 (m, 2H, **H-1'**, **H-1'\***), 5.34-5.32 (m, 2H, **CH-OH**, **CH\*-OH**), 4.47-4.44 (m, 2H, **H-3'**, **H-3'\***), 4.01-3.98 (m, 2H, **H-4'**, **H-4'\***), 3.82-3.79 (m, 4H, **H-5'**, **H-5'\***), 3.15-3.13 (m, 2H,  $\text{C}\equiv\text{C-H}$ ,  $\text{C}\equiv\text{C-H}^*$ ), 2.47-2.38 (m, 2H, **H-2'**, **H-2'\***), 2.13-2.03 (m, 2H, **H-2'**, **H-2'\***), 0.91-0.90 (m, 36H,  $2\times\text{Si-C}(\text{CH}_3)_3$ ,  $2\times\text{Si-C}(\text{CH}_3)_3^*$ ), 0.11 (s, 24H,  $2\times\text{Si-(CH}_3)_2$ ,  $2\times\text{Si-(CH}_3)_2^*$ ).

**$^{13}\text{C}$ -NMR:** (100 MHz,  $\text{CD}_3\text{OD}$ )  $\delta$  (ppm) 164.5 (**C-4**), 157.7 (**C-2**), 140.3 (**C-6**), 108.4 (**C-5**), 89.8 (89.7) (**C-4'**), 88.1 (88.0) (**C-1'**), 82.4 (82.3) ( $\text{C}\equiv\text{C-H}$ ), 76.72 (76.69) ( $\text{C}\equiv\text{C-H}$ ), 74.2

(74.1) (**C-3'**), 64.38 (64.35) (**C-5'**), 59.81 (59.77) (**CH-OH**), 42.4 (42.3) (**C-2'**), 26.43 (26.41) (**Si-C(CH<sub>3</sub>)<sub>3</sub>**), 26.21 (26.18) (**Si-C(CH<sub>3</sub>)<sub>3</sub>**), 19.2 (19.1) (**Si-C(CH<sub>3</sub>)<sub>3</sub>**), 18.8 (**Si-C(CH<sub>3</sub>)<sub>3</sub>**), -4.56 (-4.55) (**Si-CH<sub>3</sub>**), -4.7 (**Si-CH<sub>3</sub>**), -5.2 (**Si-CH<sub>3</sub>**), -5.30 (-5.32) (**Si-CH<sub>3</sub>**).

**HR-MS:** (ESI positive, MeOH),  $[M+H]^+$  calcd for  $C_{24}H_{44}N_3O_5Si_2$ : 510.2814, found: 510.28181,  $[2M+H]^+$  calcd for  $C_{48}H_{87}N_6O_{10}Si_4$ : 1019.55553, found: 1019.55476.

### 5-(1-Hydroxyprop-2-ynyl)-2'-deoxycytidine (**3b**)

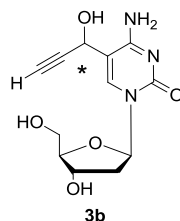

To a solution of epimeric alcohols **2b** (68.6 mg, 118  $\mu$ mol, 1.0 equiv) in EtOAc (2.80 mL) in a polypropylene tube pyridine (44.0  $\mu$ L, 542  $\mu$ mol, 4.6 equiv) and HF·pyridine (70% HF, 13.5  $\mu$ L, 514  $\mu$ mol, 4.4 equiv) were added subsequently. After stirring for six hours another portion of pyridine (44.0  $\mu$ L, 542  $\mu$ mol, 4.6 equiv) and HF·pyridine (70% HF, 13.5  $\mu$ L, 514  $\mu$ mol, 4.4 equiv) was added to the reaction mixture. After stirring for 23 hours an additional portion of pyridine (44.0  $\mu$ L, 542  $\mu$ mol, 4.6 equiv) and HF·pyridine (70% HF, 13.5  $\mu$ L, 514  $\mu$ mol, 4.4 equiv) was added and the stirring was continuing overnight. After addition of TMSOMe (0.50 mL, 3.63 mmol, 31 equiv) and stirring for one hour, a suspension was formed and centrifuged for 10 min at 3000 rpm. The supernatant was collected, the residue resuspended in EtOAc and centrifuged for 10 min at 3000 rpm. The crude product was purified by reversed phase column chromatography ( $H_2O/MeCN$  4:1 v/v) to yield a mixture of diastereomeric alcohols **3b** (20.0 mg, 71.1  $\mu$ mol, 60%) as a white solid. A ratio could not be calculated.

**IR:** ( $CCl_4$ )  $\nu_{max}$  = 3444, 2921, 2239, 1733, 1625, 1384, 711, 602, 454  $cm^{-1}$ .

**<sup>1</sup>H NMR** (400 MHz,  $CD_3OD$ )  $\delta$  (ppm) 8.22-8.20 (m, 2H, **H-6**, **H-6\***), 6.27-6.24 (m, 2H, **H-1'**, **H-1'\***), 5.31-5.30 (m, 2H, **CH-OH**, **CH\*-OH**), 4.37-4.33 (m, 2H, **H-3'**, **H-3'\***), 3.96-3.94 (m, 2H, **H-4'**, **H-4'\***), 3.81-3.71 (m, 4H, **H-5'**, **H-5'\***), 3.13-3.12 (m, 2H, **C $\equiv$ C-H**, **C $\equiv$ C-H\***), 2.42-2.36 (m, 2H, **H-2'**, **H-2'\***), 2.17-2.09 (m, 2H, **H-2'**, **H-2'\***).

**<sup>13</sup>C-NMR:** (75 MHz,  $CD_3OD$ )  $\delta$  (ppm): 165.5 (**C-4**), 157.8 (**C-2**), 141.1 (**C-6**), 108.0 (**C-5**), 89.0 (**C-4'**), 87.82 (87.79) (**C-1'**), 82.4 (**C $\equiv$ C-H**), 76.73 (76.66) (**C $\equiv$ C-H**), 72.20 (72.17) (**C-3'**), 63.00 (62.95) (**C-5'**), 60.0 (**CH-OH**), 42.1 (**C-2'**).

**HR-MS:** (ESI positive, MeOH),  $[M+H]^+$  calcd for  $C_{12}H_{16}N_3O_5$ : 282.10845, found: 282.10885,  $[M+Na]^+$  calcd for  $C_{12}H_{15}N_3O_5Na$ : 304.09039, found: 304.09060,  $[2M+H]^+$  calcd for  $C_{24}H_{31}N_6O_{10}$ : 563.20962, found: 563.20940.

**3',5'-Di(*tert*-butyldimethylsilyl)-5-(1-hydroxy-3-phenylprop-2-ynyl)-2'-deoxycytidine (2c)**

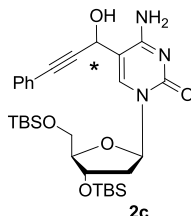

To a stirred solution of phenylacetylene (91.0  $\mu\text{L}$ , 827  $\mu\text{mol}$ , 4.0 equiv) in THF (1.50 mL) at  $-78^\circ\text{C}$  *n*-BuLi (2.5 M in *n*-hexane; 331  $\mu\text{L}$ , 827  $\mu\text{mol}$ , 4.0 equiv) was added dropwise. After stirring the reaction mixture at this temperature for 90 min a solution of aldehyde **1** (100 mg, 207  $\mu\text{mol}$ , 1.0 equiv) in THF (2.00 mL) was added dropwise. The reaction was stirred at  $-78^\circ\text{C}$  for three hours thereafter at  $-50^\circ\text{C}$  till no starting material was detected by TLC. The reaction was quenched with saturated aqueous  $\text{NH}_4\text{Cl}$  (5 mL), diluted with DCM (10 mL). The aqueous layer was extracted with DCM ( $3 \times 10$  mL). The combined organic phases were washed with brine (10 mL) and dried over  $\text{MgSO}_4$  and the solvents were removed under reduced pressure. Purification by silica gel chromatography (DCM/MeOH, 60:1  $\rightarrow$  15:1 *v/v*) yielded a mixture of diastereomeric alcohols **2c** with a ratio of 1.2:1 (82.0 mg, 140  $\mu\text{mol}$ , 68%) as a slight yellow oil.

**R<sub>f</sub>**: 0.24 (DCM/MeOH = 30:1 *v/v*).

**IR**: (KBr)  $\nu_{\text{max}}$  = 3420, 2929, 1655, 1470, 1384, 1095, 838, 780, 558  $\text{cm}^{-1}$ .

**$^1\text{H}$ -NMR**: (300 MHz,  $\text{CD}_3\text{OD}$ )  $\delta$  (ppm) 8.08 (d,  $J$  = 0.8 Hz, 1H, **H-6\***), 8.06 (d,  $J$  = 0.7 Hz, 1H, **H-6**), 7.49-7.45 (m, 4H, **CH** aromat., **CH\*** aromat.), 7.40-7.36 (m, 6H, **CH** aromat., **CH\*** aromat.), 6.29-6.23 (m, 2H, **H-1'**, **H-1''**), 5.58 (5.57) (m, 2H, **CH-OH**, **CH\*-OH**), 4.47-4.42 (m, 2H, **H-3'**, **H-3''**), 4.02-3.99 (m, 2H, **H-4'**, **H-4''**), 3.78-3.74 (m, 4H, **H-5'**, **H-5''**), 2.51-2.42 (m, 2H, **H-2'**, **H-2''**), 2.15-2.05 (m, 2H, **H-2'**, **H-2''**), 0.93 (s, 18H,  $\text{Si-C}(\text{CH}_3)_3$ ,  $\text{Si-C}(\text{CH}_3)_3^*$ ), 0.88 (s, 9H,  $\text{Si-C}(\text{CH}_3)_3$ ), 0.87 (s, 9H,  $\text{Si-C}(\text{CH}_3)_3^*$ ), 0.11 (m, 12H,  $\text{Si-CH}_3$ ,  $\text{Si-CH}_3^*$ ), 0.04 (m, 6H), 0.03 (s, 3H), 0.02 (s, 3H).

**$^{13}\text{C}$ -NMR**: (75 MHz,  $\text{CD}_3\text{OD}$ )  $\delta$  (ppm) 164.9 (**C-4**), 158.1 (**C-2**), 140.2 (**C-6**), 132.7 (132.6) (**C** aromat.), 130.03 (130.00) (**C** aromat.), 129.62 (129.61) (**C** aromat.), 123.3 (**C** aromat.), 89.75 (89.72), 88.1 (88.0), 87.6 (87.5), 74.3 (74.2) (**C-3'**), 64.6 (**C-5'**), 60.6 (60.5) (**CH-OH**), 42.46 (42.40) (**C-2'**), 26.39 (26.36) ( $\text{Si-C}(\text{CH}_3)_3$ ), 26.2 ( $\text{Si-C}(\text{CH}_3)_3$ ), 19.11 (19.08) ( $\text{Si-C}(\text{CH}_3)_3$ ), 18.8 ( $\text{Si-C}(\text{CH}_3)_3$ ), -4.6 ( $\text{Si-CH}_3$ ), -4.7 ( $\text{Si-CH}_3$ ), -5.2 (-5.3) ( $\text{Si-CH}_3$ ), -5.3 (-5.4) ( $\text{Si-CH}_3$ ).

**HR-MS**: (ESI positive, MeOH),  $[\text{M}+\text{H}]^+$  calcd for  $\text{C}_{30}\text{H}_{48}\text{N}_3\text{O}_5\text{Si}_2$ : 586.31270, found: 586.31259,  $[2\text{M}+\text{H}]^+$  calcd for  $\text{C}_{60}\text{H}_{95}\text{N}_6\text{O}_{10}\text{Si}_4$ : 1171.61813, found: 1171.61902.

### 5-(1-Hydroxy-3-phenylprop-2-ynyl)-2'-deoxycytidine (3c)

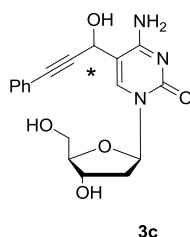

In a polypropylene tube the mixture of epimeric alcohols **2c** (75.0 mg, 128  $\mu$ mol, 1.0 equiv) was dissolved in EtOAc (3.70 mL), subsequently pyridine (52.0  $\mu$ L, 640  $\mu$ mol, 5.0 equiv) and HF·pyridine (70% HF, 48.0  $\mu$ L, 1.92 mmol, 15 equiv) were added and the reaction mixture was stirred overnight at room temperature. After addition of TMSOMe (0.50 mL, 3.84 mmol, 30 equiv) and stirring for one hour the suspension was centrifuged for 10 min at 3000 rpm and the crude product was purified by reversed phase column chromatography (H<sub>2</sub>O/MeCN 4:1  $\rightarrow$  2:1 v/v) to yield a mixture of diastereomeric alcohols **3c** with a ratio of 1.1:1 (33.0 mg, 92.3  $\mu$ mol, 72%) as a colourless oil.

**IR:** (CCl<sub>4</sub>)  $\nu_{\max}$  = 3355, 2922, 1660, 1488, 1299, 1093, 1029, 758, 607, 454 cm<sup>-1</sup>.

**<sup>1</sup>H-NMR:** (300 MHz, CD<sub>3</sub>OD)  $\delta$  (ppm) 8.21 (s, 1H, **H-6'**), 8.19 (s, 1H, **H-6''**), 7.49-7.46 (m, 4H, **CH** aromat., **CH\*** aromat.), 7.36-7.34 (m, 6H, **CH** aromat., **CH\*** aromat.), 6.25 (m, 2H, **H-1'**, **H-1''**), 5.54 (s, 2H, **CH-OH**, **CH\*-OH**), 4.36-4.32 (m, 2H, **H-3'**, **H-3''**), 3.97-3.92 (m, 2H, **H-4'**, **H-4''**), 3.72-3.68 (m, 4H, **H-5'**, **H-5''**), 2.45-2.36 (m, 2H, **H-2'**, **H-2''**), 2.18-2.09 (m, 2H, **H-2'**, **H-2''**).

**<sup>13</sup>C-NMR:** (100 MHz, CD<sub>3</sub>OD)  $\delta$  (ppm) 165.5 (**C-4**), 157.8 (**C-2**), 141.0 (140.9) (**C-6**), 132.7 (**C** aromat.), 129.9 (**C** aromat.), 129.6 (**C** aromat.), 123.5 (**C** aromat.), 108.2 (**C-5**), 89.03 (88.97) (**C-4'**), 87.9 (87.8), 87.70 (87.68), 87.5 (87.4), 72.3 (72.2) (**C-3'**), 63.04 (62.98), 60.8 (60.7), 42.08 (42.06) (**C-2'**).

**HR-MS:** (ESI positive, MeOH), [M+H]<sup>+</sup> calcd for C<sub>18</sub>H<sub>20</sub>N<sub>3</sub>O<sub>5</sub>: 358.13975, found: 358.13957, [M+Na]<sup>+</sup> calcd for C<sub>18</sub>H<sub>19</sub>N<sub>3</sub>O<sub>5</sub>Na: 380.12169, found: 380.12140, [2M+H]<sup>+</sup> calcd for C<sub>36</sub>H<sub>39</sub>N<sub>6</sub>O<sub>10</sub>: 715.27222, found: 715.27221

### 3',5'-Di(*tert*-butyldimethylsilyl)-5-(1-hydroxyprop-2-enyl)-2'-deoxycytidine (2d)

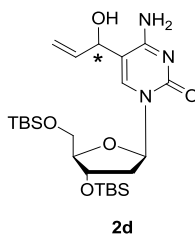

To an ice-cooled solution of aldehyde **1** (50.0 mg, 103  $\mu$ mol, 1.0 equiv) in THF (1.00 mL) vinylmagnesium bromide (1.0 M in THF; 155  $\mu$ L, 155  $\mu$ mol, 1.5 equiv) was added dropwise. After stirring for 20 min the reaction mixture was allowed to warm to room temperature and

was stirred for additional two hours. Subsequently an additional amount of vinylmagnesium bromide (1.0 M in THF; 258  $\mu$ L, 258  $\mu$ mol, 2.5 equiv) was added at 0 °C and the reaction mixture was stirred overnight at room temperature. The reaction was quenched with saturated aqueous  $\text{NH}_4\text{Cl}$  (5 mL) and diluted with  $\text{Et}_2\text{O}$  (10 mL). The phases were separated and the aqueous layer was extracted with  $\text{Et}_2\text{O}$  ( $2 \times 5$  mL). The combined organic layers were washed with brine (10 mL), dried over  $\text{MgSO}_4$  and the solvents were removed under reduced pressure. The crude product was purified by column chromatography ( $\text{DCM}/\text{MeOH}$ , 60:1  $\rightarrow$  15:1  $v/v$ ) to yield a mixture of diastereomeric alcohols **2d** with a ratio of 1.1:1 (41.0 mg, 0.19 mmol, 77%) as a slight yellow solid.

**R<sub>f</sub>**: 0.36 ( $\text{DCM}/\text{MeOH}$  = 15:1  $v/v$ ).

**IR**: (KBr)  $\nu_{\text{max}}$  = 3420, 1638, 1428, 1385, 1093, 838, 780, 550  $\text{cm}^{-1}$ .

**$^1\text{H}$ -NMR**: (300 MHz,  $\text{CD}_3\text{OD}$ )  $\delta$  (ppm) 7.75 (s, 1H, **H-6\***), 7.73 (s, 1H, **H-6**), 6.29-6.24 (m, 2H, **H-1'**, **H-1\***), 6.01-5.95 (m, 2H, **CH=CH<sub>2</sub>**, **CH\*=CH<sub>2</sub>**), 5.43-5.35 (m, 2H, **CH=CH<sub>2</sub>**, **CH=CH<sub>2</sub>\***), 5.28-5.23 (m, 2H, **CH=CH<sub>2</sub>**, **CH=CH<sub>2</sub>\***), 5.06-5.04 (m, 2H, **CH-OH**, **CH\*-OH**), 4.46-4.43 (m, 2H, **H-3'**, **H-3\***), 3.99-3.92 (m, 2H, **H-4'**, **H-4\***), 3.81-3.80 (m, 4H, **H-5'**, **H-5\***), 2.39-2.31 (m, 2H, **H-2'**, **H-2\***), 2.14-1.98 (m, 2H, **H-2'**, **H-2\***), 0.93 (s, 18H, **Si-C(CH<sub>3</sub>)<sub>3</sub>**, **Si-C(CH<sub>3</sub>)<sub>3</sub>\***), 0.91 (s, 18H, **Si-C(CH<sub>3</sub>)<sub>3</sub>**, **Si-C(CH<sub>3</sub>)<sub>3</sub>\***), 0.12 (s, 12H, **Si-(CH<sub>3</sub>)<sub>2</sub>**, **Si-(CH<sub>3</sub>)<sub>2</sub>\***), 0.11 (s, 12H, **Si-(CH<sub>3</sub>)<sub>2</sub>**, **Si-(CH<sub>3</sub>)<sub>2</sub>\***).

**$^{13}\text{C}$ -NMR**: (75 MHz,  $\text{CD}_3\text{OD}$ )  $\delta$  (ppm) 165.1 (**C-4**), 157.8 (**C-2**), 139.7 (**C-6**), 139.04 (138.97) (**CH=CH<sub>2</sub>**), 116.7 (116.6) (**CH=CH<sub>2</sub>**), 89.52 (89.47) (**C-4'**), 87.5 (**C-1'**), 73.96 (73.94), 70.7 (70.5), 64.4 (**C-5'**), 42.34 (42.26) (**C-2'**), 26.5 (**Si-C(CH<sub>3</sub>)<sub>3</sub>**), 26.4 (**Si-C(CH<sub>3</sub>)<sub>3</sub>**), 19.2 (**Si-C(CH<sub>3</sub>)<sub>3</sub>**), 18.8 (**Si-C(CH<sub>3</sub>)<sub>3</sub>**), -4.5 (**Si-CH<sub>3</sub>**), -4.7 (**Si-CH<sub>3</sub>**), -5.18 (**Si-CH<sub>3</sub>**), -5.23 (**Si-CH<sub>3</sub>**). **C-5** is not observed.

**HR-MS**: (ESI positive,  $\text{CHCl}_3/\text{MeOH}$ ),  $[\text{M}+\text{H}]^+$  calcd for  $\text{C}_{24}\text{H}_{46}\text{N}_3\text{O}_5\text{Si}_2$ : 512.29705, found: 512.29713.

### 5-(1-Hydroxyprop-2-enyl)-2'-deoxycytidine (**3d**)

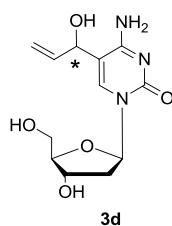

In a polypropylene tube mixture of epimeric alcohols **2d** (134 mg, 262  $\mu$ mol, 1.0 equiv) was dissolved in  $\text{EtOAc}$  (6.00 mL). Subsequently pyridine (97.0  $\mu$ L, 1.20 mmol, 4.6 equiv) and  $\text{HF} \cdot \text{pyridine}$  (70%  $\text{HF}$ , 30.0  $\mu$ L, 1.15 mmol, 4.4 equiv) were added and the solution was stirred for six hours. An additional portion of pyridine (97.0  $\mu$ L, 1.20 mmol, 4.6 equiv) and  $\text{HF} \cdot \text{pyridine}$  (70%  $\text{HF}$ , 30.0  $\mu$ L, 1.15 mmol, 4.4 equiv) was added to the reaction mixture which was stirred for 46 hours. After the addition of  $\text{TMSOMe}$  (1.00 mL, 7.24 mmol, 28 equiv) a suspension was formed, which was stirred for two hours and centrifuged for 10 min at 3000 rpm. The supernatant was then collected and the residue resuspended in  $\text{EtOAc}$  and centrifuged for 10 min at 3000 rpm. The procedure was repeated one more time. The

reaction yielded a mixture of diastereomeric alcohols **3d** (54.0 mg, 191  $\mu$ mol, 73%) as a slight yellow oil. A ratio could not be calculated.

**IR:** (KBr)  $\nu_{\max}$  = 3419, 1656, 1603, 1516, 1480, 1300, 1257, 1094, 1054, 931, 789, 765, 545  $\text{cm}^{-1}$ .

**$^1\text{H}$ -NMR:** (400 MHz,  $\text{CD}_3\text{OD}$ )  $\delta$  (ppm) 8.02-8.01 (m, 2H, **H-6**, **H-6\***), 6.26-6.23 (m, 2H, **H-1'**, **H-1'\***), 6.12-5.93 (m, 2H, **CH=CH<sub>2</sub>**, **CH=CH<sub>2</sub>\***), 5.42-5.36 (m, 2H, **CH=CH<sub>2</sub>**, **CH=CH<sub>2</sub>\***), 5.27-5.24 (m, 2H, **CH=CH<sub>2</sub>**, **CH=CH<sub>2</sub>\***), 5.04-5.02 (m, 2H, **CH-OH**, **CH\*-OH**), 4.38-4.34 (m, 2H, **H-3'**, **H-3'\***), 3.95-3.92 (m, 2H, **H-4'**, **H-4'\***), 3.83-3.66 (m, 4H, **H-5'**, **H-5'\***), 2.39-2.33 (m, 2H, **H-2'**, **H-2'\***), 2.16-2.10 (m, 2H, **H-2'**, **H-2'\***).

**$^{13}\text{C}$ -NMR:** (75 MHz,  $\text{CD}_3\text{OD}$ )  $\delta$  (ppm) 165.7 (**C-4**), 157.7 (**C-2**), 140.6 (**C-6**), 139.1 (139.0) (**CH=CH<sub>2</sub>**), 116.51 (116.45) (**CH=CH<sub>2</sub>**), 109.5 (**C-5**), 88.9 (**C-4'**), 87.6 (**C-1'**), 71.87 (71.85) (**C-3'**), 70.8 (70.70) (**CH-OH**), 62.6 (**C-5'**), 42.13 (42.09) (**C-2'**).

**HR-MS:** (ESI positive, MeOH),  $[\text{M}+\text{H}]^+$  calcd for  $\text{C}_{12}\text{H}_{18}\text{N}_3\text{O}_5$ : 284.12410, found: 284.12412,  $[\text{M}+\text{Na}]^+$  calcd for  $\text{C}_{12}\text{H}_{17}\text{N}_3\text{O}_5\text{Na}$ : 306.10604, found: 306.10606.

**3',5'-Di(*tert*-butyldimethylsilyl)-*N*<sup>4</sup>-(2,2,2-trichloro-*tert*-butyloxycarbonyl)-5-formyl-2'-deoxycytidine (**4**)**

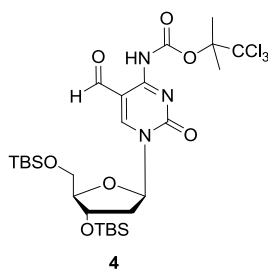

To a solution of aldehyde **1** (0.500 g, 1.03 mmol, 1.0 equiv) in DCM (4.00 mL) pyridine (100  $\mu$ L, 1.24 mmol, 1.2 equiv) was added. The reaction mixture was cooled to 0  $^{\circ}\text{C}$  whereby the solution of TCBocCl (0.300 g, 1.25 mmol, 1.2 equiv) in DCM (2.00 mL) was added dropwise. The resulting clear solution was warmed to room temperature and stirred overnight. Subsequently it was poured into ice. After the phases were separated and the aqueous layer was extracted with DCM (3  $\times$  5 mL), the combined organic phases were washed several times with saturated aqueous  $\text{CuSO}_4$  solution and dried over  $\text{MgSO}_4$ . The solvents were removed under reduced pressure. The crude product was purified by column chromatography (Hex/EtOAc, 6:1  $\rightarrow$  1:1 v/v) to yield **4** (395 mg, 5.75  $\mu$ mol, 56%) as a yellow solid.

**R<sub>f</sub>:** 0.48 (Hex/EtOAc = 2:1 v/v).

**IR:** ( $\text{CCl}_4$ )  $\nu_{\max}$  = 2954, 2857, 1778, 1663, 1564, 1489, 1386, 1254, 1142, 1029, 837, 782  $\text{cm}^{-1}$ .

**$^1\text{H}$ -NMR:** (400 MHz,  $\text{CDCl}_3$ )  $\delta$  (ppm) 10.63 (s, 1H, **NH**), 9.46 (s, 1H, **CHO**), 8.71 (s, 1H, **H-6**), 6.19 (dd,  $J$  = 6.0, 6.0 Hz, 1H, **H-1'**), 4.35-4.32 (m, 1H, **H-3'**), 4.10-4.07 (m, 1H, **H-4'**), 3.98 (dd,  $J$  = 11.7, 2.5 Hz, 1H, **H-5'**), 3.78 (dd,  $J$  = 11.7, 2.5 Hz, 1H, **H-5'**), 2.71-2.65 (m, 1H,

**H-2'**), 2.13-2.06 (m, 1H, **H-2'**), 2.00-1.99 (m, 6H, C(CH<sub>3</sub>)<sub>2</sub>), 0.89 (s, 18H, 2xSi-C(CH<sub>3</sub>)<sub>3</sub>), 0.10 (s, 3H, Si-CH<sub>3</sub>), 0.07 (s, 6H, 2xSi-CH<sub>3</sub>), 0.06 (s, 3H, Si-CH<sub>3</sub>).

**<sup>13</sup>C-NMR:** (75 MHz, CDCl<sub>3</sub>) δ (ppm) 187.3 (CHO), 159.8 (C-2), 154.0 (NHCOO), 152.5 (C-6), 147.2 (C-4), 105.2 (CCl<sub>3</sub>), 90.3 (C-5), 89.2 (C-4'), 88.7 (C-1'), 71.6 (C-3'), 62.7 (C-5'), 42.9 (C-2'), 26.1 (Si-C(CH<sub>3</sub>)<sub>3</sub>), 25.9 (Si-C(CH<sub>3</sub>)<sub>3</sub>), 21.6 (C(CH<sub>3</sub>)), 21.5 (C(CH<sub>3</sub>)) 18.6 (Si-C(CH<sub>3</sub>)<sub>3</sub>), 18.1 (Si-C(CH<sub>3</sub>)<sub>3</sub>), -4.4 (Si-CH<sub>3</sub>), -4.8 (Si-CH<sub>3</sub>), -5.1 (Si-CH<sub>3</sub>), -5.2 (Si-CH<sub>3</sub>). C(CH<sub>3</sub>)<sub>2</sub> is not observed.

**HR-MS:** (ESI positive, CHCl<sub>3</sub>/MeOH), [M+H]<sup>+</sup> calcd for C<sub>27</sub>H<sub>47</sub>Cl<sub>3</sub>N<sub>3</sub>O<sub>7</sub>Si<sub>2</sub>: 686.20126, found: 686.20085.

**Melting range:** 46 °C - 48 °C.

**Optical rotation:**  $[\alpha]_D^{24}(\text{deg cm}^3 \text{ g}^{-1} \text{ dm}^{-1}) = +26.8$  (c = 1.0, CHCl<sub>3</sub>).

**3',5'-(*tert*-Butyldimethylsilyl)-N<sup>4</sup>, N<sup>4</sup>-bis(2,2,2-trichloro-*tert*-butyloxycarbonyl)-5-formyl-2'-deoxycytidine (**5**)**

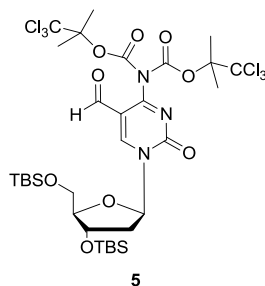

To a solution of aldehyde **1** (1.50 g, 3.10 mmol, 1.0 equiv) in DCM (44.0 mL) and pyridine (30.0 mL) a solution of TCBOC-Cl (5.22 g, 21.7 mmol, 7.0 equiv) in DCM (12.0 mL) was added dropwise at room temperature. After stirring at this temperature overnight the reaction mixture was poured into ice. After phase separation, the aqueous layer was extracted with DCM (3 × 30 mL). The combined organic phases were washed with brine and dried over MgSO<sub>4</sub>. The solvents were removed under reduced pressure. The crude product was purified by column chromatography (Hex/EtOAc, 20:1 → 1:1 v/v) to yield **5** (1.39 g, 1.56 mmol, 50%) as a yellow solid.

**R<sub>f</sub>:** 0.61 (Hex/EtOAc = 2:1 v/v).

**IR:** (KBr) ν<sub>max</sub> = 3441, 2954, 1819, 1686, 1520, 1389, 1289, 1110, 838, 792 cm<sup>-1</sup>.

**<sup>1</sup>H-NMR:** (400 MHz, CDCl<sub>3</sub>) δ (ppm) 9.62 (s, 1H, CHO), 8.90 (s, 1H, **H-6**), 6.19 (dd, J = 5.8, 5.8 Hz, 1H, **H-1'**), 4.37-4.41 (m, 1H, **H-3'**), 4.06-4.08 (m, 1H, **H-4'**), 3.99 (dd, J = 11.6, 2.9 Hz, 1H, **H-5'**), 3.81 (dd, J = 11.6, 2.9 Hz, 1H, **H-5'**), 2.62-2.68 (m, 1H, **H-2'**), 2.03-2.09 (m, 1H, **H-2'**), 1.92-1.91 (m, 12H, 2xC(CH<sub>3</sub>)<sub>2</sub>), 0.92 (s, 9H, Si-C(CH<sub>3</sub>)<sub>3</sub>), 0.90 (s, 9H, Si-C(CH<sub>3</sub>)<sub>3</sub>), 0.12 (s, 3H, Si-CH<sub>3</sub>), 0.11 (s, 9H, 3xSi-CH<sub>3</sub>);



**$^{13}\text{C}$ -NMR:** (100 MHz,  $\text{CDCl}_3$ )  $\delta$  (ppm) 183.3 (**CHO**), 160.9 (**C-2**), 153.6 (**NCOO**), 152.0 (**C-6**), 146.1 (**C-4**), 113.5, 105.4 (**CCl<sub>3</sub>**), 91.7, 88.8 (**C-4'**), 88.3 (**C-1'**), 70.3 (**C-3'**), 62.1 (**C-5'**), 42.4 (**C-2'**), 26.2 (**Si-C(CH<sub>3</sub>)<sub>3</sub>**), 25.8 (**Si-C(CH<sub>3</sub>)<sub>3</sub>**), 21.39 (**C(CH<sub>3</sub>)<sub>2</sub>**), 21.36 (**C(CH<sub>3</sub>)<sub>2</sub>**), 18.7 (**Si-C(CH<sub>3</sub>)<sub>3</sub>**), 18.1 (**Si-C(CH<sub>3</sub>)<sub>3</sub>**), -4.4 (**Si-CH<sub>3</sub>**), -4.7 (**Si-CH<sub>3</sub>**), -4.9 (**Si-CH<sub>3</sub>**), -5.2 (**Si-CH<sub>3</sub>**).

**HR-MS:** (ESI positive,  $\text{CHCl}_3/\text{MeOH}$ ),  $[\text{M}+\text{Na}]^+$  calcd for  $\text{C}_{32}\text{H}_{51}\text{Cl}_3\text{N}_3\text{O}_9\text{Si}_2\text{Na}$ : 910.11872, found: 910.11808.

**Melting range:** 64 °C-66 °C.

**Optical rotation:**  $[\alpha]_{\text{D}}^{24} (\text{deg cm}^3 \text{ g}^{-1} \text{ dm}^{-1}) = +31.6$  ( $c = 1.0$ ,  $\text{CHCl}_3$ ).

**3',5'-Di(*tert*-butyldimethylsilyl)-*N*<sup>4</sup>-(2,2,2-trichloro-*tert*-butyloxycarbonyl)-5-(1-hydroxyethyl)-2'-deoxycytidine (**6a**) and 6-((2*R*,4*S*,5*R*)-4-(*tert*-butyldimethylsilyloxy)-5-((*tert*-butyldimethylsilyloxy)methyl)tetrahydrofuran-2-yl)-4-methyl-1*H*-pyrimido[4,5-*d*][1,3]oxazine-2,7(4*H*,6*H*)-dione (**7a**)**

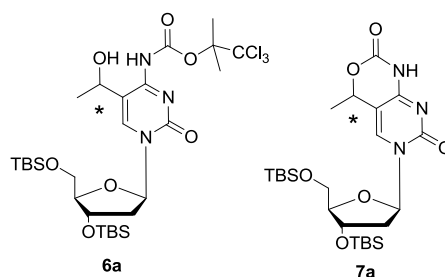

To an ice-cooled solution of aldehyde **4** (81.0 mg, 118  $\mu\text{mol}$ , 1.0 equiv) in THF (3.00 mL) methylmagnesium bromide (3.0 M in  $\text{Et}_2\text{O}$ ; 78.0  $\mu\text{L}$ , 236  $\mu\text{mol}$ , 2.0 equiv) was added dropwise and the solution was allowed to warm to room temperature. After one hour the reaction mixture was cooled down to 0 °C and an additional amount of methylmagnesium bromide (3.0 M in  $\text{Et}_2\text{O}$ ; 78.0  $\mu\text{L}$ , 236  $\mu\text{mol}$ , 2.0 equiv) was added dropwise. The reaction mixture was stirred overnight at room temperature. Afterwards the reaction was quenched with saturated aqueous  $\text{NH}_4\text{Cl}$  (5 mL) and diluted with DCM (5 mL). The phases were separated and the aqueous layer was extracted with DCM ( $2 \times 5$  mL). The combined organic layers were washed with brine (10 mL), dried over  $\text{MgSO}_4$  and the solvents were removed under reduced pressure. The crude product was purified by column chromatography (Hex/ $\text{EtOAc}$ , 20:1  $\rightarrow$  2:1  $v/v$  and then DCM/ $\text{MeOH}$ , 30:1  $\rightarrow$  15:1  $v/v$ ) to yield a mixture of diastereomeric alcohols **6a** (23 mg, 32.7  $\mu\text{mol}$ , 28%) as yellow oil (a ratio could not be calculated) and a mixture of diastereomers **7a** with a ratio of 1.9:1 (22 mg, 41.8  $\mu\text{mol}$ , 35%) as a slight yellow oil.

**6a:**

**R<sub>f</sub>:** 0.57 (Hex/ $\text{EtOAc}$  = 3:1  $v/v$ ).

Due to spontaneous cyclisation of **6a** to **7a**  $^1\text{H}$ -NMR spectrum of **6a** contains compound **7a**.

**$^1\text{H}$ -NMR:** (300 MHz,  $\text{CDCl}_3$ )  $\delta$  (ppm) 12.05 (s, 2H), 7.60 (s, 1H, **H-6**), 7.59 (s, 1H, **H-6\***), 6.28-6.21 (m, 2H, **H-1'**, **H-1'\***), 4.72-4.67 (m, 2H, **CH-CH<sub>3</sub>**, **CH\*-CH<sub>3</sub>**), 4.40-4.36 (m, 2H,

**H-3', H-3'\***), 4.00-3.97 (m, 2H, **H-4', H-4'\***), 3.81-3.77 (m, 4H, **H-5', H-5'\***), 2.39-2.30 (m, 2H, **H-2', H-2'\***), 2.07-1.95 (m, 14H, **H-2', H-2'\***, C(CH<sub>3</sub>)<sub>2</sub>, C(CH<sub>3</sub>)<sub>2</sub>\*), 1.50-1.46 (m, 3H, CH-CH<sub>3</sub>, CH-CH<sub>3</sub>\*), 0.91 (s, 18H, Si-C(CH<sub>3</sub>)<sub>3</sub>, Si-C(CH<sub>3</sub>)<sub>3</sub>\*), 0.89 (s, 18H, Si-C(CH<sub>3</sub>)<sub>3</sub>, Si-C(CH<sub>3</sub>)<sub>3</sub>\*), 0.10 (s, 12H, Si-(CH<sub>3</sub>)<sub>2</sub>, Si-(CH<sub>3</sub>)<sub>2</sub>\*), 0.08-0.07 (m, 12H, Si-(CH<sub>3</sub>)<sub>2</sub>, Si-(CH<sub>3</sub>)<sub>2</sub>\*).

**HR-MS:** (ESI positive, CHCl<sub>3</sub>/MeOH), [M+H]<sup>+</sup> calcd for C<sub>28</sub>H<sub>51</sub>Cl<sub>3</sub>N<sub>3</sub>O<sub>7</sub>Si<sub>2</sub>: 702.23256, found: 702.23273.

**7a:**

**R<sub>f</sub>:** 0.24 (DCM/MeOH = 30:1 v/v).

**IR:** (CCl<sub>4</sub>) ν<sub>max</sub> = 2929, 2857, 1758, 1669, 1561, 1489, 1362, 1254, 1077, 837, 780, 668 cm<sup>-1</sup>.

**<sup>1</sup>H-NMR:** (300 MHz, CDCl<sub>3</sub>) δ (ppm) 8.38 (bs, 2H, **NH, NH\***), 8.00 (d, *J* = 1.1 Hz, 1H, **H-6**), 7.94 (d, *J* = 1.2 Hz, 1H, **H-6\***), 6.24-6.17 (m, 2H, **H-1', H-1'\***), 5.36-5.28 (m, 2H, CH-CH<sub>3</sub>, CH\*-CH<sub>3</sub>), 4.37-4.30 (m, 2H, **C-3', C-3'\***), 4.08-3.99 (m, 2H, **C-4', C-4'\***), 3.93-3.84 (m, 2H, **C-5', C-5'\***), 3.78-3.73 (m, 2H, **C-5', C-5'\***), 2.64-2.56 (m, 2H, **C-2', C-2'\***), 2.03-1.89 (m, 2H, **C-2', C-2'\***), 1.65 (d, *J* = 1.0 Hz, 3H, CH-CH<sub>3</sub>), 1.62 (d, *J* = 0.8 Hz, 3H, CH-CH<sub>3</sub>\*), 0.90-0.88 (m, 36H, 2xSi-C(CH<sub>3</sub>)<sub>3</sub>, 2xSi-C(CH<sub>3</sub>)<sub>3</sub>\*), 0.09-0.06 (m, 24H, 2xSi-(CH<sub>3</sub>)<sub>2</sub>, 2xSi-(CH<sub>3</sub>)<sub>2</sub>\*).

**<sup>13</sup>C-NMR:** (75 MHz, CDCl<sub>3</sub>) δ (ppm) 159.1 (158.9) (**C-4**), 154.6 (**C-2**), 149.8 (149.6) (NHCOO), 138.4 (138.1) (**C-6**), 101.6 (101.3) (**C-5**), 88.8 (88.7) (**C-4'**), 88.0 (87.7) (**C-1'**), 72.9 (72.7), 72.1 (72.0), 63.0 (62.9) (**C-5'**), 42.8 (42.7) (**C-2'**), 26.1 (26.0) (Si-C(CH<sub>3</sub>)<sub>3</sub>), 25.9 (Si-C(CH<sub>3</sub>)<sub>3</sub>), 20.9 (20.3) (CH-CH<sub>3</sub>), 18.6 (18.50) (Si-C(CH<sub>3</sub>)<sub>3</sub>), 18.14 (18.12) (Si-C(CH<sub>3</sub>)<sub>3</sub>), -4.4 (-4.5) (Si-CH<sub>3</sub>), -4.8 (Si-CH<sub>3</sub>), -5.1 (-5.2) (Si-CH<sub>3</sub>), -5.3 (Si-CH<sub>3</sub>).

**HR-MS:** (ESI positive, MeOH), [M+Na]<sup>+</sup> calcd for C<sub>24</sub>H<sub>43</sub>N<sub>3</sub>O<sub>6</sub>Si<sub>2</sub>Na: 548.25826, found: 548.25858, [2M+Na]<sup>+</sup> calcd for C<sub>48</sub>H<sub>86</sub>N<sub>6</sub>O<sub>12</sub>Si<sub>4</sub>Na: 1073.52730, found: 1073.52735.

**3',5'-Di(*tert*-butyldimethylsilyl)-*N*<sup>4</sup>-(2,2,2-trichloro-*tert*-butyloxycarbonyl)-5-(1-hydroxy-3-(trimethylsilyl)prop-2-ynyl)-2'-deoxycytidine (6b) and 6-((2*R*,4*S*,5*R*)-4-(*tert*-butyldimethylsilyloxy)-5-((*tert*-butyldimethylsilyloxy)methyl)tetrahydrofuran-2-yl)-4-((trimethylsilyl)ethynyl)-1*H*-pyrimido[4,5-*d*][1,3]oxazine-2,7(4*H*,6*H*)-dione (7b)**

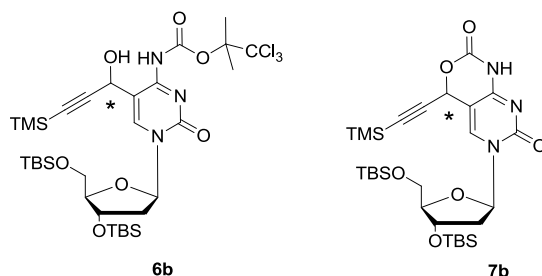

To a stirred solution of trimethylsilylacetylene (124 μL, 873 μmol, 4.0 equiv) in THF (1.50 mL) *n*-BuLi (2.5 M in *n*-hexane; 349 μL, 873 μmol, 4.0 equiv) was added dropwise at -40 °C. The reaction mixture was stirred at this temperature for one hour. After the reaction mixture was cooled down to -60 °C a solution of aldehyde **4** (150 mg, 218 μmol, 1.0 equiv) in THF

(1.50 mL) was added dropwise. The reaction mixture was stirred at  $-60\text{ }^{\circ}\text{C}$  for two and a half hours and thereafter at  $-50\text{ }^{\circ}\text{C}$  for 30 min. The reaction was quenched with saturated aqueous  $\text{NH}_4\text{Cl}$  (5 mL), diluted with DCM (5 mL) and the aqueous layer was extracted with DCM ( $3 \times 5\text{ mL}$ ). The combined organic phases were washed with brine, dried over  $\text{MgSO}_4$  and the solvents were removed under reduced pressure. Purification by silica gel chromatography (Hex/EtOAc, 20:1  $\rightarrow$  1:1 v/v and then DCM/MeOH, 30:1  $\rightarrow$  15:1 v/v) yielded a mixture of diastereomeric alcohols **6b** with a ratio of 2:1 (72.0 mg, 91.7  $\mu\text{mol}$ , 42%) as a yellow oil and a mixture of diastereomers **7b** with a ratio of 1.1:1 (40.0 mg, 65.8  $\mu\text{mol}$ , 30%) as a yellow oil.

#### **6b:**

**R<sub>f</sub>**: 0.55 (Hex/EtOAc = 3:1 v/v).

**IR**: ( $\text{CCl}_4$ )  $\nu_{\text{max}}$  = 3337, 2955, 2858, 1769, 1666, 1564, 1472, 1371, 1253, 1030, 840, 786  $\text{cm}^{-1}$ .

**$^1\text{H}$ -NMR**: (400 MHz,  $\text{CDCl}_3$ )  $\delta$  (ppm) 12.02 (bs, 2H), 7.94 (s, 1H, **H-6**), 7.90 (s, 1H, **H-6\***), 6.19-6.12 (m, 2H, **H-1'**, **H-1'\***), 5.38 (s, 1H, **CH-OH**), 5.31 (s, 1H, **CH\*-OH**), 4.37-4.35 (m, 2H, **H-3'**, **H-3'\***), 4.05-4.01 (m, 2H, **H-4'**, **H-4'\***), 3.80-3.71 (m, 4H, **H-5'**, **H-5'\***), 2.46-2.43 (m, 2H, **H-2'**, **H-2'\***), 2.09-2.01 (m, 2H, **H-2'**, **H-2'\***), 1.95 (s, 12H,  $\text{C}(\text{CH}_3)_2$ ,  $\text{C}(\text{CH}_3)_2^*$ ), 0.90 (s, 36H,  $2 \times \text{Si}-\text{C}(\text{CH}_3)_3$ ,  $2 \times \text{Si}-\text{C}(\text{CH}_3)_3^*$ ), 0.19 (s, 18H,  $\text{Si}-(\text{CH}_3)_3$ ,  $\text{Si}-(\text{CH}_3)_3^*$ ), 0.09-0.08 (m, 24H,  $2 \times \text{Si}-(\text{CH}_3)_2$ ,  $2 \times \text{Si}-(\text{CH}_3)_2^*$ ).

In  $^{13}\text{C}$ -NMR spectrum of **6b** signals of **7b** could be observed due to spontaneous cyclisation of diastereomeric alcohols **6b**.

**$^{13}\text{C}$ -NMR**: (100 MHz,  $\text{CDCl}_3$ )  $\delta$  (ppm) 159.6, 147.2, 138.3, 112.7, 106.3, 102.5, 97.7, 96.9, 92.1, 88.8, 87.4, 73.12 (72.8), 63.5, 60.5, 41.7, 26.0, 25.9, 21.43, 21.40, 18.5, 18.1, 0.01, -4.50, -4.69, -5.14, -5.18.

**HR-MS**: (ESI positive,  $\text{CHCl}_3/\text{MeOH}$ ),  $[\text{M}+\text{H}]^+$  calcd for  $\text{C}_{32}\text{H}_{57}\text{Cl}_3\text{N}_3\text{O}_7\text{Si}_3$ : 784.25644, found: 784.25647,  $[\text{M}+\text{Na}]^+$  calcd for  $\text{C}_{32}\text{H}_{56}\text{Cl}_3\text{N}_3\text{O}_7\text{Si}_3\text{Na}$ : 806.23838, found: 806.23818.

#### **7b:**

**R<sub>f</sub>**: 0.27 (DCM/MeOH = 30:1 v/v).

**IR**: ( $\text{CCl}_4$ )  $\nu_{\text{max}}$  = 3186, 2929, 2857, 1766, 1673, 1564, 1491, 1362, 1316, 1252, 1058, 840, 780, 669  $\text{cm}^{-1}$ .

**$^1\text{H}$ -NMR**: (300 MHz,  $\text{CDCl}_3$ )  $\delta$  (ppm) 8.22 (s, 1H, **H-6**), 8.19 (s, 1H, **H-6\***), 6.21-6.14 (m, 2H, **H-1'**, **H-1'\***), 5.81 (d,  $J = 1.0\text{ Hz}$ , 1H, **CH\*-C $\equiv$ C-TMS**), 5.80 (d,  $J = 0.9\text{ Hz}$ , 1H, **CH\*-C $\equiv$ C-TMS**), 4.57 (bs, 2H), 4.35-4.32 (m, 2H, **H-3'**, **H-3'\***), 4.10-4.07 (m, 1H, **H-4'**), 4.10-4.03 (m, 1H, **H-4'\***), 3.89-3.84 (m, 2H, **H-5'**, **H-5'\***), 3.80-3.74 (m, 2H, **H-5'**, **H-5'\***), 2.73-2.56 (m, 2H, **H-2'**, **H-2'\***), 2.08-1.98 (m, 2H, **H-2'**, **H-2'\***), 0.91-0.88 (m, 36H,  $2 \times \text{Si}-\text{C}(\text{CH}_3)_3$ ,  $2 \times \text{Si}-\text{C}(\text{CH}_3)_3^*$ ), 0.20 (s, 9H,  $\text{Si}-(\text{CH}_3)_3$ ), 0.19 (s, 9H,  $\text{Si}-(\text{CH}_3)_3^*$ ), 0.09-0.07 (m, 24H,  $2 \times \text{Si}-(\text{CH}_3)_2$ ,  $2 \times \text{Si}-(\text{CH}_3)_2^*$ ).

**$^{13}\text{C}$ -NMR**: (75 MHz,  $\text{CDCl}_3$ )  $\delta$  (ppm) 158.7 (**C-4**), 154.6 (**C-2**), 148.7 (**NHCOO**), 140.1 (**C-6**), 97.9 (**C-5**), 97.0 (**C $\equiv$ C-TMS**), 96.5 (**C $\equiv$ C-TMS**), 89.1 (**C-4'**), 88.6 (**C-1'**), 72.3 (72.0) (**C-3'**), 66.2 (65.9) (**CH-C $\equiv$ C-TMS**), 63.0 (**C-5'**), 42.8 (**C-2'**), 26.2 (26.1) ( $\text{Si}-\text{C}(\text{CH}_3)_3$ ), 26.0

(25.9) (Si-C(CH<sub>3</sub>)<sub>3</sub>), 18.4 (18.1) (Si-C(CH<sub>3</sub>)<sub>3</sub>), - 0.029 (-0.351) (Si-(CH<sub>3</sub>)<sub>3</sub>), -4.4 (Si-CH<sub>3</sub>), -4.8 (Si-CH<sub>3</sub>), -5.2 (Si-CH<sub>3</sub>), -5.3 (Si-CH<sub>3</sub>).

**HR-MS:** (ESI positive, MeOH), [M+Na]<sup>+</sup> calcd for C<sub>28</sub>H<sub>49</sub>N<sub>3</sub>O<sub>6</sub>Si<sub>3</sub>Na: 630,28269, found: 630.28187.

**3',5'-Di(*tert*-butyldimethylsilyl)-*N*<sup>4</sup>-(2,2,2-trichloro-*tert*-butyloxycarbonyl)-5-(1-hydroxy-3-phenylprop-2-ynyl)-2'-deoxycytidine (6c) and 6-((2*R*,4*S*,5*R*)-4-(*tert*-butyldimethylsilyloxy)-5-((*tert*-butyldimethylsilyloxy)methyl)tetrahydrofuran-2-yl)-4-(phenylethynyl)-1*H*-pyrimido[4,5-*d*][1,3]oxazine-2,7(4*H*,6*H*)-dione (7c)**

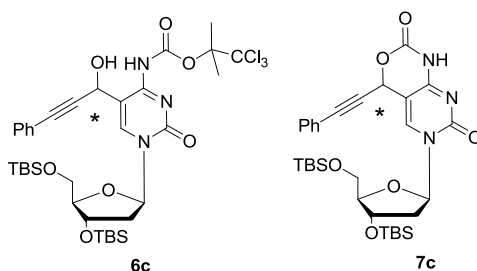

To a stirred solution of phenylacetylene (77.0  $\mu$ L, 698  $\mu$ mol, 4.0 equiv) in THF (1.50 mL) at  $-85^\circ\text{C}$  1.89 ml of *n*-BuLi (2.5 M in *n*-hexane; 279  $\mu$ L, 698  $\mu$ mol, 4.0 equiv) was added dropwise. Subsequently the temperature was increased to  $-40^\circ\text{C}$  in the course of 1 hour and lowered to  $-78^\circ\text{C}$ . A solution of aldehyde **4** (120 mg, 175  $\mu$ mol, 1.0 equiv) in THF (3.00 mL) was added dropwise and this mixture stirred for one hour. The reaction mixture was quenched with saturated aqueous NH<sub>4</sub>Cl (5 mL), diluted with DCM (5 mL) and the aqueous layer was extracted with DCM (3  $\times$  5 mL). The combined organic phases were washed with brine (10 mL), dried over MgSO<sub>4</sub> and the solvents were rotary evaporated. Purification by silica gel chromatography (Hex/EtOAc, 20:1  $\rightarrow$  2:1 *v/v* and then DCM/MeOH, 30:1  $\rightarrow$  15:1 *v/v*) yielded a mixture of diastereomeric alcohols **6c** with a ratio of 1.6:1 (58.0 mg, 73.5  $\mu$ mol, 47% brsm) as a yellow oil and a mixture of diastereomers **7c** with a ratio of 1.4:1 (32.0 mg, 52.3  $\mu$ mol, 34% brsm) as an orange solid. And 14.0 mg (2.04  $\mu$ mol, 12%) of recovered starting material.

**6c:**

**R<sub>f</sub>:** 0.18 (Hex/EtOAc = 4:1 *v/v*)

**IR:** (CCl<sub>4</sub>)  $\nu_{\text{max}}$  = 3390, 2929, 1770, 1664, 1562, 1255, 1148, 1028, 837, 781 cm<sup>-1</sup>.

**<sup>1</sup>H-NMR:** (300 MHz, CDCl<sub>3</sub>)  $\delta$  (ppm) 12.04 (bs, 2H), 8.01 (s, 2H, **H-6**, **H-6\***), 7.49-7.42 (m, 4H, **CH** aromat., **CH\*** aromat.), 7.37-7.28 (m, 6H, **CH** aromat., **CH\*** aromat.), 6.23-6.15 (m, 2H, **H-1'**, **H-1'\***), 5.61 (s, 1H, **CH-C $\equiv$ C-Ph**), 5.57 (s, 1H, **CH\*-C $\equiv$ C-Ph**) 4.37-4.33 (m, 2H, **H-3'**, **H-3'\***), 4.03-3.99 (m, 2H, **H-4'**, **H-4'\***), 3.73-3.58 (m, 4H, **H-5'**, **H-5'\***), 2.50-2.40 (m, 2H, **H-2'**, **H-2'\***), 2.06-1.99 (m, 2H, **H-2'**, **H-2'\***), 1.96 (s, 12H, C(CH<sub>3</sub>)<sub>2</sub>, C(CH<sub>3</sub>)<sub>2</sub>\*), 0.89 (s, 18H, Si-C(CH<sub>3</sub>)<sub>3</sub>, Si-C(CH<sub>3</sub>)<sub>3</sub>\*), 0.85-0.84 (m, 18H, Si-C(CH<sub>3</sub>)<sub>3</sub>, Si-C(CH<sub>3</sub>)<sub>3</sub>\*), 0.07-0.06 (m, 12H, Si-(CH<sub>3</sub>)<sub>2</sub>, Si-(CH<sub>3</sub>)<sub>2</sub>\*), 0.00-(-0.04) (m, 12H, Si-(CH<sub>3</sub>)<sub>2</sub>, Si-(CH<sub>3</sub>)<sub>2</sub>\*).

**<sup>13</sup>C-NMR:** (100 MHz, CDCl<sub>3</sub>)  $\delta$  (ppm) 159.7, 147.2, 137.9, 131.9 131.8, 128.92, 128.88, 128.50, 128.47, 122.3, 113.1, 106.3, 89.1, 88.84, 88.75, 87.3, 87.2, 86.9, 86.2, 73.0 (72.9),

63.4 (63.3), 60.6 (60.4), 41.8 (41.6), 26.02 (26.0), 25.91, 25.85, 21.44 (21.42), 18.43 (18.42), 18.10 (18.09), -4.55, -4.73, -5.30, -5.42.

**HR-MS:** (ESI positive, MeOH),  $[M+Na]^+$  calcd for  $C_{35}H_{52}Cl_3N_3O_7Si_2Na$ : 810.23071, found: 810.22997.

**7c:**

**R<sub>f</sub>:** 0.24 (DCM/MeOH = 30:1 v/v).

**IR:** (CCl<sub>4</sub>)  $\nu_{max}$  = 2928, 2857, 1765, 1669, 1564, 1491, 1254, 1093, 1031, 837, 782, 603 cm<sup>-1</sup>.

**<sup>1</sup>H-NMR:** (300 MHz, CDCl<sub>3</sub>)  $\delta$  (ppm) 8.31 (s, 1H, **H-6**), 8.26 (s, 1H, **H-6\***), 7.45 (m, 4H, **CH** aromat., **CH\*** aromat.), 7.41-7.30 (m, 6H, **CH** aromat., **CH\*** aromat.), 6.23-6.18 (m, 2H, **H-1'**, **H-1'\***), 6.09 -6.07 (m, 2H, **CH-C $\equiv$ C-Ph**, **CH\*-C $\equiv$ C-Ph**), 4.35-4.32 (m, 2H, **H-3'**, **H-3'\***), 4.07-4.04 (m, 2H, **H-4'**, **H-4'\***), 3.88-3.80 (m, 2H, **H-5'**, **H-5'\***), 3.76-3.71 (m, 2H, **H-5'**, **H-5'\***), 2.69-2.59 (m, 2H, **H-2'**, **H-2'\***), 2.08-1.99 (m, 2H, **H-2'**, **H-2'\***), 0.88-0.87 (m, 18H, Si-C(CH<sub>3</sub>)<sub>3</sub>, Si-C(CH<sub>3</sub>)<sub>3</sub>\*), 0.86-0.85 (m, 18H, Si-C(CH<sub>3</sub>)<sub>3</sub>, Si-C(CH<sub>3</sub>)<sub>3</sub>\*), 0.08-0.05 (m, 12H, Si-(CH<sub>3</sub>)<sub>2</sub>, Si-(CH<sub>3</sub>)<sub>2</sub>\*), 0.03-0.01 (m, 12H, Si-(CH<sub>3</sub>)<sub>2</sub>, Si-(CH<sub>3</sub>)<sub>2</sub>\*).

**<sup>13</sup>C-NMR:** (100 MHz, CDCl<sub>3</sub>)  $\delta$  (ppm) 158.8 (**C-4**), 155.0 (**C-2**), 148.8 (NHCOO), 140.1 (139.7) (**C-6**), 132.3 (132.1) (**C** aromat.), 130.0 (129.9) (**C** aromat.), 128.7 (**C** aromat.), 120.7 (**C** aromat.), 98.2 (**C-5**), 90.2 (90.0), 89.1 (88.8), 88.5 (88.2), 81.7 (81.5), 72.2 (**C-3'**), 66.5 (66.3) (**CH-C $\equiv$ C-Ph**), 63.0 (62.9) (**C-5'**), 42.8 (42.6) (**C-2'**), 26.1 (26.0) Si-C(CH<sub>3</sub>)<sub>3</sub>, 26.0 (25.9) (Si-C(CH<sub>3</sub>)<sub>3</sub>), 18.5 (18.4) (Si-C(CH<sub>3</sub>)<sub>3</sub>), 18.1 (Si-C(CH<sub>3</sub>)<sub>3</sub>), -4.4 (-4.5) (Si-CH<sub>3</sub>), -4.76 (-4.78) (Si-CH<sub>3</sub>), -5.3 (Si-CH<sub>3</sub>), -5.35 (-5.37) (Si-CH<sub>3</sub>).

**HR-MS:** (ESI positive, MeOH),  $[M+Na]^+$  calcd for  $C_{31}H_{45}N_3O_6Si_2Na$ : 634.27391, found: 634.27421,  $[2M+Na]^+$  calcd for  $C_{62}H_{90}N_6O_{12}Si_4Na$ : 1245.55860, found: 1245.55822.

**6-((2*R*,4*S*,5*R*)-4-(*tert*-Butyldimethylsilyloxy)-5-((*tert*-butyldimethylsilyloxy)methyl)tetrahydrofuran-2-yl)-4-vinyl-1*H*-pyrimido[4,5-*d*][1,3]oxazine-2,7(4*H*,6*H*)-dione (7d)**

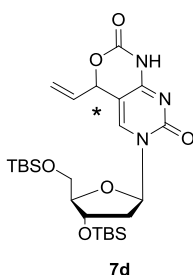

To an ice-cooled solution of aldehyde **4** (182 mg, 265  $\mu$ mol, 1.0 equiv) in THF (3.00 mL) vinylmagnesium bromide (0.7 M in THF; 757  $\mu$ L, 530  $\mu$ mol, 2.0 equiv) was added dropwise and the solution was stirred at 0 °C for 30 min. The reaction mixture was allowed to warm to room temperature whereby it was stirred for three hours. The reaction was quenched with saturated aqueous NH<sub>4</sub>Cl (5 mL) and diluted with Et<sub>2</sub>O (5 mL). After phase separation the aqueous layer was extracted with Et<sub>2</sub>O (2  $\times$  5 mL). The combined organic layers were washed with brine (10 mL), dried over MgSO<sub>4</sub> and the solvents were removed under reduced



purified by column chromatography (Hex/EtOAc, 20:1 → 2:1 v/v) to yield a mixture of diastereomers **8a** (24.0 mg, 34.1 mmol, 38%) with a ratio of 2.4:1 as a yellow oil.

**R<sub>f</sub>**: 0.23 (Hex/EtOAc = 10:1 v/v).

**IR**: (CCl<sub>4</sub>)  $\nu_{\max}$  = 2929, 1705, 1598, 1387, 1254, 1146, 836, 785 cm<sup>-1</sup>.

**<sup>1</sup>H-NMR**: (300 MHz, CDCl<sub>3</sub>)  $\delta$  (ppm) 11.87 (bs, 2H, NHCOO, NH\*COO), 9.59 (s, 1H, NH), 9.56 (s, 1H, NH\*), 9.07 (s, 1H, CHO), 9.06 (s, 1H, CHO\*), 6.18 (dd, *J* = 8.6, 5.7 Hz, 1H, H-1'), 6.10-6.02 (m, 1H, H-1'\*), 4.62 (q, *J* = 6.6 Hz, 1H, H-6\*), 4.46 (q, *J* = 6.4 Hz, 1H, H-6), 4.40-4.34 (m, 2H, H-3', H-3'\*), 3.86-3.82 (m, 1H, H-4'), 3.82-3.79 (m, 1H, H-4'\*), 3.74-3.70 (m, 4H, H-5', H-5'\*), 2.22-2.15 (m, 1H, H-2'\*), 2.13-2.01 (m, 2H, H-2', H-2'\*), 1.98-1.97 (m, 7H, H-2', C(CH<sub>3</sub>), C(CH<sub>3</sub>)\*), 1.96 (s, 6H, C(CH<sub>3</sub>), C(CH<sub>3</sub>)\*), 1.38 (d, *J* = 6.4 Hz, 3H, CH-CH<sub>3</sub>), 1.33-1.28 (m, 3H, CH-CH<sub>3</sub>\*), 0.91 (s, 18H, Si-C(CH<sub>3</sub>)<sub>3</sub>, Si-C(CH<sub>3</sub>)<sub>3</sub>\*), 0.89-0.88 (m, 18H, Si-C(CH<sub>3</sub>)<sub>3</sub>, Si-C(CH<sub>3</sub>)<sub>3</sub>\*), 0.09-0.06 (m, 24H, 2xSi-(CH<sub>3</sub>)<sub>2</sub>, 2xSi-(CH<sub>3</sub>)<sub>2</sub>\*).

**<sup>13</sup>C-NMR**: (75 MHz, CDCl<sub>3</sub>)  $\delta$  (ppm) 186.5 (186.4) (CHO), 151.7 (NHCOO), 150.3 (C-2), 147.5 (C-4), 105.1 (CCl<sub>3</sub>), 96.3 (96.2) (C-5), 91.2 (C(CH<sub>3</sub>)<sub>2</sub>), 87.0 (86.4) (C-4'), 85.4 (85.41) (C-1'), 72.7 (72.3) (C-3'), 63.6 (63.3) (C-5'), 46.7 (46.3) (C-6), 38.9 (C-2'), 26.11 (26.09) (Si-C(CH<sub>3</sub>)<sub>3</sub>), 26.0 (25.9) (Si-C(CH<sub>3</sub>)<sub>3</sub>), 24.7 (CH-CH<sub>3</sub>), 21.68 (21.66) (C(CH<sub>3</sub>)<sub>2</sub>), 21.64 (21.63) (C(CH<sub>3</sub>)<sub>2</sub>), 18.6 (Si-C(CH<sub>3</sub>)<sub>3</sub>), 18.2 (Si-C(CH<sub>3</sub>)<sub>3</sub>), -4.5 (Si-CH<sub>3</sub>), -4.60 (-4.62) (Si-CH<sub>3</sub>), -5.2 (Si-CH<sub>3</sub>), -5.27 (-5.29) (Si-CH<sub>3</sub>).

**HR-MS**: (ESI positive, CHCl<sub>3</sub>/MeOH), [M+H]<sup>+</sup> calcd for C<sub>28</sub>H<sub>51</sub>Cl<sub>3</sub>N<sub>3</sub>O<sub>7</sub>Si<sub>2</sub>: 702.23256, found: 702.23296, [M+Na]<sup>+</sup> calcd for C<sub>28</sub>H<sub>50</sub>Cl<sub>3</sub>N<sub>3</sub>O<sub>7</sub>Si<sub>2</sub>Na: 724.21451, found: 724.21520.

**3',5'-Di(*tert*-butyldimethylsilyl)-*N*<sup>4</sup>-(2,2,2-trichloro-*tert*-butyloxycarbonyl)-3,6-dihydro-5-formyl-6-(trimethylsilylethynyl)-2'-deoxycytidine (**8b**)**

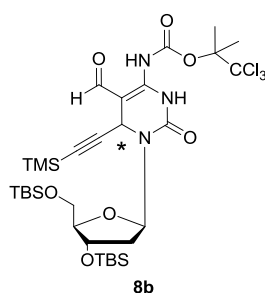

To a stirred solution of trimethylsilylacetylene (51.1  $\mu$ L, 359  $\mu$ mol, 4.0 equiv) in THF (0.60 mL) at -40 °C, *n*-BuLi (2.5 M in *n*-hexane; 144  $\mu$ L, 359  $\mu$ mol, 4.0 equiv) was added dropwise. The temperature was increased to -20 °C whereby the reaction mixture was stirred for one hour. Afterwards the temperature was lowered again to -40 °C. A solution of aldehyde **5** (80.0 mg, 89.8  $\mu$ mol, 1.0 equiv) in THF (1.50 mL) was added dropwise and the reaction mixture was stirred at -50 °C for three hours. The reaction mixture was quenched with saturated aqueous NH<sub>4</sub>Cl (3 mL), diluted with DCM (5 mL) and the aqueous layer extracted with DCM (3  $\times$  5 mL). The combined organic phases were washed with brine (10 mL), dried over MgSO<sub>4</sub> and the solvents were removed under reduced pressure. Purification by chromatography (Hex/EtOAc 30:1 → 15:1 v/v) afforded diastereomer **8b**.

(42.9 mg, 54.6  $\mu\text{mol}$ , 61%) as a yellow oil and diastereomer **8b\*** (13.6 mg, 17.3  $\mu\text{mol}$ , 19%) as a yellow oil. The total yield of the reaction is 80 % (56.5 mg, 91.7  $\mu\text{mol}$ ).

diastereomer **8b**

**R<sub>f</sub>**: 0.68 (Hex/EtOAc = 5:1 v/v).

**IR**: ( $\text{CCl}_4$ )  $\nu_{\text{max}}$  = 2926, 1715, 1666, 1603, 1463, 1252, 1140, 1030, 839, 777, 597  $\text{cm}^{-1}$ .

**<sup>1</sup>H-NMR**: (400 MHz,  $\text{CDCl}_3$ )  $\delta$  (ppm) 11.86 (s, 1H,  $\text{NHCOO}$ ), 9.65 (s, 1H,  $\text{NH}$ ), 9.13 (s, 1H,  $\text{CHO}$ ), 5.87 (dd,  $J$  = 7.8, 5.7 Hz, 1H, **H-1'**), 5.21 (s, 1H, **H-6**), 4.38–4.35 (m, 1H, **H-3'**), 3.92–3.89 (m, 1H, **H-4'**), 3.74–3.63 (m, 2H, **H-5'**), 2.28–2.21 (m, 1H, **H-2'**), 2.14–2.09 (m, 1H, **H-2'**), 1.98 (s, 3H,  $\text{C}(\text{CH}_3)_2$ ), 1.96 (s, 3H,  $\text{C}(\text{CH}_3)_2$ ), 0.91 (s, 9H,  $\text{Si-C}(\text{CH}_3)_3$ ), 0.89 (s, 9H,  $\text{Si-C}(\text{CH}_3)_3$ ), 0.13 (s, 9H,  $\text{Si-(CH}_3)_3$ ), 0.07 (m, 12H, 2 x  $\text{Si-(CH}_3)_2$ ).

**<sup>13</sup>C-NMR**: (100 MHz,  $\text{CDCl}_3$ )  $\delta$  (ppm) 186.4 ( $\text{CHO}$ ), 151.6 ( $\text{NHCOO}$ ), 149.7 (**C-2**), 147.9 (**C-4**), 105.1 ( $\text{CCl}_3$ ), 103.2 ( $\text{C}\equiv\text{C-TMS}$ ), 92.4 (**C-5**), 91.4 ( $\text{C}(\text{CH}_3)_2$ ), 88.6 ( $\text{C}\equiv\text{C-TMS}$ ), 87.7 (**C-4'**), 87.0 (**C-1'**), 73.0 (**C-3'**), 63.8 (**C-5'**), 43.5 (**C-6**), 39.5 (**C-2'**), 26.1 ( $\text{Si-C}(\text{CH}_3)_3$ ), 25.9 ( $\text{Si-C}(\text{CH}_3)_3$ ), 21.6 ( $\text{C}(\text{CH}_3)_2$ ), 18.6 ( $\text{Si-C}(\text{CH}_3)_3$ ), 18.1 ( $\text{Si-C}(\text{CH}_3)_3$ ), -0.01 ( $\text{Si-(CH}_3)_3$ ), -4.5 ( $\text{Si-CH}_3$ ), -4.6 ( $\text{Si-CH}_3$ ), -5.1 ( $\text{Si-CH}_3$ ), -5.1 ( $\text{Si-CH}_3$ ).

**HR-MS**: (ESI positive, DCM/MeOH),  $[\text{M}+\text{Na}]^+$  calcd for  $\text{C}_{32}\text{H}_{56}\text{Cl}_3\text{N}_3\text{O}_7\text{Si}_3\text{Na}$ : 806.23838, found: 806.23863.

**Optical rotation**:  $[\alpha]_{\text{D}}^{25}(\text{deg cm}^3 \text{ g}^{-1} \text{ dm}^{-1}) = +6.0$  ( $c$  = 1.0,  $\text{CHCl}_3$ ).

diastereomer **8b\***:

**R<sub>f</sub>**: 0.60 (Hex/EtOAc = 5:1 v/v).

**IR**: ( $\text{CCl}_4$ )  $\nu_{\text{max}}$  = 3326, 2928, 1712, 1667, 1602, 1463, 1386, 1252, 1141, 1027, 839, 778  $\text{cm}^{-1}$ .

**<sup>1</sup>H-NMR**: (400 MHz,  $\text{CDCl}_3$ )  $\delta$  (ppm) 11.84 (s, 1H,  $\text{NH}^*\text{COO}$ ), 9.66 (s, 1H,  $\text{NH}^*$ ), 9.10 (s, 1H,  $\text{CHO}^*$ ), 6.23 (dd,  $J$  = 8.3, 5.9 Hz, 1H, **H-1'\***), 5.38 (s, 1H, **H-6\***), 4.41–4.38 (m, 1H, **H-4'\***), 3.85–3.67 (m, 3H, **H-3'\***, **H-5'\***), 2.58–2.51 (m, 1H, **H-2'\***), 2.06–2.01 (m, 1H, **H-2'\***), 1.99 (s, 3H,  $\text{C}(\text{CH}_3)_2^*$ ), 1.97 (s, 3H,  $\text{C}(\text{CH}_3)_2^*$ ), 0.93 (s, 9H,  $\text{Si-C}(\text{CH}_3)_3^*$ ), 0.90 (s, 9H,  $\text{Si-C}(\text{CH}_3)_3^*$ ), 0.13 (s, 9H,  $\text{Si-(CH}_3)_3^*$ ), 0.11 (s, 3H,  $\text{Si-CH}_3^*$ ), 0.10 (s, 3H,  $\text{Si-CH}_3^*$ ), 0.08 (m, 6H,  $\text{Si-(CH}_3)_2^*$ ).

**<sup>13</sup>C-NMR**: (100 MHz,  $\text{CDCl}_3$ )  $\delta$  (ppm) 186.5 ( $\text{CHO}$ ), 151.7 ( $\text{NHCOO}$ ), 149.5 (**C-2**), 148.0 (**C-4**), 105.1 ( $\text{CCl}_3$ ), 104.4 ( $\text{C}\equiv\text{C-TMS}$ ), 92.5 (**C-5**), 91.4 ( $\text{C}(\text{CH}_3)_2$ ), 89.1 ( $\text{C}\equiv\text{C-TMS}$ ), 86.4 (**C-4'**), 84.4 (**C-1'**), 72.3 (**C-3'**), 63.3 (**C-5'**), 40.3 (**C-6**), 38.2 (**C-2'**), 26.2 ( $\text{Si-C}(\text{CH}_3)_3$ ), 25.9 ( $\text{Si-C}(\text{CH}_3)_3$ ), 21.7 ( $\text{C}(\text{CH}_3)_2$ ), 18.7 ( $\text{Si-C}(\text{CH}_3)_3$ ), 18.2 ( $\text{Si-C}(\text{CH}_3)_3$ ), -0.1 ( $\text{Si-(CH}_3)_3$ ), -4.4 ( $\text{Si-CH}_3$ ), -4.6 ( $\text{Si-CH}_3$ ), -5.1 ( $\text{Si-CH}_3$ ), -5.2 ( $\text{Si-CH}_3$ ).

**HR-MS**: (ESI positive, DCM/MeOH),  $[\text{M}+\text{Na}]^+$  calcd for  $\text{C}_{32}\text{H}_{56}\text{Cl}_3\text{N}_3\text{O}_7\text{Si}_3\text{Na}$ : 806.23838, found: 806.23854.

**Optical rotation**:  $[\alpha]_{\text{D}}^{22}(\text{deg cm}^3 \text{ g}^{-1} \text{ dm}^{-1}) = +10.14$  ( $c$  = 0.46,  $\text{CHCl}_3$ ).



**3',5'-Di(*tert*-butyldimethylsilyl)-*N*'-(2,2,2-trichloro-*tert*-butyloxycarbonyl)-3,6-dihydro-5-formyl-6-(2-phenylethynyl)-2'-deoxycytidine (**8c**)**

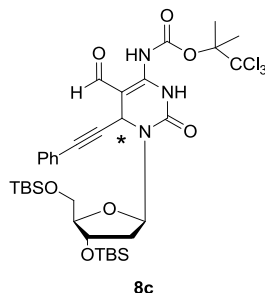

To a stirred solution of phenylacetylene (49.3  $\mu$ L, 449  $\mu$ mol, 4.0 equiv) in THF (1.50 mL) at  $-78^\circ\text{C}$  *n*-BuLi (2.5 M in *n*-hexane; 180  $\mu$ L, 449  $\mu$ mol, 4.0 equiv) was added dropwise, whereby the reaction mixture was stirred for 80 min. Subsequently a solution of aldehyde **5** (100 mg, 112  $\mu$ mol, 1.0 equiv) in THF (2.10 mL) was added dropwise. The temperature was increased to  $-50^\circ\text{C}$ , whereby the mixture was stirred for 140 min. The reaction mixture was quenched with saturated aqueous  $\text{NH}_4\text{Cl}$  (5 mL), diluted with DCM (5 mL) and the aqueous layer extracted with DCM ( $3 \times 5$  mL). The combined organic phases were washed with brine (10 mL), dried over  $\text{MgSO}_4$  and the solvents were removed under reduced pressure. Purification by silica gel chromatography (Hex/EtOAc, 20:1  $\rightarrow$  1:1 *v/v*) yielded a mixture of diastereomers **8c** with a ratio of 1.1:1 (63.0 mg, 79.8  $\mu$ mol, 71%) as a yellow oil.

**R<sub>f</sub>**: 0.26 (Hex/EtOAc = 10:1 *v/v*).

**IR**: ( $\text{CCl}_4$ )  $\nu_{\text{max}}$  = 3323, 2929, 1710, 1601, 1470, 1389, 1256, 1208, 1141, 1028, 837, 784, 690  $\text{cm}^{-1}$ .

**$^1\text{H}$ -NMR**: (400 MHz,  $\text{CDCl}_3$ )  $\delta$  (ppm) 11.88-11.87 (m, 2H,  $\text{NHCOO}$ ,  $\text{NH}^*\text{COO}$ ), 9.75-9.74 (m, 2H,  $\text{NH}$ ,  $\text{NH}^*$ ), 9.21 (s, 1H,  $\text{CHO}$ ), 9.19 (s, 1H,  $\text{CHO}^*$ ), 7.38-7.34 (m, 4H,  $\text{CH}$  arom.,  $\text{CH}^*$  arom.), 7.32-7.27 (m, 6H,  $\text{CH}$  arom.,  $\text{CH}^*$  arom.), 6.26 (dd,  $J = 7.8, 6.0$  Hz, 1H, **H-1'**), 6.03 (dd,  $J = 7.9, 5.7$  Hz, 1H, **H-1'**), 5.65 (s, 1H, **H-6'**), 5.46 (s, 1H, **H-6'**), 4.46-4.43 (m, 1H, **H-4'**), 4.39-4.38 (m, 1H, **H-3'**), 3.95-3.92 (m, 1H, **H-4'**), 3.86-3.82 (m, 2H, **H-5'**), 3.71-3.69 (m, 3H, **H-3'**, **H-5'**), 2.62-2.55 (m, 1H, **H-2'**), 2.27-2.20 (m, 1H, **H-2'**), 2.18-2.09 (m, 2H, **H-2'**, **H-2'**), 1.96-1.95 (m, 12H,  $\text{C}(\text{CH}_3)_2$ ,  $\text{C}(\text{CH}_3)_2^*$ ), 0.92 (s, 6H,  $\text{Si-C}(\text{CH}_3)_3$ ,  $\text{Si-C}(\text{CH}_3)_3^*$ ), 0.89-0.88 (m, 24H,  $2 \times \text{Si-C}(\text{CH}_3)_3$ ,  $2 \times \text{Si-C}(\text{CH}_3)_3^*$ ), 0.86 (s, 6H,  $\text{Si-C}(\text{CH}_3)_3$ ,  $\text{Si-C}(\text{CH}_3)_3^*$ ), 0.12-0.11 (m, 6H,  $\text{Si-CH}_3$ ,  $\text{Si-CH}_3^*$ ), 0.09-0.07 (m, 6H,  $\text{Si-CH}_3$ ,  $\text{Si-CH}_3^*$ ), 0.05-0.04 (m, 6H,  $\text{Si-CH}_3$ ,  $\text{Si-CH}_3^*$ ), 0.02 (s, 6H,  $\text{Si-CH}_3$ ,  $\text{Si-CH}_3^*$ ).

**$^{13}\text{C}$ -NMR**: (100 MHz,  $\text{CDCl}_3$ )  $\delta$  (ppm) 186.4 (186.3) ( $\text{CHO}$ ), 151.61 (151.58) ( $\text{NHCOO}$ ), 150.0 (149.5) (**C-2**), 148.2 (148.0) (**C-4**), 131.9 (131.7) ( $\text{C}$  arom.), 128.9 (128.7) ( $\text{C}$  arom.), 128.5 (128.3) ( $\text{C}$  arom.), 122.3 (122.0) ( $\text{C}$  arom.), 105.0 ( $\text{CCl}_3$ ), 92.65 (92.62) (**C-5**), 91.4 ( $\text{C}(\text{CH}_3)_2$ ), 88.2, 87.7, 87.4, 86.5, 86.4, 84.4, 84.0, 83.6, 81.3, 72.8 (72.0) (**C-3'**), 63.7 (63.2) (**C-5'**), 42.9 (40.2) (**C-6**), 39.6 (38.6) (**C-2'**), 26.2 (26.1) ( $\text{Si-C}(\text{CH}_3)_3$ ), 25.91 (25.88) ( $\text{Si-C}(\text{CH}_3)_3$ ), 21.7 (21.6) ( $\text{C}(\text{CH}_3)_2$ ), 21.64 (21.59) ( $\text{C}(\text{CH}_3)_2$ ), 18.7 (18.1) ( $\text{Si-C}(\text{CH}_3)_3$ ), 18.6 (18.1) ( $\text{Si-C}(\text{CH}_3)_3$ ), -4.49 (-4.54) ( $\text{Si-CH}_3$ ), -4.63 (-4.71) ( $\text{Si-CH}_3$ ), -5.1 (-5.2) ( $\text{Si-CH}_3$ ), -5.2 (-5.3) ( $\text{Si-CH}_3$ ).

**HR-MS:** (ESI positive, DCM/MeOH),  $[M+Na]^+$  calcd for  $C_{35}H_{52}Cl_3N_3O_7Si_2Na$ : 810.23016, found: 810.22984.

**3',5'-Di(*tert*-butyldimethylsilyl)-*N*<sup>4</sup>-(2,2,2-trichloro-*tert*-butyloxycarbonyl)-3,6-dihydro-5-formyl-6-vinyl-2'-deoxycytidine (8d) and 3',5'-Di(*tert*-butyldimethylsilyl)-*N*<sup>4</sup>,*N*<sup>4</sup>-bis(2,2,2-trichloro-*tert*-butyloxycarbonyl)-3,6-dihydro-5-formyl-6-vinyl-2'-deoxycytidine (8e)**

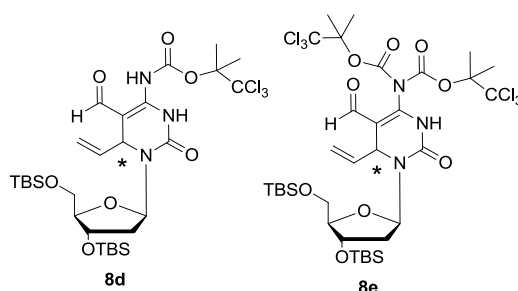

To an ice-cooled solution of aldehyde **5** (100 mg, 112  $\mu$ mol, 1.0 equiv) in THF (2.30 mL) vinylmagnesium bromide (0.7 M in THF; 320  $\mu$ L, 225  $\mu$ mol, 2.0 equiv) was added dropwise and the solution was stirred at 0 °C. After 135 min the reaction was quenched with saturated aqueous  $NH_4Cl$  (5 mL) and diluted with  $Et_2O$  (5 mL). The phases were separated and the aqueous layer was extracted with  $Et_2O$  ( $2 \times 5$  mL). The combined organic layers were washed with brine (5 mL), dried over  $MgSO_4$  and the solvents were removed under reduced pressure. The crude product was purified by column chromatography (Hex/ $EtOAc$ , 20:1  $\rightarrow$  1:1 v/v) to yield a mixture of diastereomers **8d** with a ratio of 2.6:1 (32.0 mg, 44.7  $\mu$ mol, 37%) as a yellow oil and a mixture of diastereomers **8e** with a ratio of 5.7:1 (18.0 mg, 19.6  $\mu$ mol, 17%) as a yellow oil.

**8d:**

**R<sub>f</sub>:** 0.44 (Hex/ $EtOAc$  = 4:1 v/v).

**IR:** ( $CCl_4$ )  $\nu_{max}$  = 3328, 2929, 2857, 1707, 1665, 1599, 1515, 1389, 1254, 1209, 1140, 1026, 836, 778  $cm^{-1}$ .

**<sup>1</sup>H-NMR:** (400 MHz,  $CDCl_3$ )  $\delta$  (ppm) 11.94 (s, 1H,  $NHCOO$ ), 11.86 (s, 1H,  $NH^*COO$ ), 9.58 (s, 2H,  $NH$ ,  $NH^*$ ), 9.07 (s, 1H,  $CHO^*$ ), 9.03 (s, 1H,  $CHO$ ), 6.23 (dd,  $J$  = 8.5, 5.8 Hz, 1H, **H-1'**), 6.09 (dd,  $J$  = 8.3, 5.6 Hz, 1H, **H-1'**), 6.04-5.91 (m, 1H,  $CH-CH=CH_2$ ), 5.85-5.76 (m, 1H,  $CH-CH^*=CH_2$ ), 5.16-5.12 (m, 2H,  $CH-CH=CH_2$ ,  $CH-CH=CH_2^*$ ), 5.12-5.05 (m, 2H,  $CH-CH=CH_2$ ,  $CH-CH=CH_2^*$ ), 5.04-5.02 (m, 1H, **H-6'**), 4.90-4.89 (m, 1H, **H-6**), 4.37-4.30 (m, 2H, **H-3'**, **H-3'**), 3.86-3.84 (m, 1H, **H-4'**), 3.78-3.75 (m, 1H, **H-4'**), 3.73-3.72 (m, 2H, **H-5'**), 3.70-3.68 (m, 2H, **H-5'**), 2.19-2.10 (m, 2H, **H-2'**, **H-2'**), 2.03-1.99 (m, 1H, **H-2'**), 1.99-1.87 (m, 13H, **H-2'**,  $C(CH_3)_2$ ,  $C(CH_3)_2^*$ ), 0.91-0.90 (m, 18H,  $Si-C(CH_3)_3$ ,  $Si-C(CH_3)_3^*$ ), 0.88 (s, 18H,  $Si-C(CH_3)_3$ ,  $Si-C(CH_3)_3^*$ ), 0.08 (s, 6H,  $Si-(CH_3)_2^*$ ), 0.07-0.05 (m, 18H,  $Si-(CH_3)_2^*$ ,  $2xSi-(CH_3)_2$ ).

**<sup>13</sup>C-NMR:** (100 MHz,  $CDCl_3$ )  $\delta$  (ppm) 186.9 (186.8) ( $CHO$ ), 151.7 ( $NHCOO$ ), 150.3 (**C-2**), 148.0 (147.8) (**C-4**), 138.2 (137.8) ( $CH=CH_2$ ), 115.3 (114.3) ( $CH=CH_2$ ), 105.1 ( $CCl_3$ ), 93.2 (**C-5**), 91.3 ( $C(CH_3)_2$ ), 86.2 (**C-4'**), 84.6 (**C-1'**), 72.5 (72.1) (**C-3'**), 63.4 (**C-5'**), 52.3 (51.1) (**C-6**), 39.1 (38.7) (**C-2'**), 26.14 (26.10) ( $Si-C(CH_3)_3$ ), 21.7 (21.6) ( $C(CH_3)_2$ ), 18.6

(Si-C(CH<sub>3</sub>)<sub>3</sub>), 18.2 (18.1) (Si-C(CH<sub>3</sub>)<sub>3</sub>), -4.5 (Si-CH<sub>3</sub>), -4.6 (Si-CH<sub>3</sub>), -5.1 (Si-CH<sub>3</sub>), -5.2 (Si-CH<sub>3</sub>).

**HR-MS:** (ESI positive, CHCl<sub>3</sub>/MeOH), [M+Na]<sup>+</sup> calcd for C<sub>29</sub>H<sub>50</sub>Cl<sub>3</sub>N<sub>3</sub>O<sub>7</sub>Si<sub>2</sub>Na: 736.21451, found: 736.21428.

**8e:**

**R<sub>f</sub>:** 0.34 (Hex/EtOAc = 3:1 v/v).

**IR:** (CCl<sub>4</sub>) ν<sub>max</sub> = 2929, 2857, 1816, 1654, 1463, 1389, 1257, 1138, 837, 789 cm<sup>-1</sup>.

**<sup>1</sup>H-NMR:** (400 MHz, CDCl<sub>3</sub>) δ (ppm) 9.61 (s, 1H, CHO), 9.59 (s, 1H, CHO\*), 6.08-5.96 (m, 2H, H-1', H-1'\*), 5.87-5.74 (m, 2H, CH=CH<sub>2</sub>, CH\*=CH<sub>2</sub>), 5.26-5.15 (m, 2H, CH=CH<sub>2</sub>, CH=CH<sub>2</sub>\*), 5.13-5.02 (m, 4H, CH=CH<sub>2</sub>, CH-CH=CH<sub>2</sub>, CH=CH<sub>2</sub>\*, CH\*-CH=CH<sub>2</sub>), 4.42-4.23 (m, 2H, H-3', H-3'\*), 3.86-3.74 (m, 2H, H-4', H-4'\*), 3.74-3.60 (m, 2H, H-5', H-5'\*), 3.54-3.50 (m, 2H, H-5', H-5'\*), 2.15-2.08 (m, 2H, H-2', H-2'\*), 2.03-1.85 (m, 26H, H-2', H-2'\*, 2xC(CH<sub>3</sub>)<sub>2</sub>, 2xC(CH<sub>3</sub>)<sub>2</sub>\*), 0.91-0.89 (m, 36H, 2xSi-C(CH<sub>3</sub>)<sub>3</sub>, 2xSi-C(CH<sub>3</sub>)<sub>3</sub>\*), 0.11-0.06 (m, 24H, 2xSi-(CH<sub>3</sub>)<sub>2</sub>, 2xSi-(CH<sub>3</sub>)<sub>2</sub>\*).

**<sup>13</sup>C-NMR:** (100 MHz, CDCl<sub>3</sub>) δ (ppm) 183.9 (CHO), 153.5 (C-2), 149.7 (NCOO) 142.8 (C-4), 135.6 (CH=CH<sub>2</sub>), 116.4 (CH=CH<sub>2</sub>), 111.9 (C-5), 104.9 (CCl<sub>3</sub>), 92.5 (C(CH<sub>3</sub>)<sub>2</sub>), 86.9 (C-4'), 85.4 (C-1'), 72.5 (72.3)(C-3'), 63.5 (C-5'), 50.9 (C-6), 38.0 (C-2'), 26.2 (26.1) (Si-C(CH<sub>3</sub>)<sub>3</sub>), 25.97 (25.90) (Si-C(CH<sub>3</sub>)<sub>3</sub>), 21.5 (21.4) (C(CH<sub>3</sub>)<sub>2</sub>), 18.6 (18.2), -4.5 (-4.6), -5.2.

**HR-MS:** (ESI positive, CHCl<sub>3</sub>/MeOH), [M+Na]<sup>+</sup> calcd for C<sub>34</sub>H<sub>55</sub>Cl<sub>6</sub>N<sub>3</sub>O<sub>9</sub>Si<sub>2</sub>Na: 938,15002, found: 938,15004.

### 3',5'-Di(*tert*-butyldimethylsilyl)-3,6-dihydro-5-formyl-6-methyl-2'-deoxycytidine (**9a**)

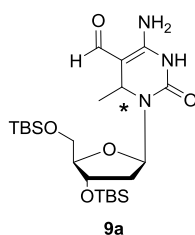

10% Cd–Pb couple (80.0 mg, 711 μmol cadmium, 5.0 equiv) was added in one portion to a vigorously stirred mixture of diastereomers **8a** (100 mg, 142 μmol, 1.0 equiv) in THF (2.20 mL) and aqueous NH<sub>4</sub>OAc (1.0 M, 2.20 mL). After stirring for three and a half hours another portion of 10% Cd–Pb (80.0 mg, 712 μmol, 5.0 equiv) was added. The reaction mixture was stirred at room temperature overnight, and then the solids were filtered and rinsed with H<sub>2</sub>O and DCM. The phases were separated and the aqueous layer was extracted with DCM (2 × 5 mL). The combined organic layers were washed with brine (5 mL), dried over MgSO<sub>4</sub> and the solvents were removed under reduced pressure. The crude product was purified by column chromatography (DCM/MeOH, 60:1 → 15:1 v/v) to yield a mixture of diastereomers **9a** with a ratio of 2.4:1 (28.5 mg, 56.0 μmol, 40%) as a pale yellow waxy solid.

**R<sub>f</sub>**: 0.32 (DCM/MeOH = 15:1 v/v).

**IR**: (CCl<sub>4</sub>)  $\nu_{\max}$  = 2929, 2857, 1698, 1655, 1541, 1382, 1338, 1255, 1081, 835, 777, 667 cm<sup>-1</sup>.

**<sup>1</sup>H-NMR**: (300 MHz, CDCl<sub>3</sub>)  $\delta$  (ppm) 9.64 (s, 1H, NH), 9.55 (s, 1H, NH\*), 8.91 (s, 2H, CHO, CHO\*), 6.20-6.13 (m, 1H, H-1'), 6.13-6.07 (m, 1H, H-1'\*), 4.55 (q, *J* = 6.4 Hz, 1H, H-6\*), 4.40-4.33 (m, 3H, H-6, H-3', H-3'\*), 3.83-3.79 (m, 2H, H-4', H-4'\*), 3.73-3.65 (m, 4H, H-5', H-5'\*), 2.22-2.02 (m, 2H, H-2', H-2'\*), 1.97-1.84 (m, 2H, H-2', H-2'\*), 1.34 (d, *J* = 6.4 Hz, 3H, CH-CH<sub>3</sub>), 1.29-1.23 (m, 3H, CH-CH<sub>3</sub>\*), 0.91 (s, 18H, Si-C(CH<sub>3</sub>)<sub>3</sub>, Si-C(CH<sub>3</sub>)<sub>3</sub>\*), 0.89-0.88 (m, 18H, Si-C(CH<sub>3</sub>)<sub>3</sub>, Si-C(CH<sub>3</sub>)<sub>3</sub>\*), 0.08 (s, 12H, Si-(CH<sub>3</sub>)<sub>2</sub>, Si-(CH<sub>3</sub>)<sub>2</sub>\*), 0.07 (s, 12H, Si-(CH<sub>3</sub>)<sub>2</sub>, Si-(CH<sub>3</sub>)<sub>2</sub>\*).

**<sup>13</sup>C-NMR**: (100 MHz, CDCl<sub>3</sub>)  $\delta$  (ppm) 182.9 (182.7) (CHO), 153.6 (153.5), 153.3, 92.8 (C-5), 86.8 (86.3) (C-4'), 84.9 (84.7) (C-1'), 72.8 (72.3) (C-3'), 63.6 (63.3) (C-5'), 47.2 (46.5) (C-6), 38.5 (38.1) (C-2'), 26.1 (Si-C(CH<sub>3</sub>)<sub>3</sub>), 25.93 (25.90) (Si-C(CH<sub>3</sub>)<sub>3</sub>), 25.7 (25.3) (CH-CH<sub>3</sub>), 18.5 (Si-C(CH<sub>3</sub>)<sub>3</sub>), 18.2 (18.1) (Si-C(CH<sub>3</sub>)<sub>3</sub>), -4.5 (Si-CH<sub>3</sub>), -4.59 (-4.62) (Si-CH<sub>3</sub>), -5.2 (Si-CH<sub>3</sub>), -5.3 (-5.4) (Si-CH<sub>3</sub>).

**HR-MS**: (ESI positive, CHCl<sub>3</sub>/MeOH), [M+H]<sup>+</sup> calcd for C<sub>23</sub>H<sub>46</sub>N<sub>3</sub>O<sub>5</sub>Si<sub>2</sub>: 500.29705, found: 500.29709, [M+Na]<sup>+</sup> calcd for C<sub>23</sub>H<sub>45</sub>N<sub>3</sub>O<sub>5</sub>Si<sub>2</sub>Na: 522.27900, found: 522.27887.

**3',5'-Di(*tert*-butyldimethylsilyl)-3,6-dihydro-5-formyl-6-(trimethylsilylethynyl)-2'-deoxyctidine (9b)**

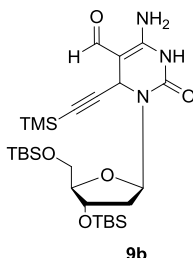

10% Cd–Pb couple (44.0 mg, 391  $\mu$ mol cadmium, 2.9 equiv) was added in one portion to a vigorously stirred solution of diastereomer **8b** (106 mg, 134  $\mu$ mol, 1.0 equiv) in THF (2.00 mL) and aqueous NH<sub>4</sub>OAc (1.0 M, 2.00 mL). After stirring for three and a half hours the solids were filtered and rinsed with H<sub>2</sub>O and DCM. The phases were separated and the aqueous layer was extracted with DCM (2  $\times$  10 mL). The combined organic layers were washed with brine (5 mL), dried over MgSO<sub>4</sub> and the solvents were removed under reduced pressure. The crude product was purified by column chromatography (DCM/MeOH, 60:1  $\rightarrow$  15:1 v/v) to yield diastereomer **9b** (60.6 mg, 104  $\mu$ mol, 77%) as a yellow waxy solid.

**R<sub>f</sub>**: 0.36 (DCM/MeOH = 15:1 v/v).

**IR**: (KBr)  $\nu_{\max}$  = 2929, 2858, 2166, 1706, 1543, 1463, 1362, 1252, 1081, 778, 667, 569 cm<sup>-1</sup>.

**<sup>1</sup>H-NMR**: (400 MHz, CDCl<sub>3</sub>)  $\delta$  (ppm) 9.40 (s, 1H, NH), 8.96 (s, 1H, CHO), 5.95 (dd, *J* = 8.4, 5.6 Hz, 1H, H-1'), 5.04 (s, 1H, H-6), 4.39-4.37 (m, 1H, H-4'), 3.90-3.87 (m, 1H, H-3'), 3.75 (dd, *J* = 10.8, 4.4 Hz, 1H, H-5'), 3.64 (dd, *J* = 10.8, 5.7 Hz, 1H, H-5'), 2.27-2.21 (m, 1H, H-2'), 1.99 (ddd, *J* = 12.9, 5.7, 2.2 Hz, 1H, H-2'), 0.91 (s, 9H, Si-C(CH<sub>3</sub>)<sub>3</sub>), 0.88 (s, 9H, Si-C(CH<sub>3</sub>)<sub>3</sub>), 0.11 (s, 9H, Si-(CH<sub>3</sub>)<sub>3</sub>), 0.09-0.08 (m, 6H, Si-(CH<sub>3</sub>)<sub>2</sub>), 0.07 (s, 6H, Si-(CH<sub>3</sub>)<sub>2</sub>).

**<sup>13</sup>C-NMR:** (100 MHz, CDCl<sub>3</sub>) δ (ppm) 182.9 (CHO), 153.4, 152.8, 104.7 (C≡C-TMS), 89.3 (C≡C-TMS), 87.4 (C-4'), 86.2 (C-1'), 73.0 (C-3'), 64.0 (C-5'), 43.7 (C-6), 38.2 (C-2'), 26.1 (Si-C(CH<sub>3</sub>)<sub>3</sub>), 25.9 (Si-C(CH<sub>3</sub>)<sub>3</sub>), 18.6 (Si-C(CH<sub>3</sub>)<sub>3</sub>), 18.1 (Si-C(CH<sub>3</sub>)<sub>3</sub>), 0.1 (Si-(CH<sub>3</sub>)<sub>3</sub>), -4.6 (Si-CH<sub>3</sub>), -4.6 (Si-CH<sub>3</sub>), -5.1 (Si-CH<sub>3</sub>). C-5 is not observed.

**HR-MS:** (ESI positive, MeOH), [M+Na]<sup>+</sup> calcd for C<sub>27</sub>H<sub>51</sub>N<sub>3</sub>O<sub>5</sub>Si<sub>3</sub>Na: 604.30287, found: 604.30347.

**Optical rotation:**  $[\alpha]_D^{25}$  (deg cm<sup>3</sup> g<sup>-1</sup> dm<sup>-1</sup>) = +18.8 (c = 1, CHCl<sub>3</sub>).

**3',5'-Di(*tert*-butyldimethylsilyl)-3,6-dihydro-5-formyl-6-(2-phenylethynyl)-2'-deoxycytidine (9c)**

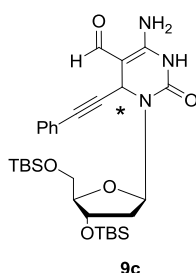

10% Cd–Pb couple (121 mg, 1.08 mmol cadmium, 5.0 equiv) was added in one portion to a vigorously stirred mixture of diastereomers **8c** (170 mg, 215 μmol, 1.0 equiv) in THF (3.00 mL) and aqueous NH<sub>4</sub>OAc (1.0 M, 3.00 mL). After stirring for three hours the solids were filtered and rinsed with H<sub>2</sub>O and DCM. The phases were separated and the aqueous layer was extracted with DCM (2 × 10 mL). The combined organic layers were washed with brine (5 mL), dried over MgSO<sub>4</sub> and the solvents were removed under reduced pressure. The crude product was purified by column chromatography (DCM/MeOH, 60:1 → 15:1 v/v) to yield a mixture of diastereomers **9c** with a ratio of 1:1 (55.0 mg, 93.9 μmol, 44% ) as a yellow oil.

**R<sub>f</sub>:** 0.32 (DCM/MeOH = 15:1 v/v).

**IR:** (CCl<sub>4</sub>) ν<sub>max</sub> = 3308, 2928, 2857, 1700, 1659, 1541, 1362, 1254, 1097, 834, 779, 690 cm<sup>-1</sup>.

**<sup>1</sup>H-NMR:** (300 MHz, CDCl<sub>3</sub>) δ (ppm) 9.64-9.59 (m, 2H, NH, NH\*), 9.04 (bs, 2H, CHO, CHO\*), 7.37-7.35 (m, 4H, CH arom., CH\* arom.), 7.30-7.21 (m, 6H, CH arom., CH\* arom.), 6.23 (dd, *J* = 6.9, 6.9 Hz, 1H, H-1'), 6.17-6.04 (m, 1H, H-1'\*), 5.54 (s, 1H, H-6), 5.30 (s, 1H, H-6\*), 4.45-4.40 (m, 2H), 3.93-3.89 (m, 1H), 3.85-3.77 (m, 3H), 3.75-3.72 (m, 1H), 3.70-3.60 (m, 2H), 2.67-2.58 (m, 1H), 2.31-2.22 (m, 1H), 2.14-1.96 (m, 2H, m, 2H, H-2', H-2'\*), 0.93 (s, 9H, Si-C(CH<sub>3</sub>)<sub>3</sub>), 0.88 (s, 9H, Si-C(CH<sub>3</sub>)<sub>3</sub>\*), 0.87-0.86 (m, 18H, Si-C(CH<sub>3</sub>)<sub>3</sub>, Si-C(CH<sub>3</sub>)<sub>3</sub>\*), 0.12 (s, 6H, Si-(CH<sub>3</sub>)<sub>2</sub>), 0.08 (s, 6H, Si-(CH<sub>3</sub>)<sub>2</sub>\*), 0.04 (s, 6H, Si-(CH<sub>3</sub>)<sub>2</sub>), 0.00 (s, 6H, Si-(CH<sub>3</sub>)<sub>2</sub>\*).

**<sup>13</sup>C-NMR:** (100 MHz, CDCl<sub>3</sub>) δ (ppm) 183.0 (182.7) (CHO), 153.8 (153.6) , 153.3 (152.5), 131.9 (131.8) (C arom.), 128.5 (C arom.), 128.4 (128.3) (C arom.), 128.3 (C arom.), 122.7 (122.6) (C arom.), 89.4 (89.3), 88.8, 87.3, 86.4, 85.7, 84.2, 83.2, 83.0, 72.9 (72.2) (C-3'), 63.9 (63.3) (C-5'), 43.1 (41.0) (C-6'), 38.4 (38.0) (C-2'), 26.2 (26.1) (Si-C(CH<sub>3</sub>)<sub>3</sub>),

25.9 (Si-C(CH<sub>3</sub>)<sub>3</sub>), 18.6 (18.5) (Si-C(CH<sub>3</sub>)<sub>3</sub>), 18.13 (18.10) (Si-C(CH<sub>3</sub>)<sub>3</sub>), -4.5 (-4.56) (Si-CH<sub>3</sub>), -4.57 (-4.67) (Si-CH<sub>3</sub>), -5.12 (-5.23) (Si-CH<sub>3</sub>), -5.31 (-5.32) (Si-CH<sub>3</sub>).

**HR-MS:** (ESI positive, CHCl<sub>3</sub>/MeOH), [M+H]<sup>+</sup> calcd for C<sub>30</sub>H<sub>48</sub>N<sub>3</sub>O<sub>5</sub>Si<sub>2</sub>: 586.31270, found: 586.31308, [M+Na]<sup>+</sup> calcd for C<sub>30</sub>H<sub>47</sub>N<sub>3</sub>O<sub>5</sub>Si<sub>2</sub>Na: 608.29465, found: 608.29493.

### 3',5'-Di(*tert*-butyldimethylsilyl)-3,6-dihydro-5-formyl-6-vinyl-2'-deoxycytidine (**9d**)

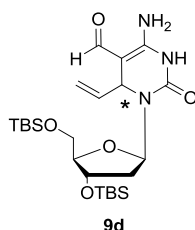

10% Cd–Pb couple (19.7 mg, 175 μmol cadmium, 5.0 equiv) was added in one portion to a vigorously stirred mixture of diastereomers **8d** (25.0 mg, 34.9 μmol, 1.0 equiv) in THF (1.10 mL) and aqueous NH<sub>4</sub>OAc (1.0 M, 1.10 mL). The reaction mixture was stirred at room temperature overnight, and then the solids were filtered and rinsed with H<sub>2</sub>O and DCM. The phases were separated and the aqueous layer was extracted with DCM (2 × 5 mL). The combined organic layers were washed with brine (5 mL), dried over MgSO<sub>4</sub> and the solvents were removed under reduced pressure. The crude product was purified by column chromatography (DCM/MeOH, 30:1 v/v) to yield a mixture of the diastereomers **9d** with a ratio of 2.6:1 (11.0 mg, 21.5 μmol, 61%) as a yellow waxy solid.

**R<sub>f</sub>**: 0.47 (DCM/MeOH = 15:1 v/v).

**IR:** (CCl<sub>4</sub>) ν<sub>max</sub> = 3343, 2928, 2857, 1698, 1655, 1541, 1362, 1255, 1096, 836, 778 cm<sup>-1</sup>.

**<sup>1</sup>H-NMR:** (300 MHz, CDCl<sub>3</sub>) δ (ppm) 9.42 (s, 2H, NH, NH \*), 8.91 (s, 1H, CHO\*), 8.86 (s, 1H, CHO), 6.22 (dd, *J* = 8.7, 5.6 Hz, 1H, H-1\*), 6.12 (dd, *J* = 8.7, 5.6 Hz, 1H, H-1'), 5.98 (ddd, *J* = 17.1, 10.1, 4.7 Hz, 1H, CH-CH=CH<sub>2</sub>), 5.78 (ddd, *J* = 17.0, 10.1, 5.5 Hz, 1H, CH-CH\*=CH<sub>2</sub>), 5.11-4.97 (m, 4H, CH-CH=CH<sub>2</sub>, CH-CH=CH<sub>2</sub>\*), 4.93 (d, *J* = 5.4 Hz, 1H, H-6\*), 4.76 (d, *J* = 4.7 Hz, 1H, H-6), 4.36-4.33 (m, 2H, H-3', H-3'\*), 3.85-3.81 (m, 1H, H-4'), 3.78-3.76 (m, 1H, H-4'\*), 3.72- 3.67 (m, 4H, H-5', H-5'\*), 2.23-2.09 (m, 2H, H-2', H-2'\*), 1.97-1.84 (m, 2H, H-2', H-2'\*), 0.91-0.88 (m, 36H, 2xSi-C(CH<sub>3</sub>)<sub>3</sub>, 2xSi-C(CH<sub>3</sub>)<sub>3</sub>\*), 0.08-0.06 (m, 24H, 2xSi-(CH<sub>3</sub>)<sub>2</sub>, 2xSi-(CH<sub>3</sub>)<sub>2</sub>\*).

**<sup>13</sup>C-NMR:** (75 MHz, CDCl<sub>3</sub>) δ (ppm) 183.4 (CHO), 153.8, 153.2, 139.5 (CH=CH<sub>2</sub>), 114.7 (CH=CH<sub>2</sub>), 87.0 (C-4'), 85.3 (C-1'), 72.4 (C-3'), 63.5 (C-5'), 52.8 (C-6), 38.2 (C-2'), 26.14 (26.11) (Si-C(CH<sub>3</sub>)<sub>3</sub>), 25.92 (25.90) (Si-C(CH<sub>3</sub>)<sub>3</sub>), 18.60 (18.55) (Si-C(CH<sub>3</sub>)<sub>3</sub>), 18.15 (18.13) (Si-C(CH<sub>3</sub>)<sub>3</sub>), -4.5 (Si-CH<sub>3</sub>), -4.6 (Si-CH<sub>3</sub>), -5.2 (Si-CH<sub>3</sub>), -5.3 (Si-CH<sub>3</sub>). C-5 is not observed.

**HR-MS:** (ESI positive, MeOH), [M+H]<sup>+</sup> calcd for C<sub>24</sub>H<sub>46</sub>N<sub>3</sub>O<sub>5</sub>Si<sub>2</sub>: 512.29705, found: 512.29711, [M+Na]<sup>+</sup> calcd for C<sub>24</sub>H<sub>45</sub>N<sub>3</sub>O<sub>5</sub>Si<sub>2</sub>Na: 534.27900, found: 534.27848.

# NMR Spectra:

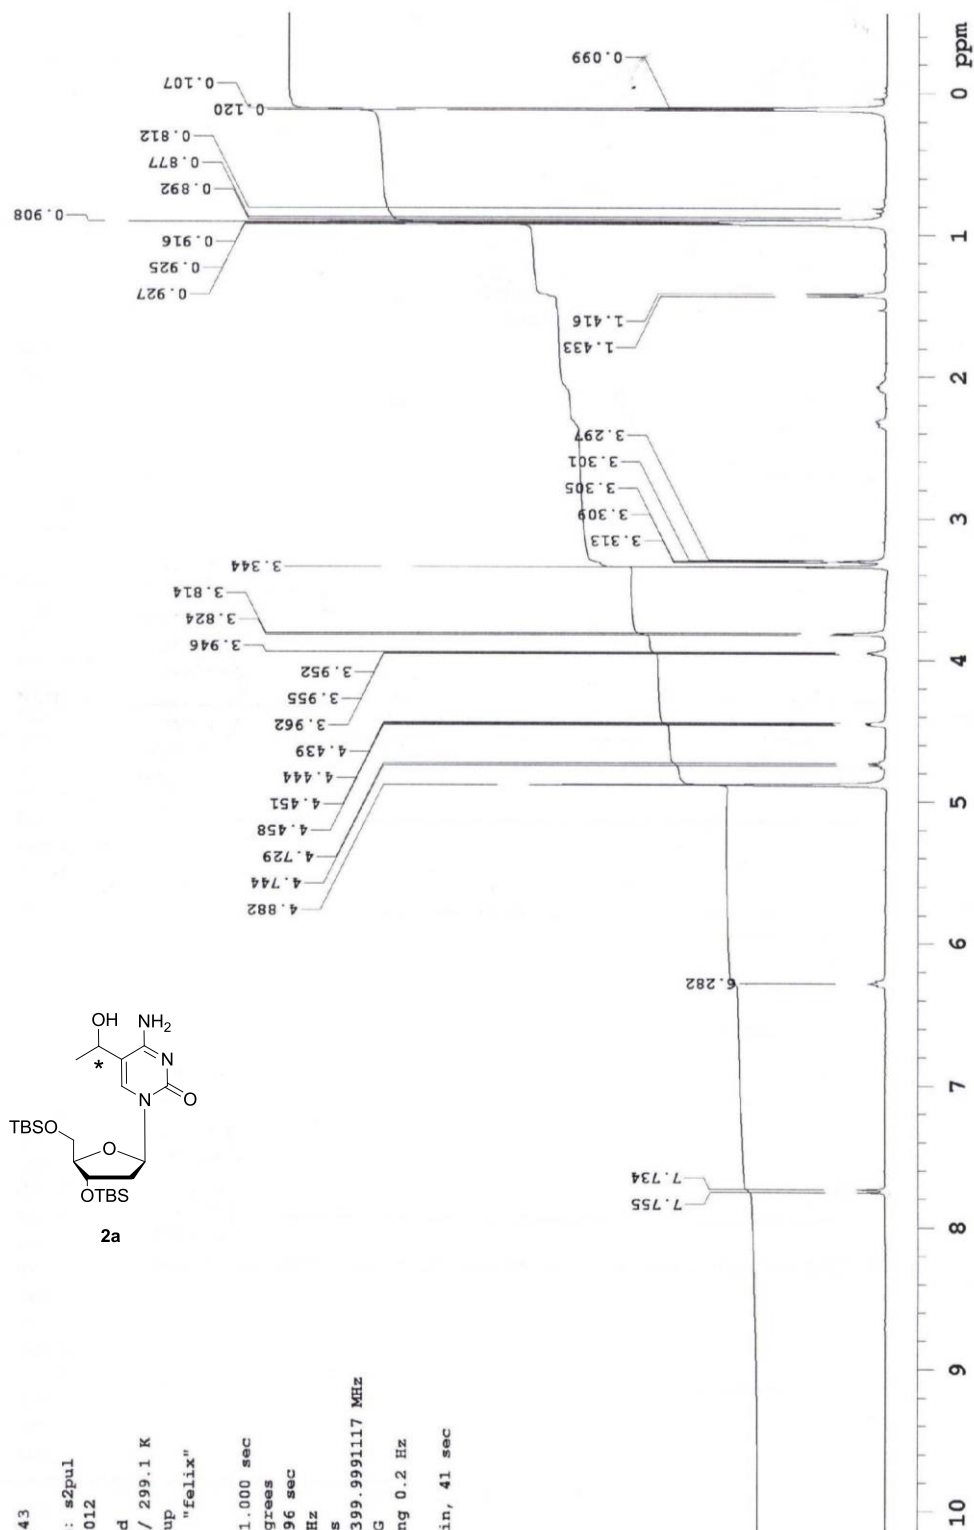

A. Chentsova

Sample: AC 5-443

Pulse Sequence: #2pul

Date: Nov 20 2012

Solvent: cd3od

Temp. 26.0 C / 299.1 K

Operator: walkup

Mercury-400EB "felix"

Relax. delay 1.000 sec

Pulse 29.7 degrees

Acq. time 1.996 sec

Width 6398.0 Hz

32 repetitions

OBSERVE H1, 399.999117 MHz

DATA PROCESSING

Line broadening 0.2 Hz

FT size 32768

Total time 3 min, 41 sec

Sample: AC 5-443

Pulse Sequence: APT

Date: Nov 20 2012

Solvent: cd3od

Temp. 26.0 C / 299.1 K

Operator: walkup

Mercury-400BB  
"felix"

Relax. delay 1.000 sec

1st pulse 90.0 degrees

2nd pulse 135.0 degrees

Acq. time 1.000 sec

Width 24154.6 Hz

1024 repetitions

OBSERVE C13, 100.5797244 MHZ

DECOUPLE H1, 400.0010689 MHz

Power 38 dB

on during acquisition

WALTZ-16 modulated

## DATA PROCESSING

Line broadening due to H<sub>2</sub>

FT size 65536

Total time 1 hr, 15 min, 20 sec

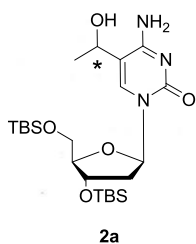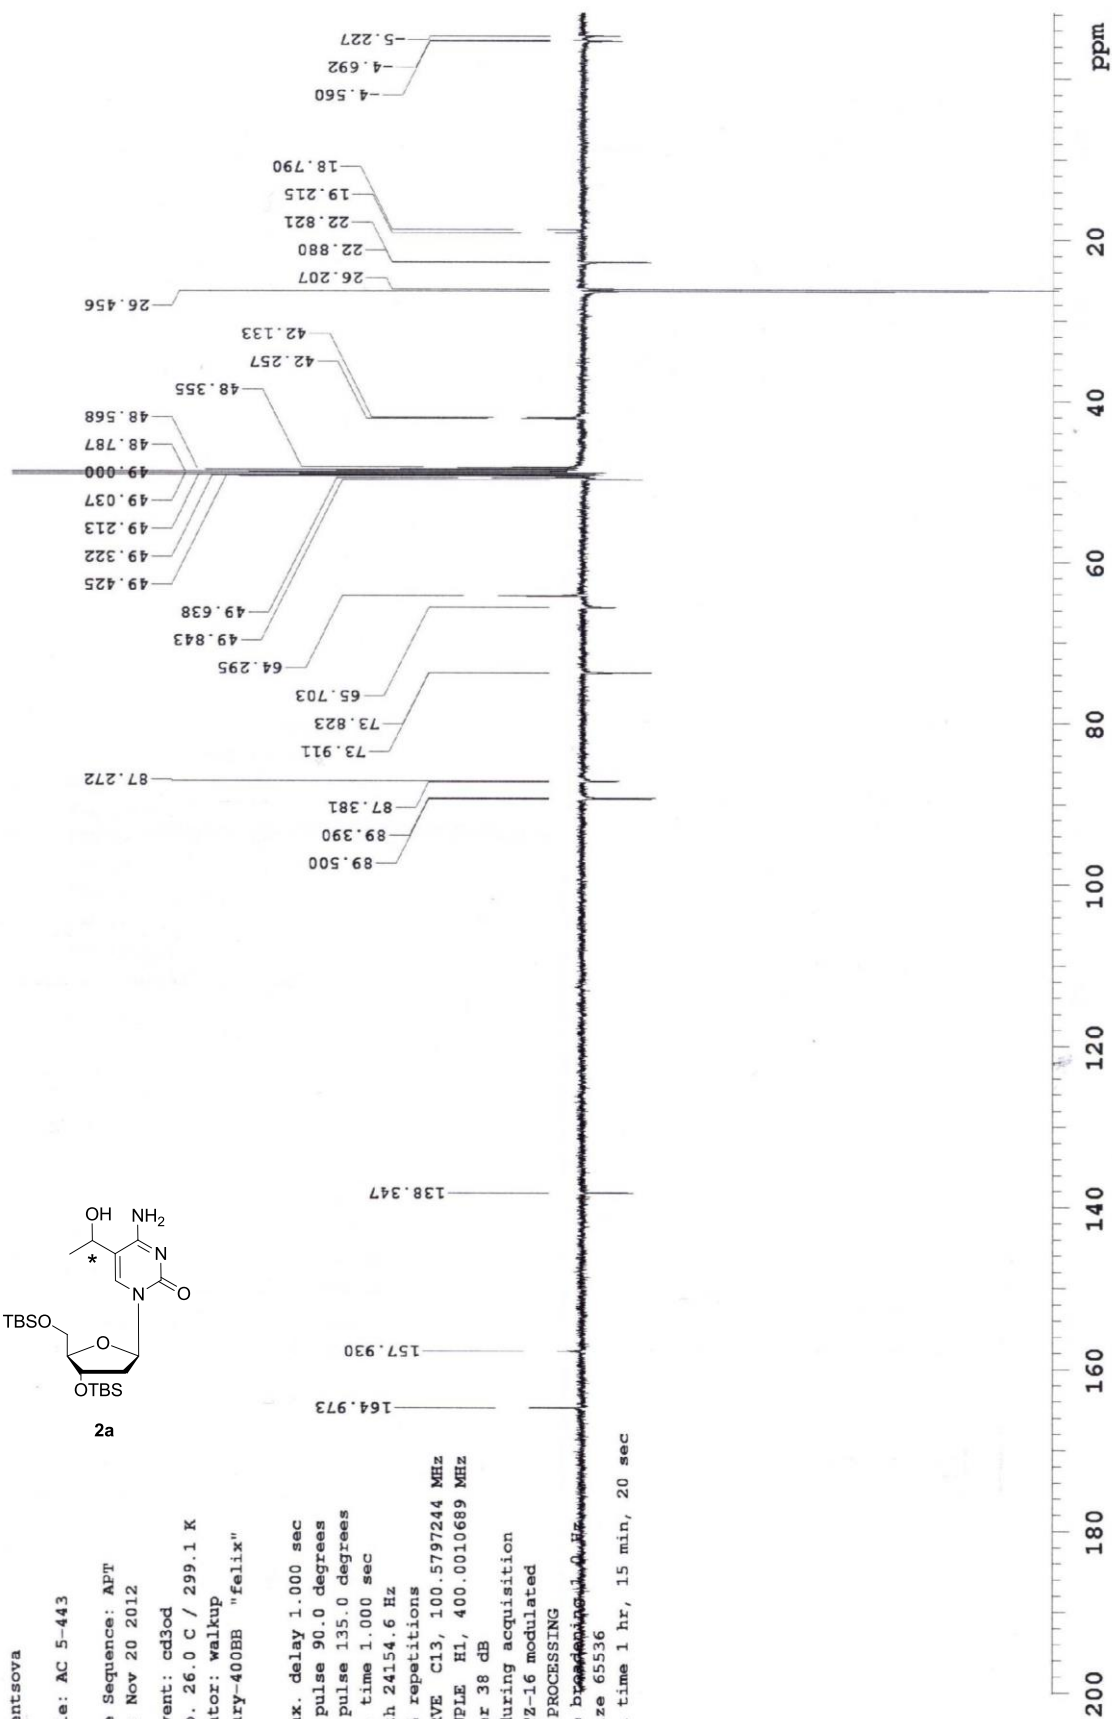



A. Chentsova

Sample: AC5-471

Pulse Sequence: s2pul

Solvent: cd3od

Temp. 26.0 C / 299.1 K

Operator: vnmr1

Mercury-300BB "jutta"

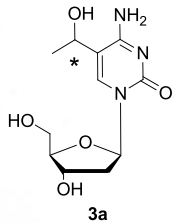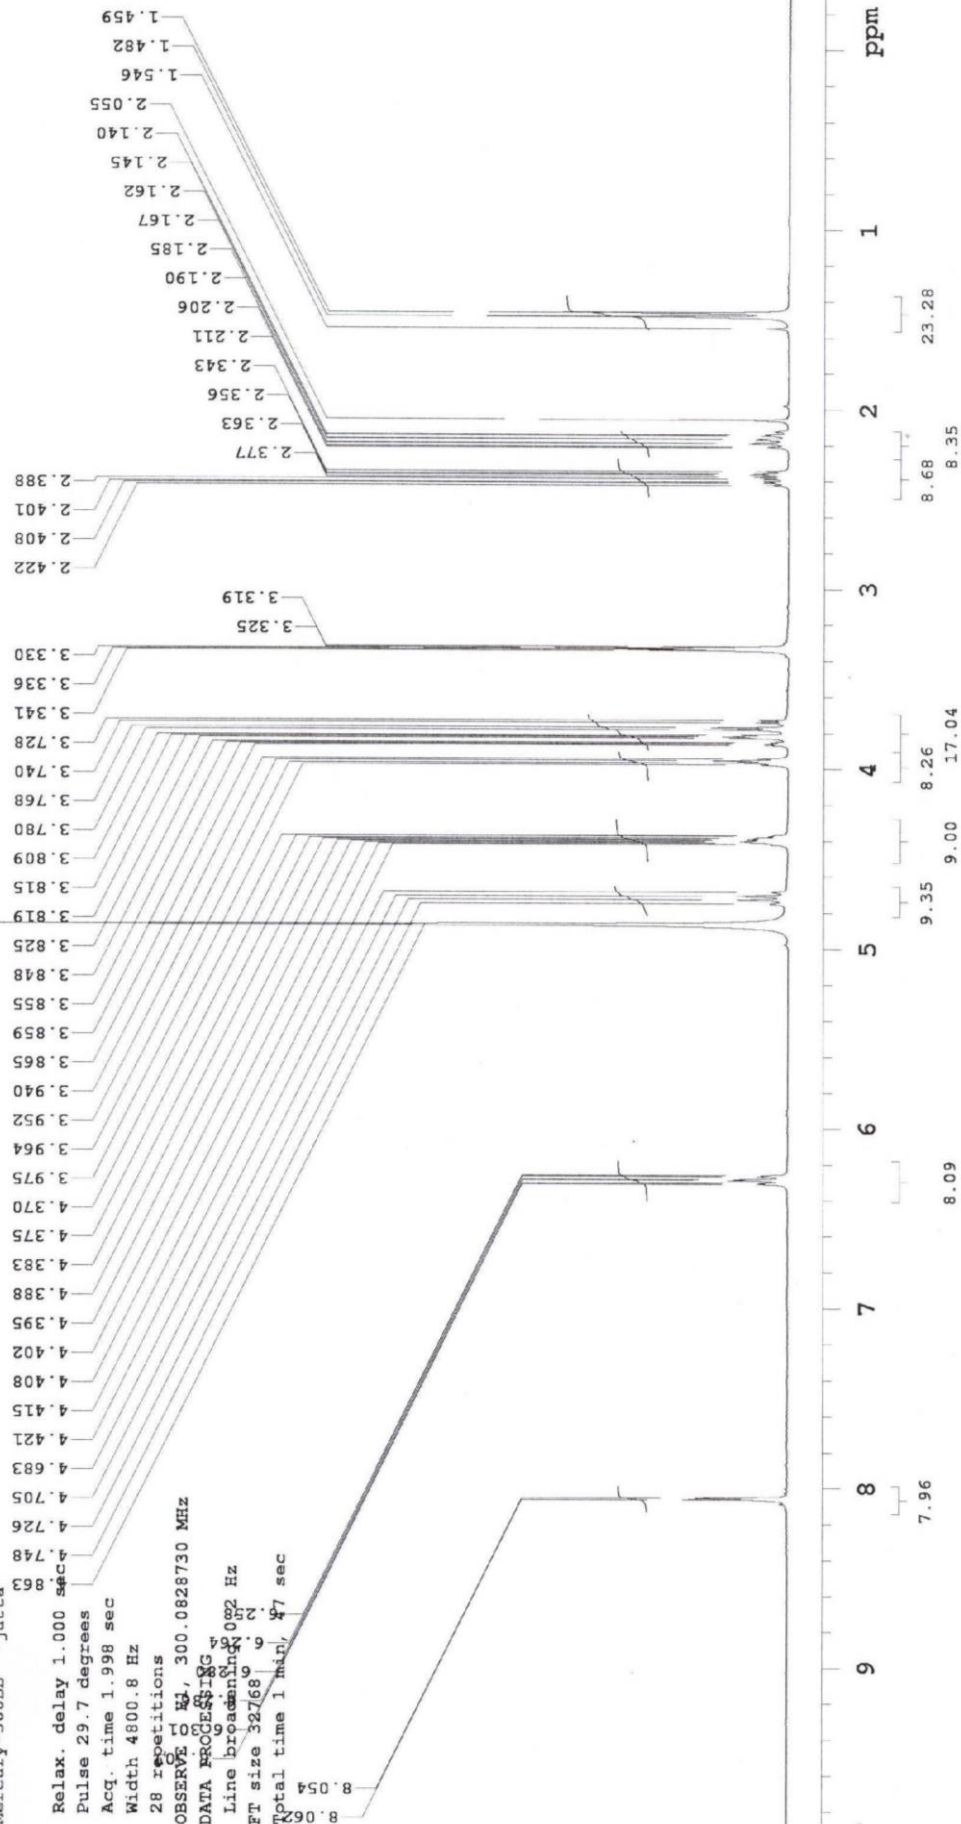

Relax. delay 1.000 sec  
Pulse 29.7 degrees  
Acq. time 1.998 sec  
Width 4800.8 Hz  
28 repetitions  
OBSERVE F2, 300.0828730 MHz  
DATA PROCESSING  
Line broadening 0.002 Hz  
FT size 32768  
Total time 1 min, 27 sec

A. Chentsova

Sample: AC 5-471

Pulse Sequence: APT

Date: Dec 3 2012

Solvent: cd3od

Temp. 26.0 C / 299.1 K

Operator: walkup

Mercury-400BB "felix"

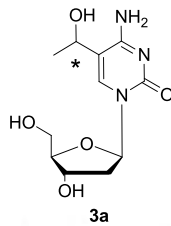

Relax. delay 1.000 sec  
1st pulse 90.0 degrees  
2nd pulse 135.0 degrees  
Acq. time 1.000 sec  
Width 24154.6 Hz  
5000 repetitions  
OBSERVE C13, 100.5797134 MHz  
DECOUPLE H1, 400.0010689 MHz  
Power 38 dB  
on during acquisition  
WALTZ-16 modulated

DATA PROCESSING

time broadening 1.0 Hz

FT size 65536

Total time 3 hr, 7 min, 20 sec

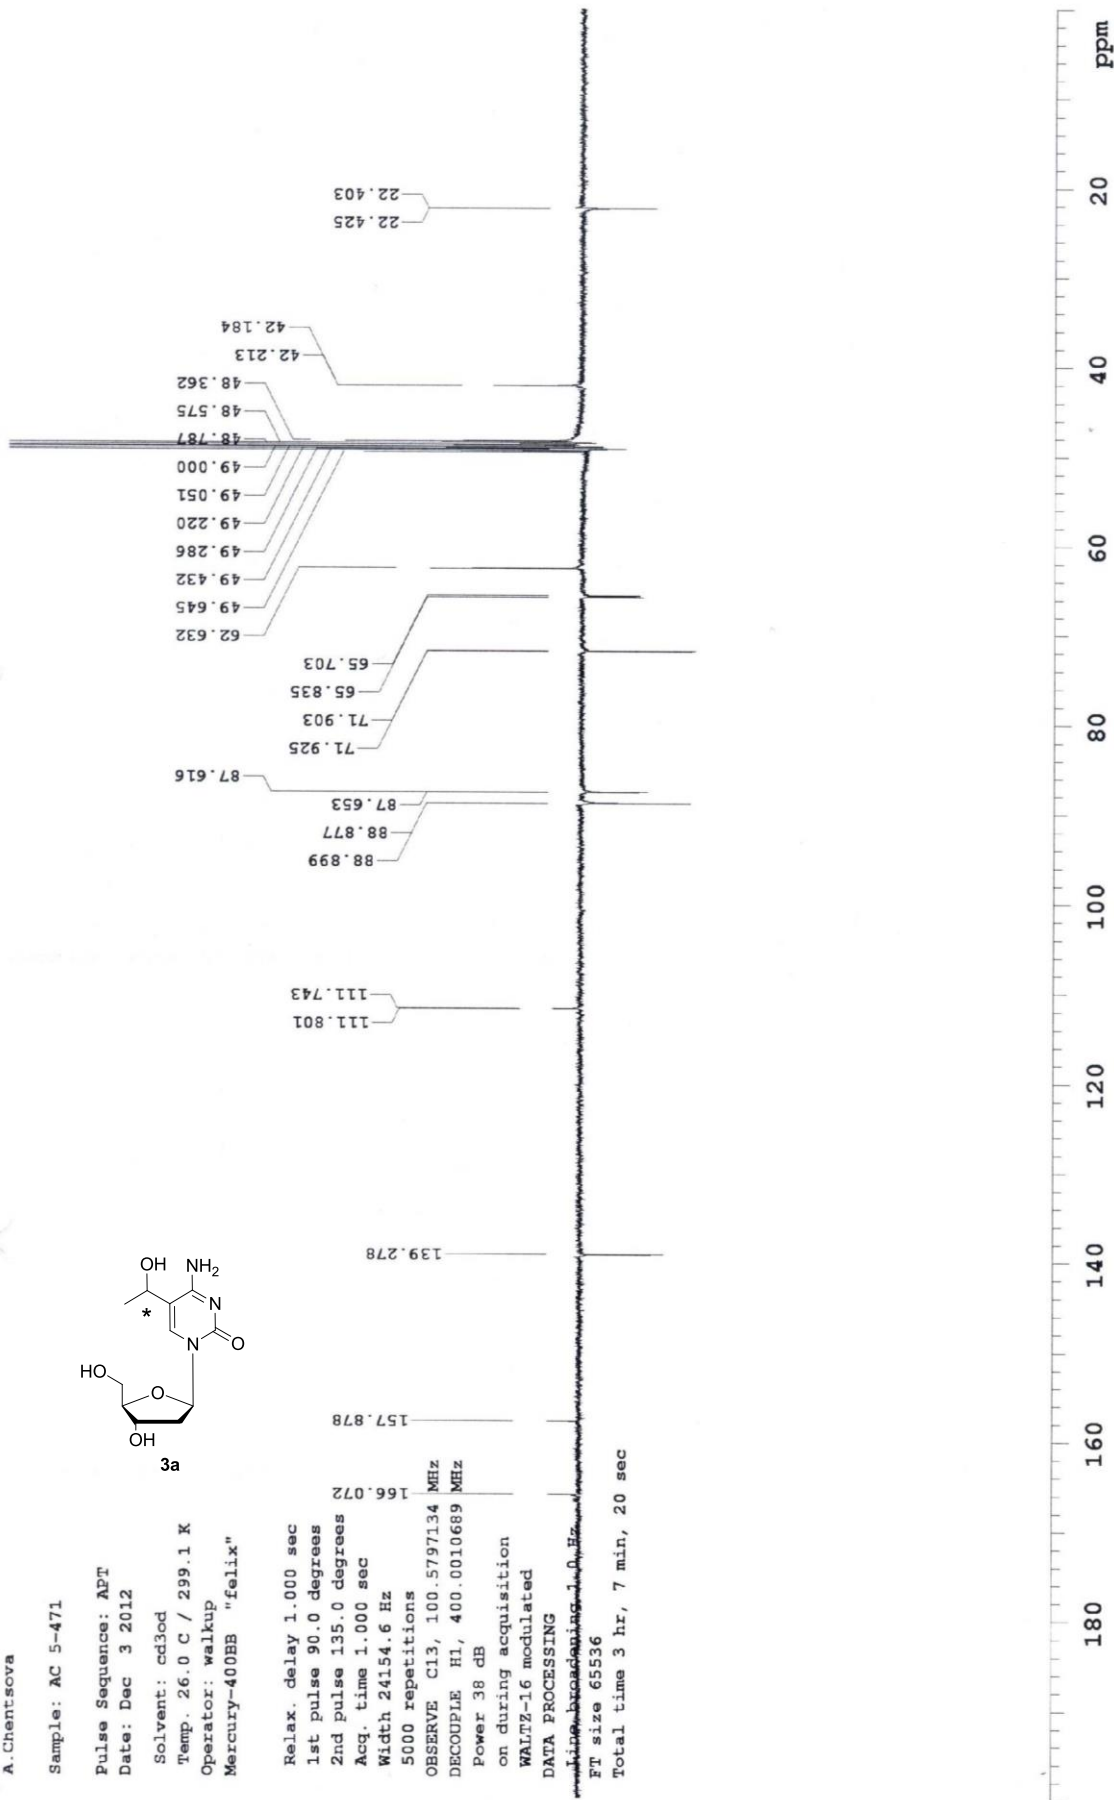

A. Chentsova

Sample: AC5-28AM

Pulse Sequence: s2pul

Solvent: cd3od

Temp. 26.0 C / 299.1 K

Operator: vnmr1

Mercury-300BB "jutta"

Relax. delay 1.000 sec

Pulse 29.7 degrees

Acq. time 1.998 sec

Width 4800.8 Hz

28 repetitions

OBSERVE H1, 300.0826807 MHz

DATA PROCESSING

Line broadening 0.2 Hz

FT size 32768

Total time 3 min, 35 sec

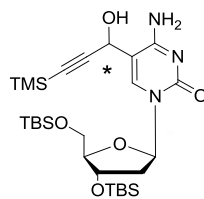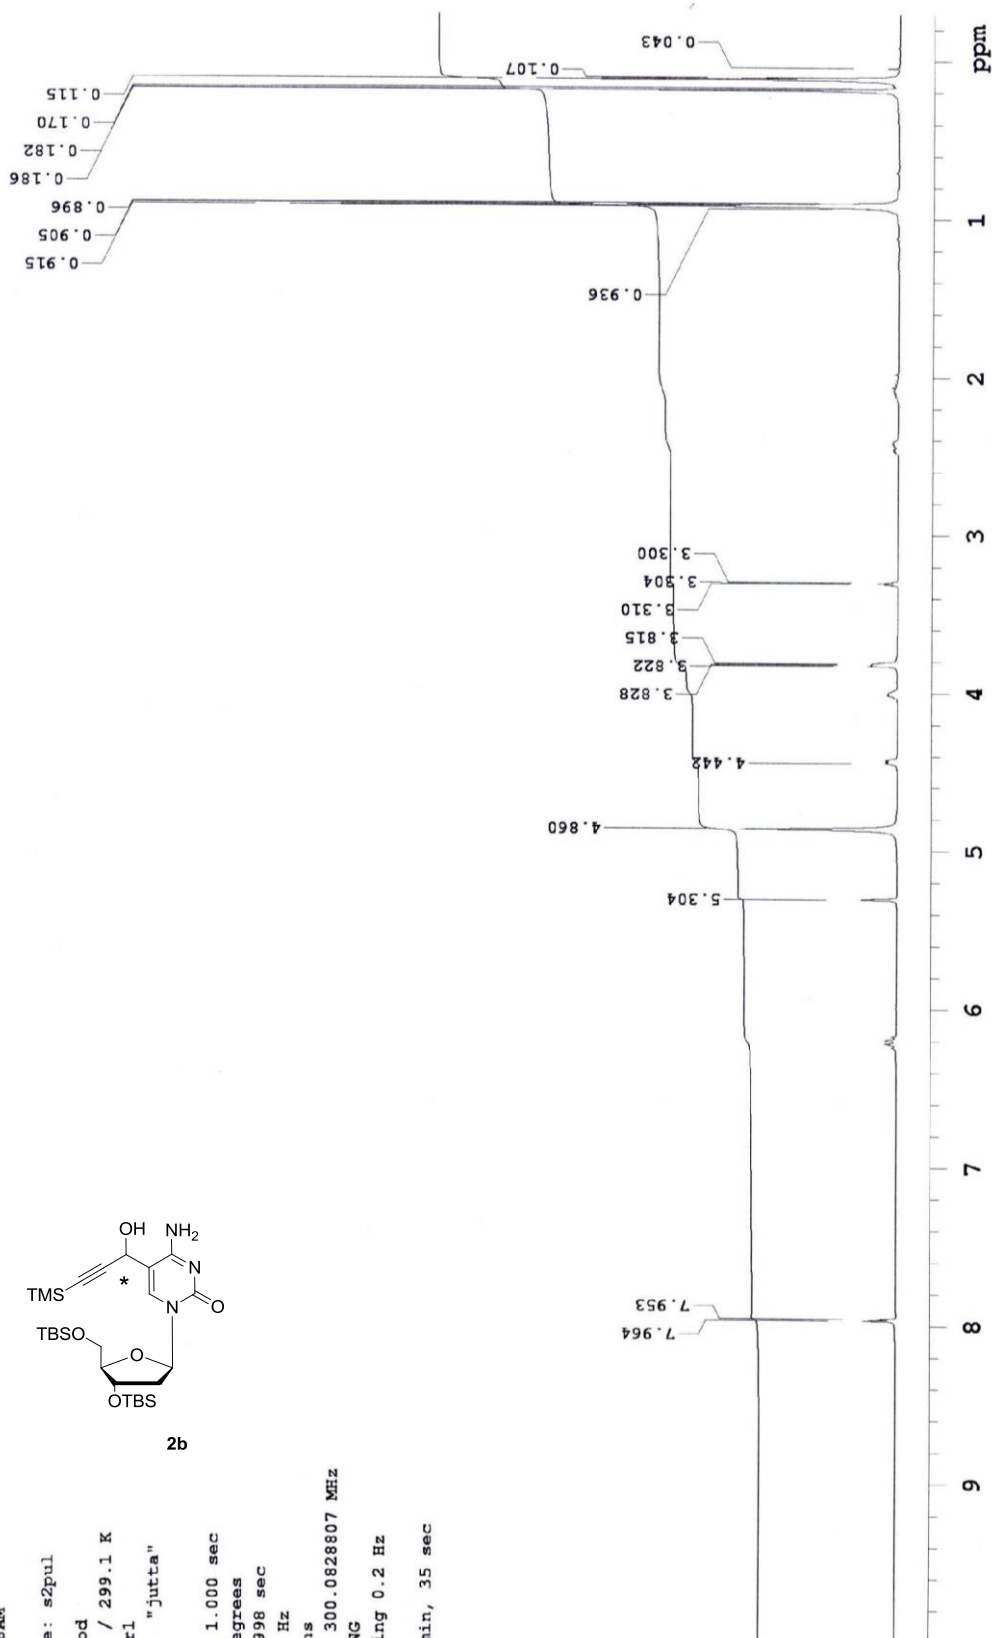

E. Kapeurani

Sample: EK-24C

Pulse Sequence: s2pul

Date: Aug 28 2012

Solvent: cdcl3

Temp. 26.0 C / 299.1 K

Operator: walkup

Mercury-400BB "felix"

Relax. delay 1.000 sec

Pulse 45.0 degrees

Acq. time 1.300 sec

Width 24154.6 Hz

2000 repetitions

OBSERVE C13, 100.5794365 MHz

DECOUPLE H1, 399.9994929 MHz

Power 38 dB

continuously on

WALTZ-16 modulated

DATA PROCESSING

Line broadening 1.0 Hz

FT size 65536

Total time 1 hr, 21 min, 50 sec

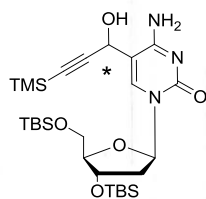

2b

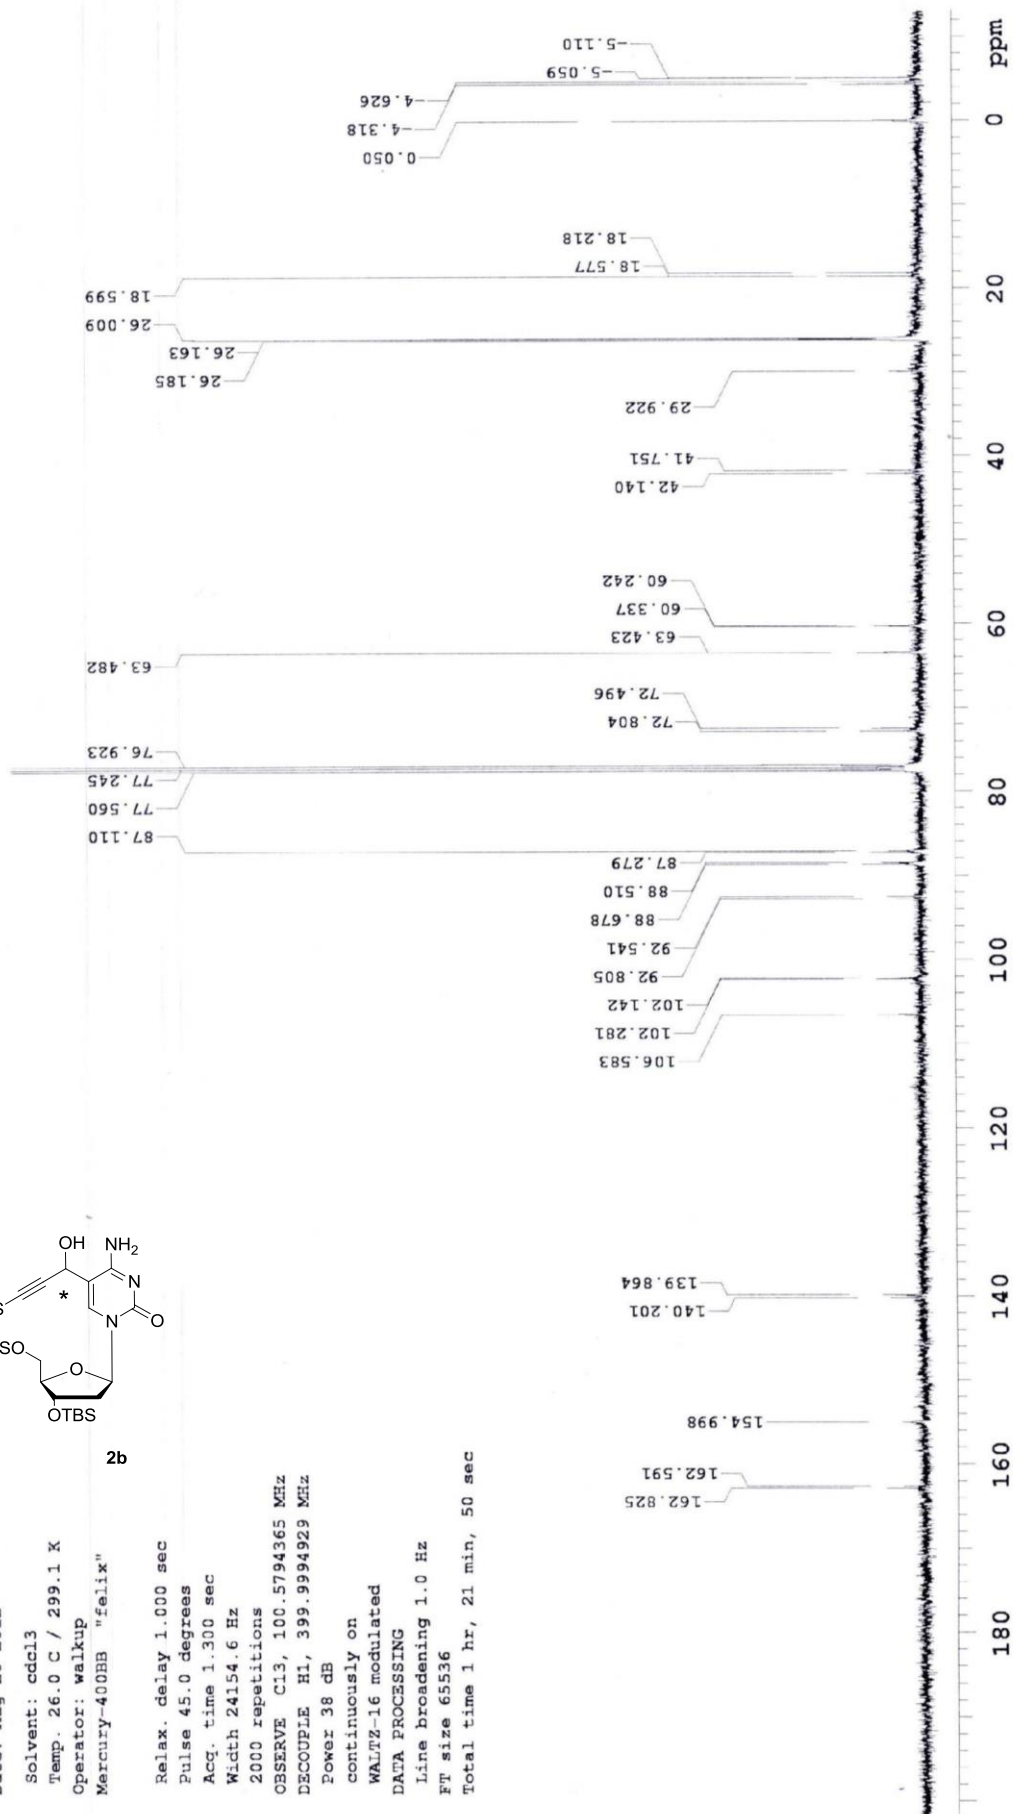

A. Chentsova

Sample: AC5-28BM

Pulse Sequence: s2pul

Solvent: cd3od

Temp. 26.0 C / 299.1 K

Operator: vnmr1

Mercury-300EBB "jutta"

Relax. delay 1.000 sec

Pulse 29.7 degrees

Acq. time 1.998 sec

Width 4800.8 Hz

64 repetitions

OBSERVE H1, 300.0828807 MHz

DATA PROCESSING

Line broadening 0.2 Hz

FT size 32768

Total time 3 min, 35 sec

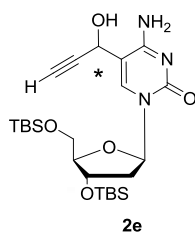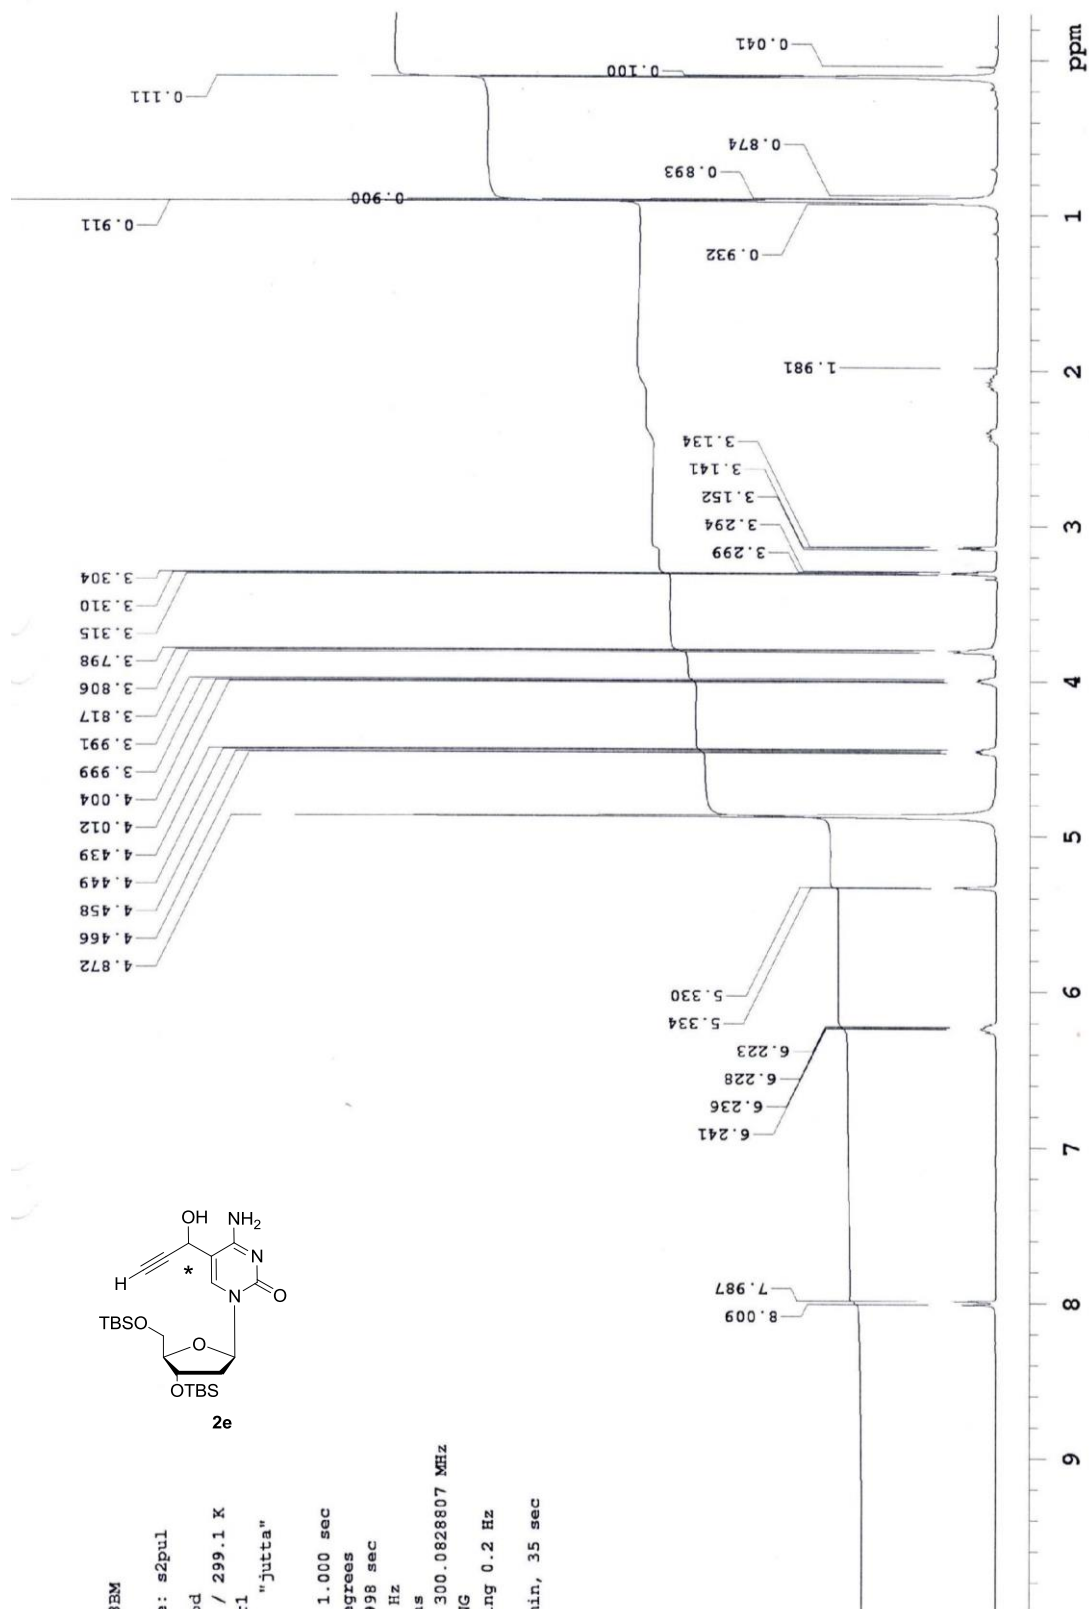

A. Chentsova

Sample: AC5-28BM

Pulse Sequence: APT

Date: Oct 26 2012

Solvent: cd3od

Temp. 26.0 C / 299.1 K

Operator: walkup

Mercury-400BB "felix"

Relax. delay 1.000 sec

1st pulse 90.0 degrees

2nd pulse 135.0 degrees

Acq. time 1.000 sec

Width 24154.6 Hz

848 repetitions

OBSERVE C13, 100.5797274 MHz

DECOUPLE H1, 400.0010689 MHz

Power 38 dB

on during acquisition

WALTZ16 MODIFIED

DATA PROCESSING

Line broadening 1.0 Hz

FT size 65536

Total time 1 hr, 15 min, 20 sec

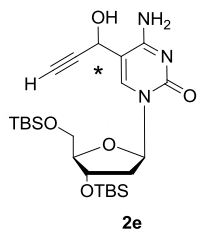

2e

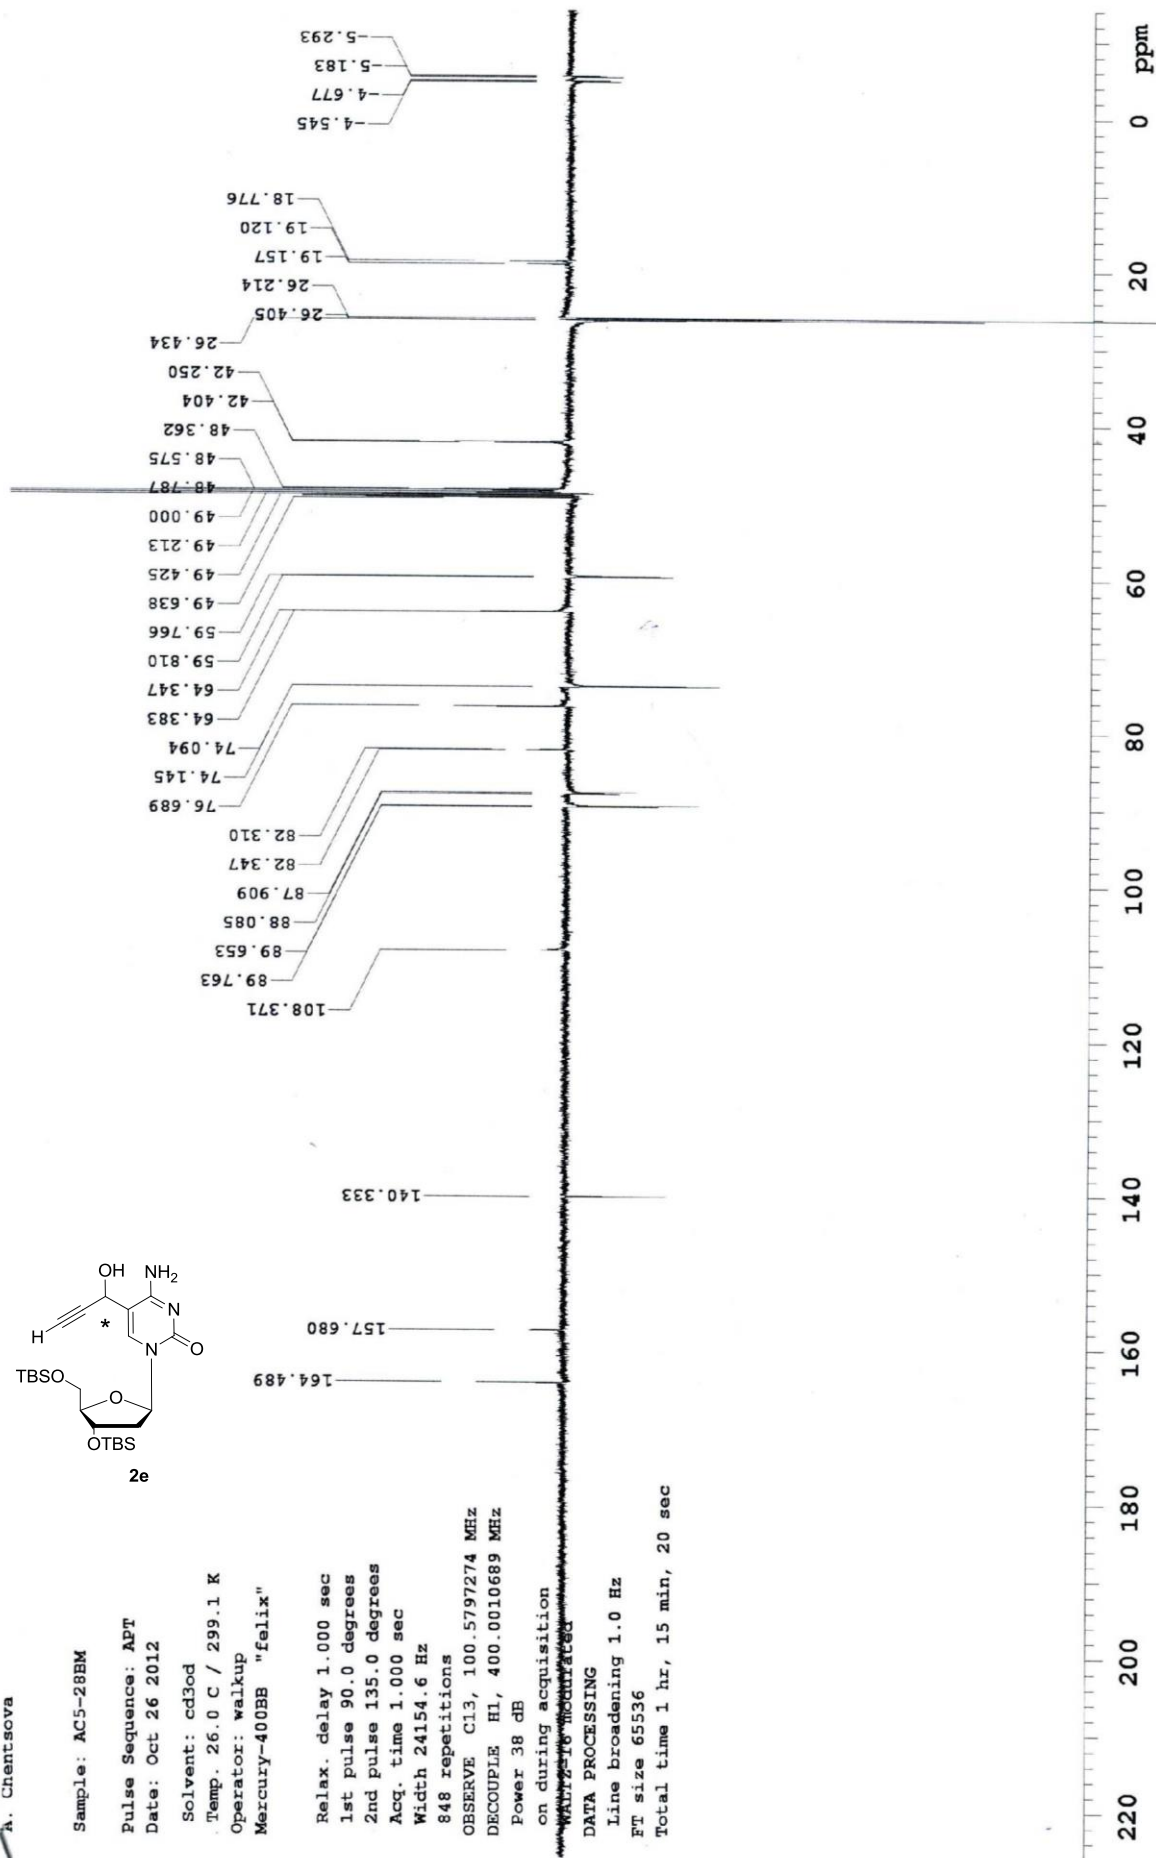



Sample: AC 5-H1

Pulse Sequence: s2pul

Date: Apr 17 2013

Solvent: cd3od

Temp. 26.0 C / 299.1 K

Operator: walkup

Mercury-400DBB "felix"

Relax. delay 1.000 sec

Pulse 29.7 degrees

Acq. time 1.996 sec

Width 7199.4 Hz

32 repetitions

OBSERVE H1, 399.9991423 MHz

DATA PROCESSING

Line broadening 0.2 Hz

FT size 32768

Total time 1 min, 52 sec

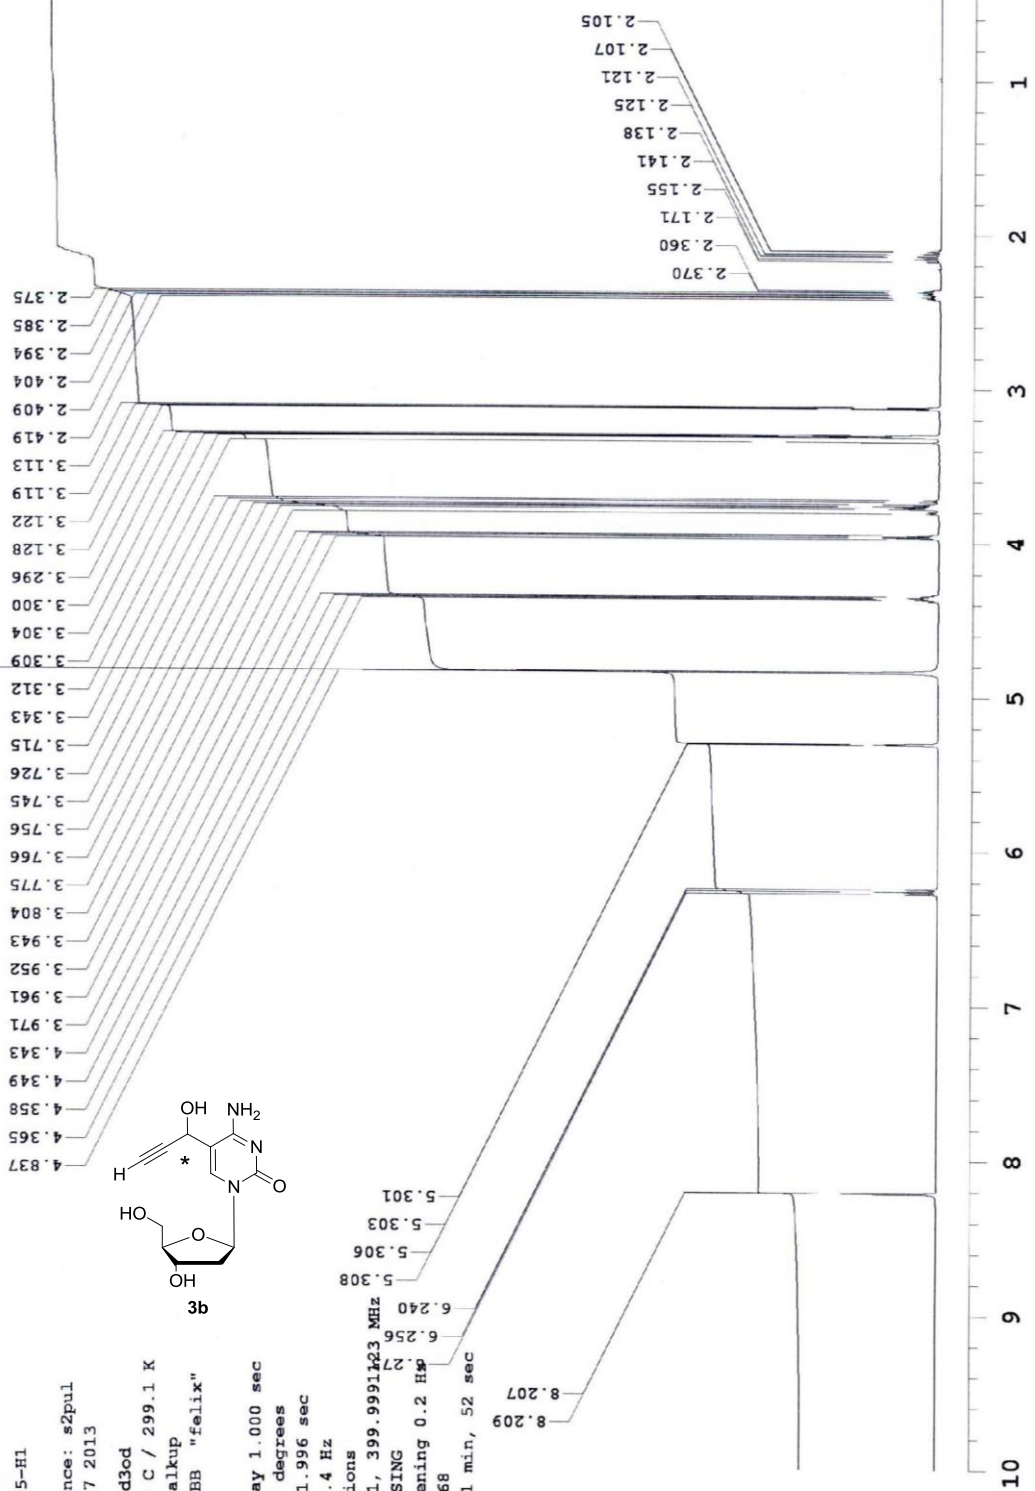

A. Chentsova

Sample: AC5-H1

Pulse Sequence: s2pul

Solvent: cd3od

Temp. 26.0 C / 299.1 K

Operator: vnmr1

Mercury-300BB "Jutta"

Relax. delay 1.000 sec

Pulse 45.0 degrees

Acq. time 1.301 sec

Width 18115.9 Hz

736 repetitions

OBSERVE C13, 75.4557935 MHz

DECOUPLE H1, 300.0843291 MHz

Power 37 dB

continuously on

WALTZ-16 modulated

DATA PROCESSING

Line broadening 0.5 Hz

FT size 65536

Total time 1 hr, 24 min, 1 sec

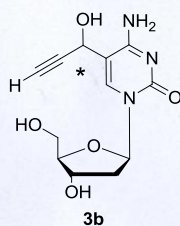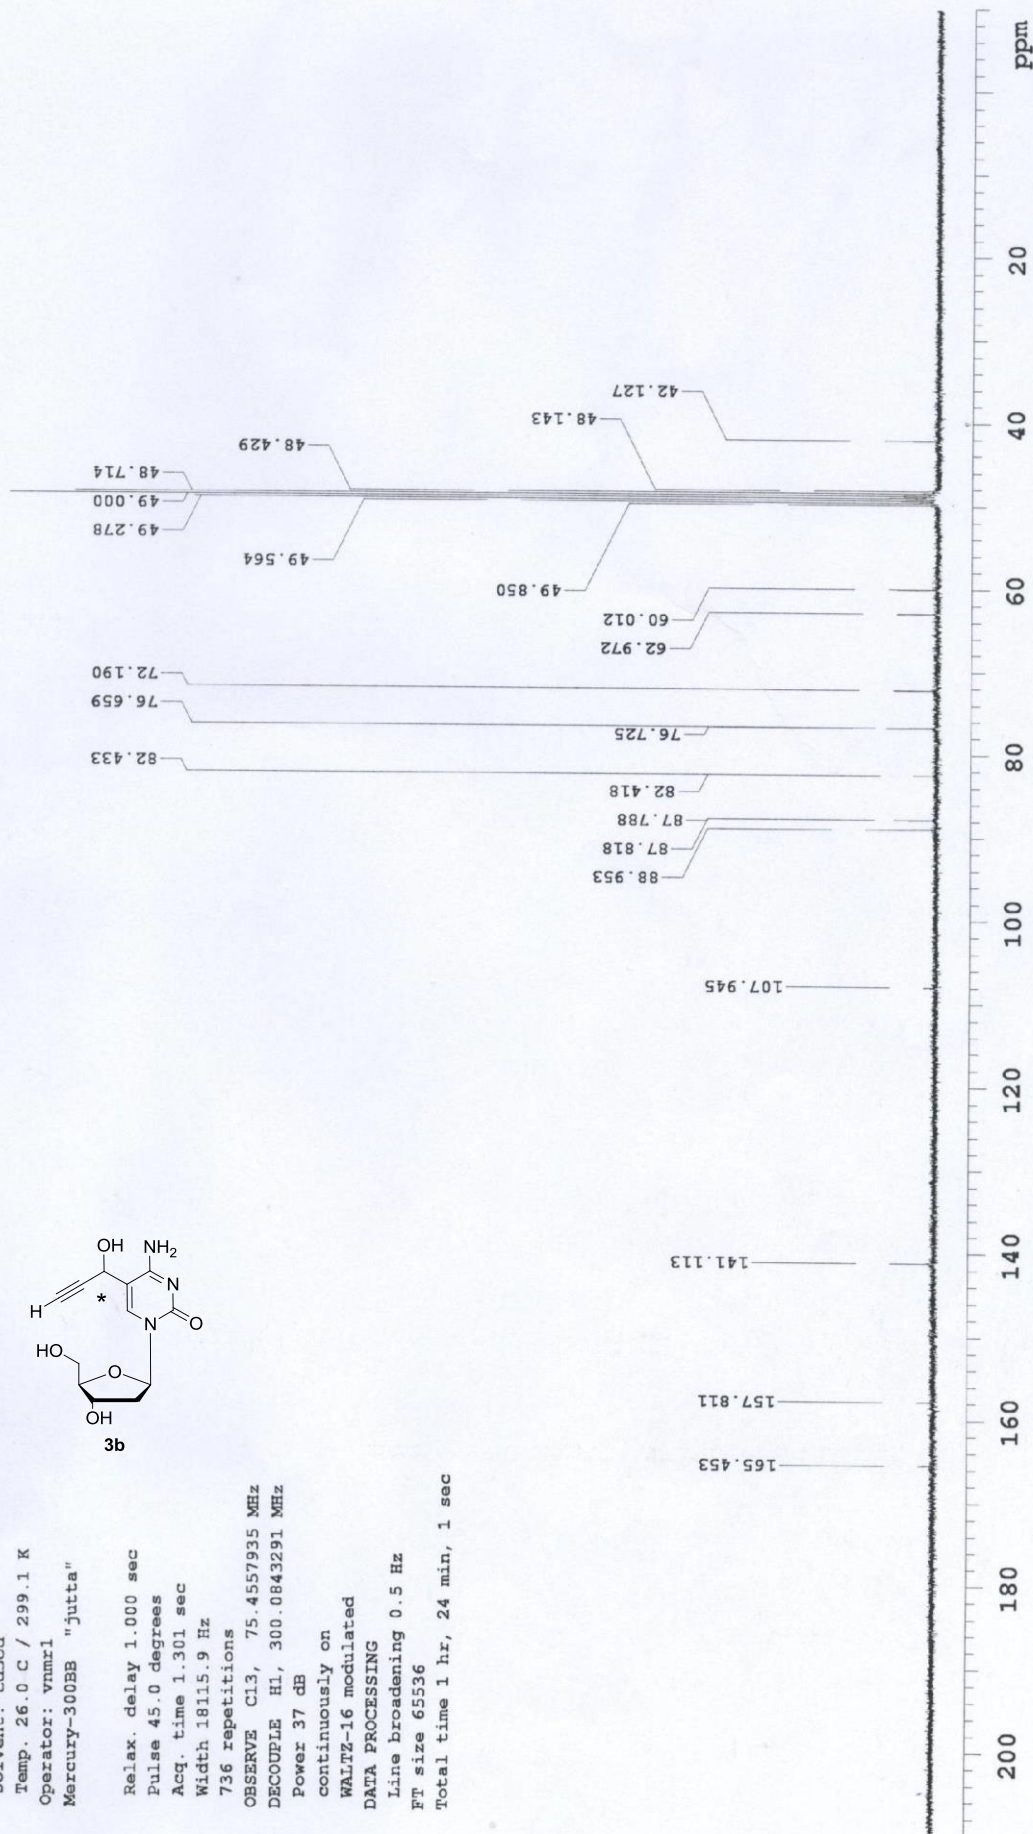



A. Chentsova

Sample: AC5-454

Pulse Sequence: s2pul

Solvent: cd3od

Temp. 26.0 C / 299.1 K

Operator: vnmr1

Mercury-300BB "jutta"

Relax. delay 1.000 sec

Pulse 29.7 degrees

Acq. time 1.998 sec

Width 4800.8 Hz

20 repetitions

OBSERVE H1, 300.0828754 MHz

DATA PROCESSING

FT size 32768

Line broadening 0.1 Hz

Total time 1 min, 47 sec

8.083

8.065

7.478

7.460

7.450

7.432

7.416

7.378

7.351

7.334

6.286

6.260

6.242

6.233

5.583

5.496

4.896

4.837

4.823

4.002

3.988

3.776

3.762

3.738

3.361

3.341

3.322

3.311

2.497

2.481

2.472

2.462

2.437

2.427

2.150

2.132

2.117

2.106

2.092

2.081

2.066

2.047

1.023

0.975

0.962

0.948

0.919

0.881

0.850

0.815

0.788

0.158

0.140

0.115

0.084

0.070

0.059

0.043

0.031

0.021

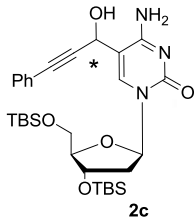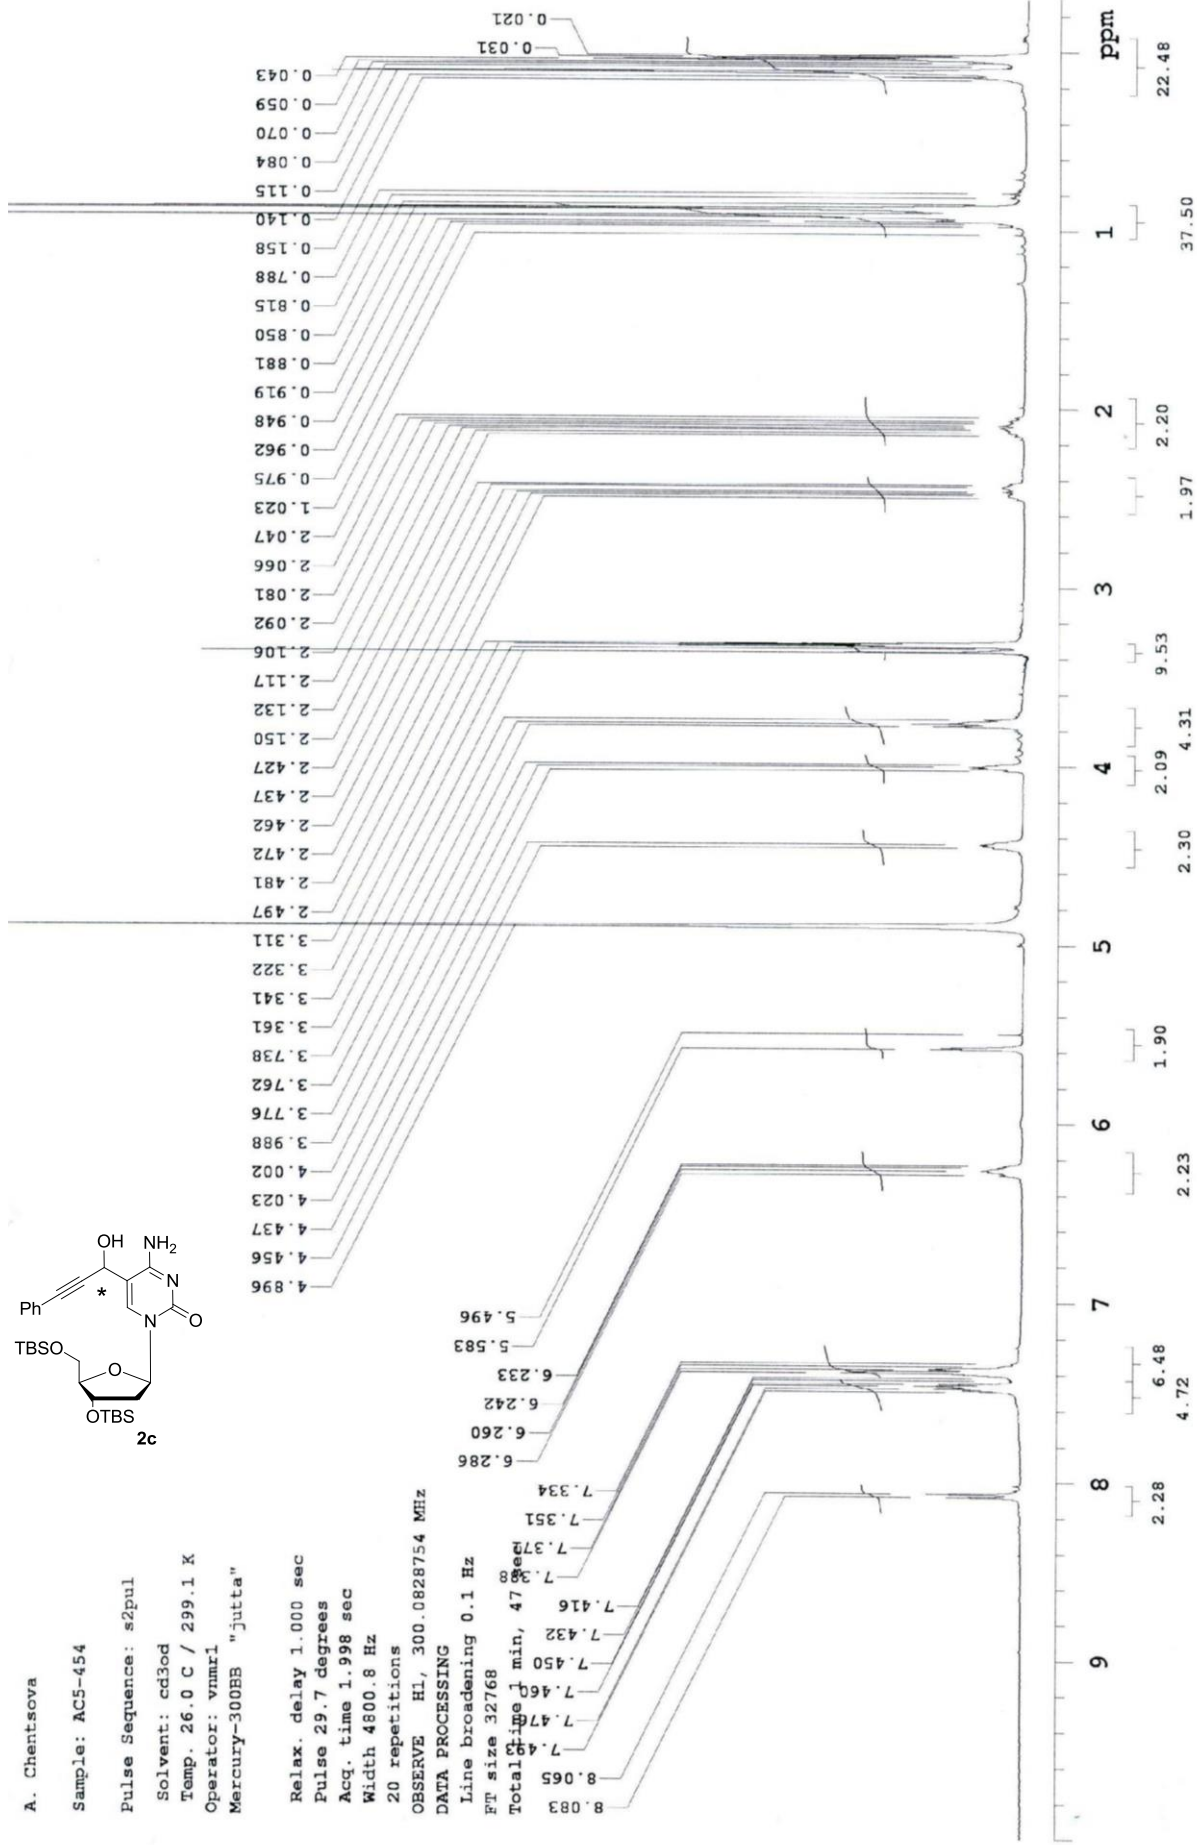

A. Chentsova

Sample: AC-5-454

Pulse Sequence: s2pul

Solvent: cd3od

Temp. 26.0 C / 299.1 K

Operator: vmr1

Mercury-300BB "jutta"

Relax. delay 1.000 sec

Pulse 45.0 degrees

Acq. time 1.301 sec

Width 18115.9 Hz

1168 repetitions

OBSERVE C13, 75.4557996 MHz

DECOUPLE H1, 300.0843291 MHz

Power 37 dB

continuously on

WALTZ-16 modulated

DATA PROCESSING

Line broadening 0.5 Hz

FT size 65536

Total time 1 hr, 24 min, 1 sec

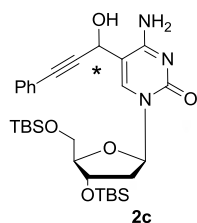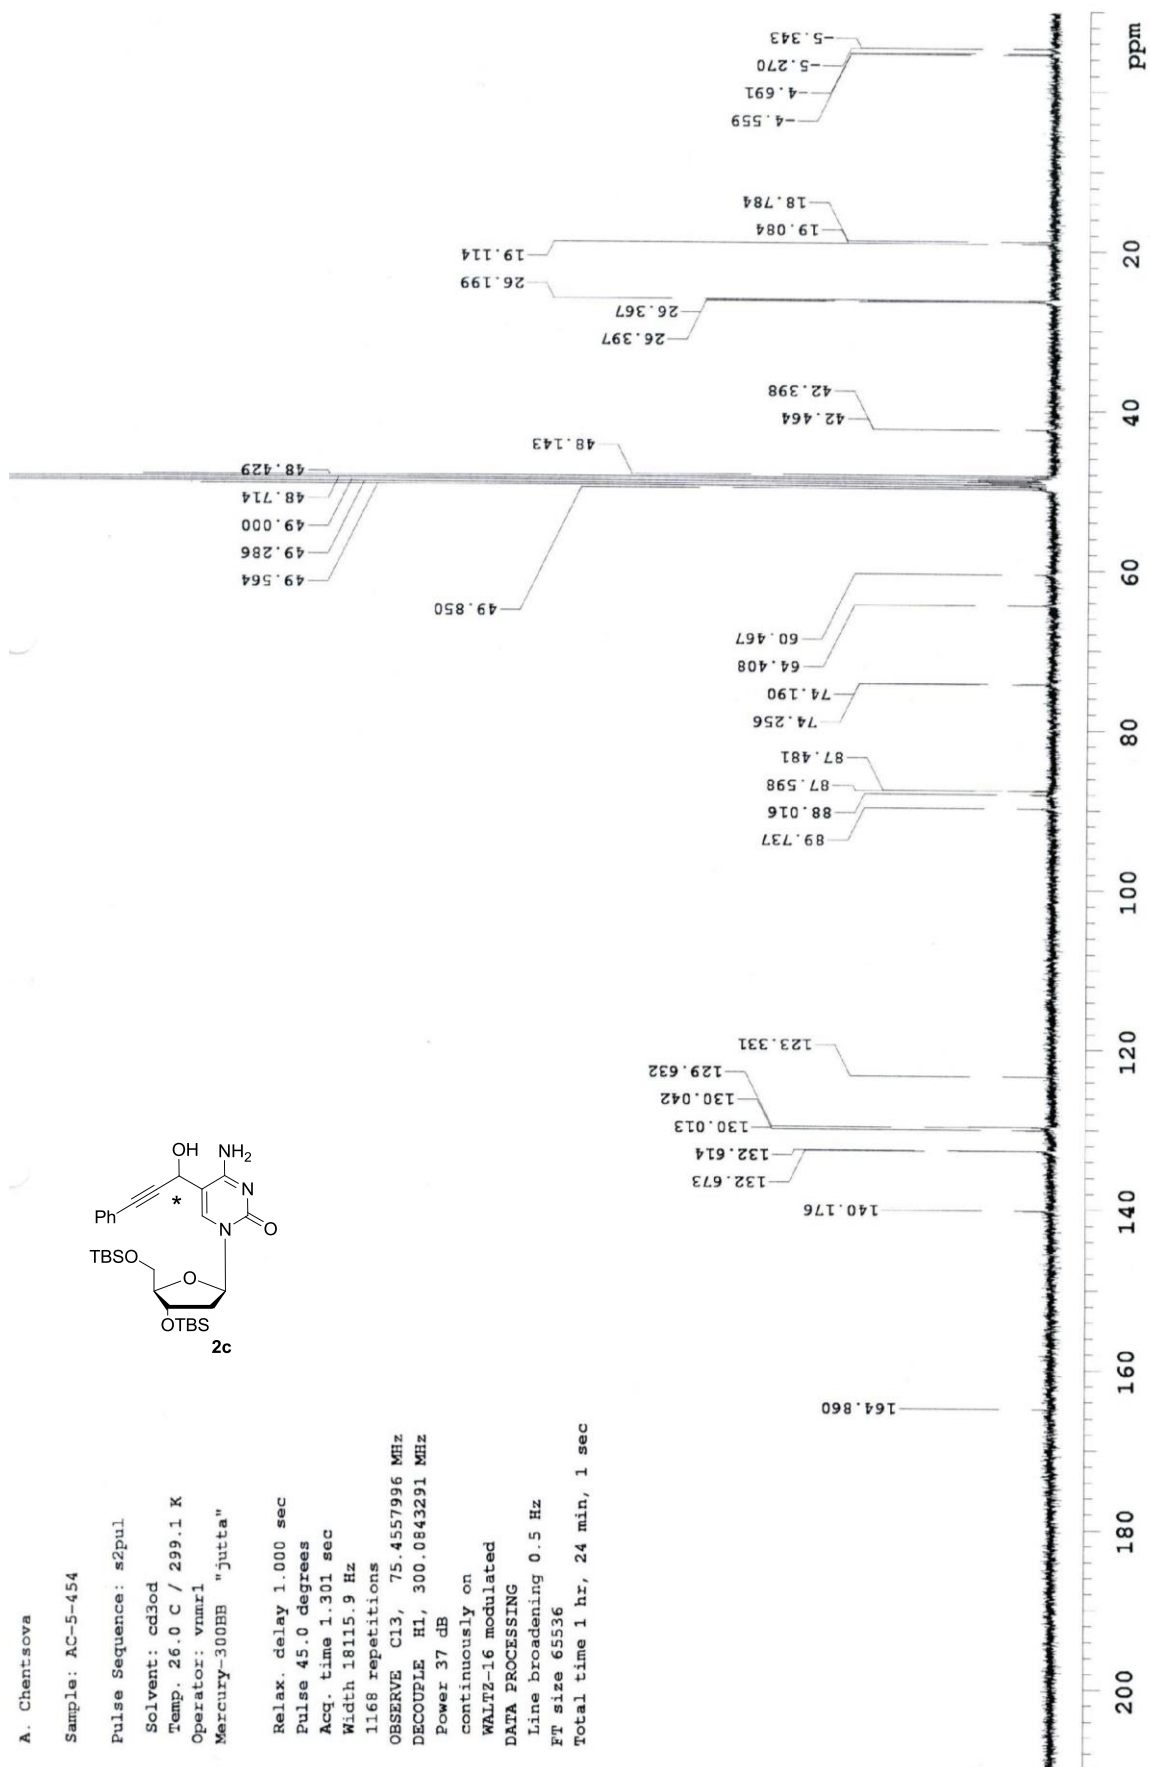

A. Chentsova

Sample: ACS-IPR1

Pulse Sequence: s2pul

Solvent: cd3od

Temp. 26.0 C / 299.1 K

Operator: vnmr1

Mercury-300BB "jutta"

Relax. delay 1.000 sec

Pulse 29.7 degrees

Acq. time 1.998 sec

Width 4800.8 Hz

32 repetitions

OBSERVE H1, 300.0828811 MHz

DATA PROCESSING

Line broadening 0.2 Hz

FT size 32768

Total time 1 min, 47 sec

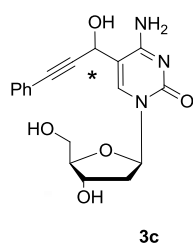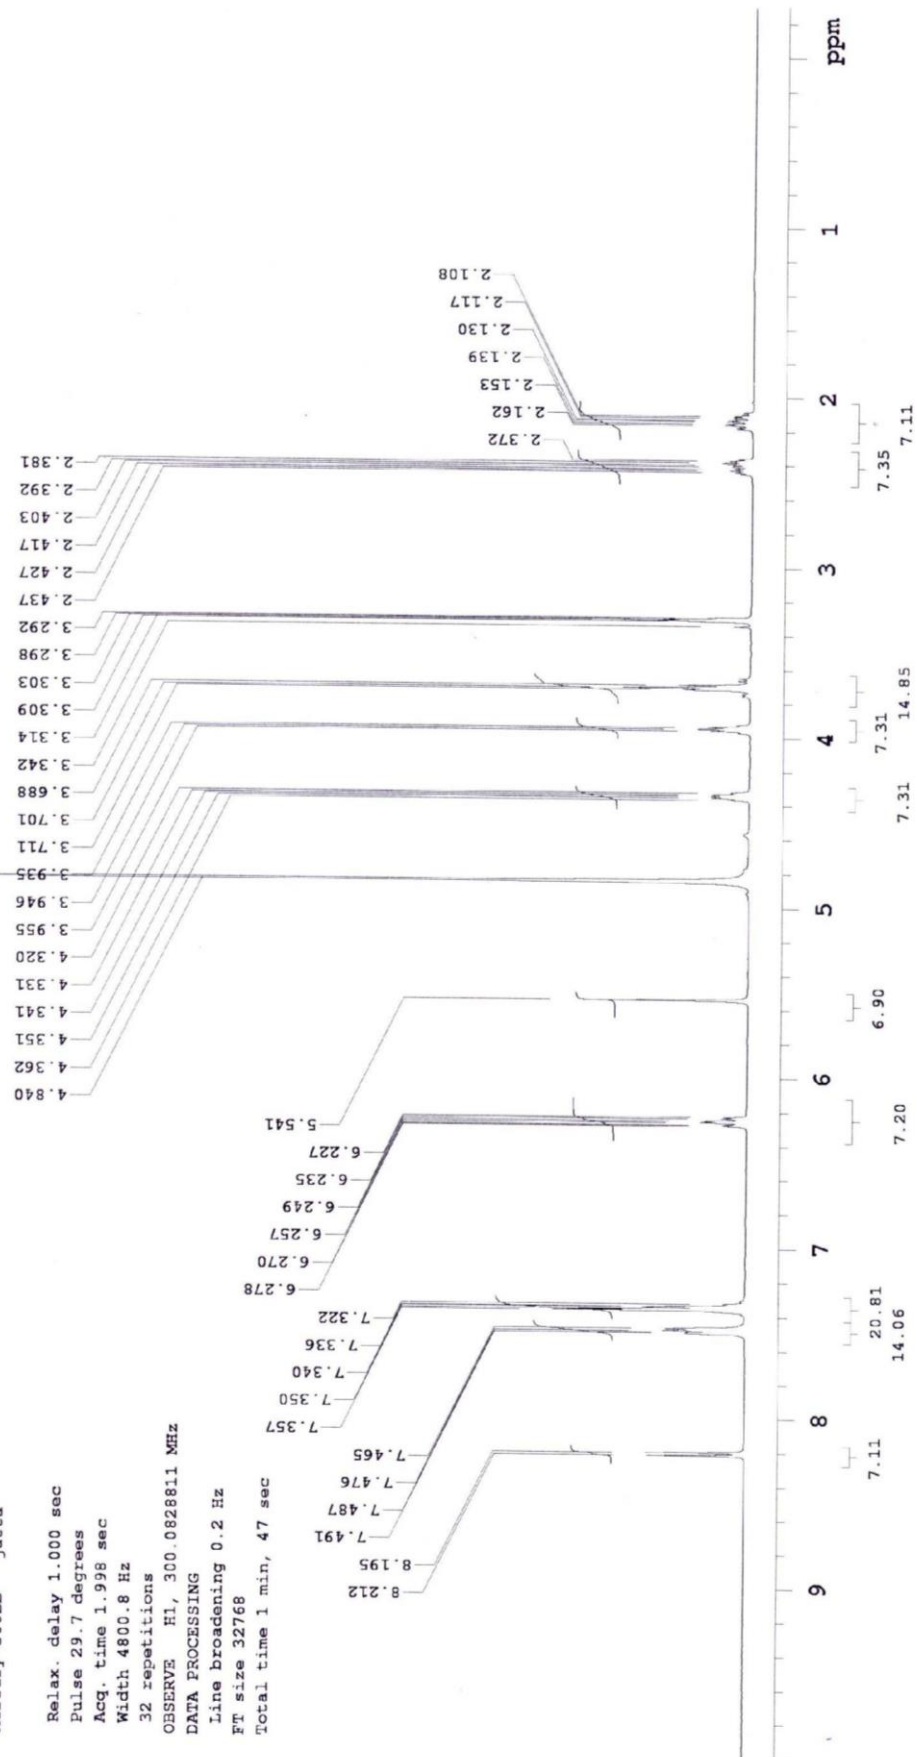

Chentsova

Sample: AC 5-IPR1

Pulse Sequence: s2pul

Date: Apr 16 2013

Solvent: cd3od

Temp. 26.0 C / 299.1 K

Operator: walkup

Mercury-400BB "felix"

Relax. delay 1.000 sec

Pulse 45.0 degrees

Acq. time 1.300 sec

Width 24154.6 Hz

512 repetitions

OBSERVE C13, 100.5797156 MHz

DECOUPLE H1, 400.0010689 MHz

Power 38 dB

continuously on

WALTZ-16 modulated

DATA PROCESSING

Line broadening 0.5 Hz

FT size 65536

Total time 1 hr, 25 min, 53 sec

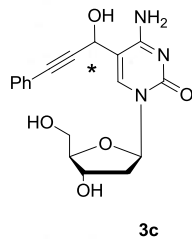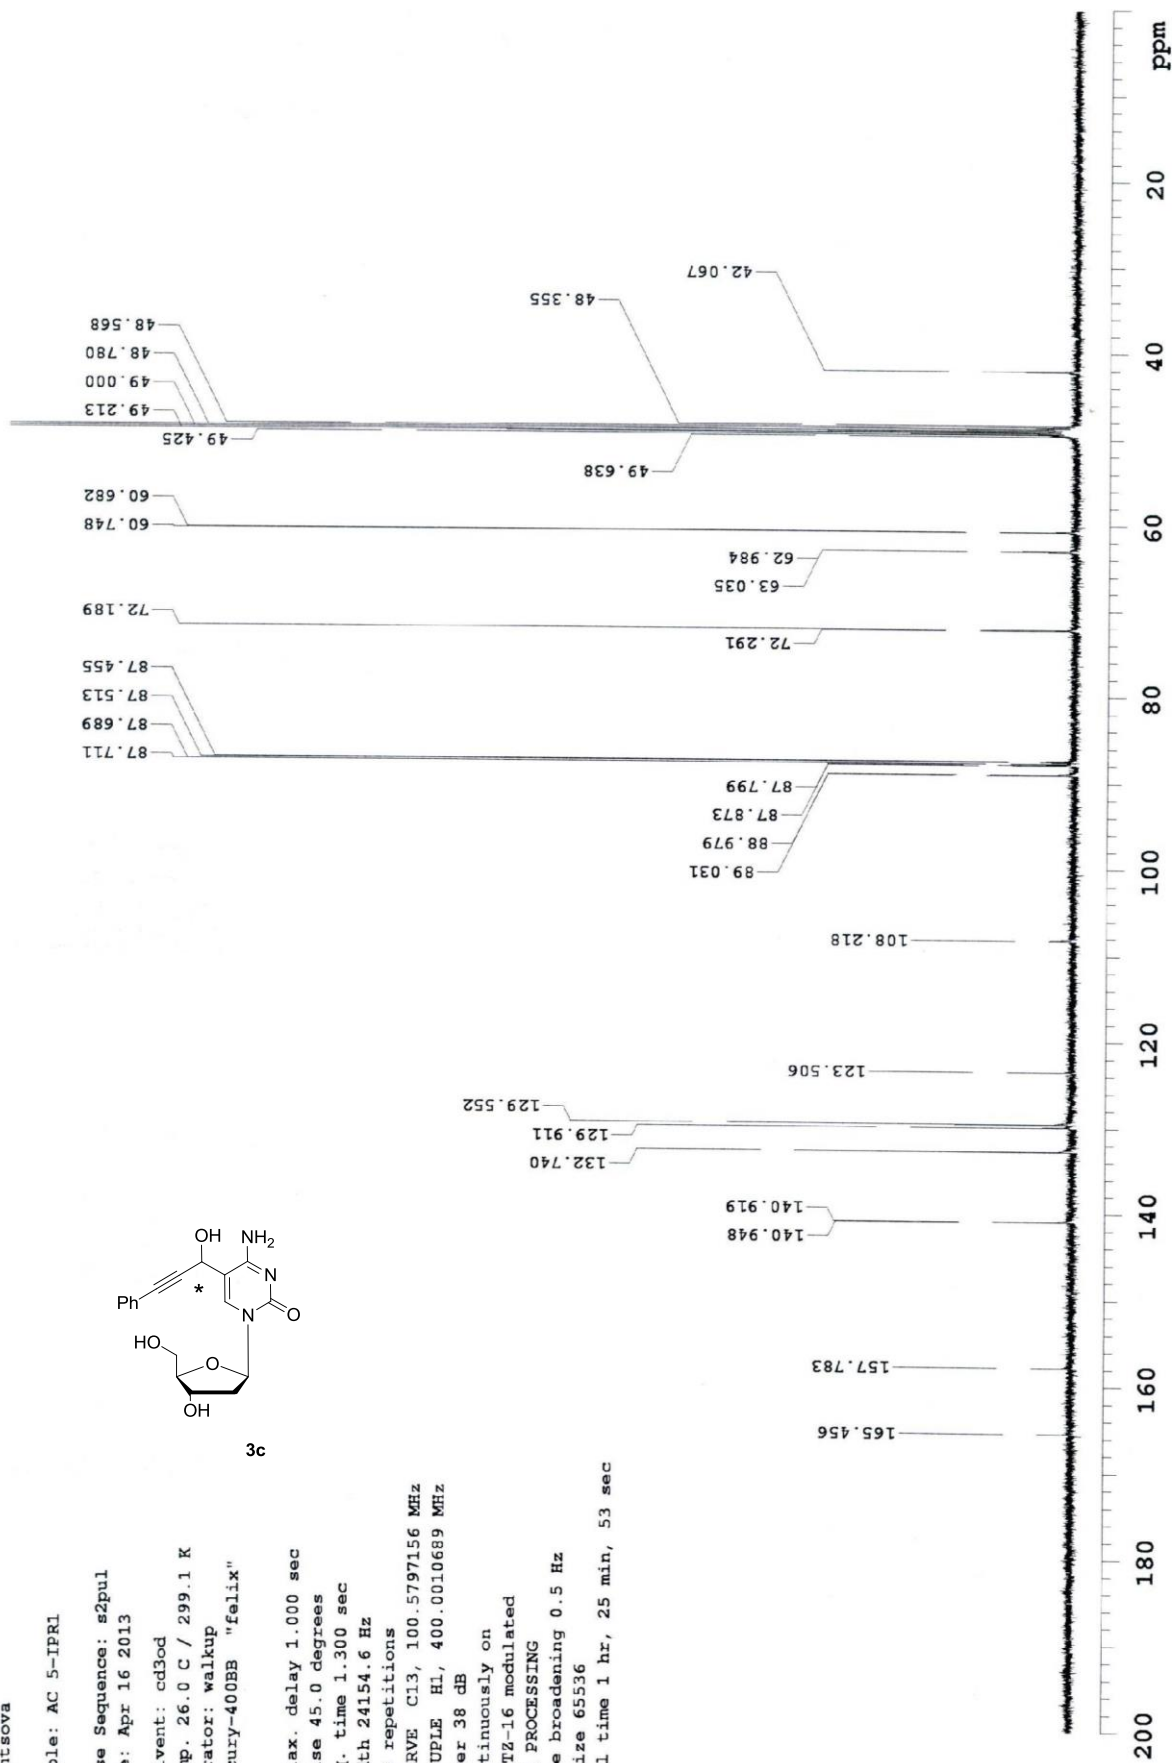

A. Chentsova

Sample: AC5-27A

Pulse Sequence: #2pul

Solvent: cd3od

Temp. 26.0 C / 299.1 K

Operator: vnmr1

Mercury-300BB "jutta"

Relax. delay 1.000 sec

Pulse 29.7 degrees

Acq. time 1.998 sec

Width 4800.8 Hz

32 repetitions

OBSERVE H1, 300.0828754 MHz

DATA PROCESSING

Line broadening 0.2 Hz

FT size 32768

Total time 3 Min

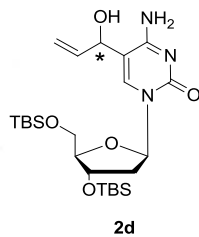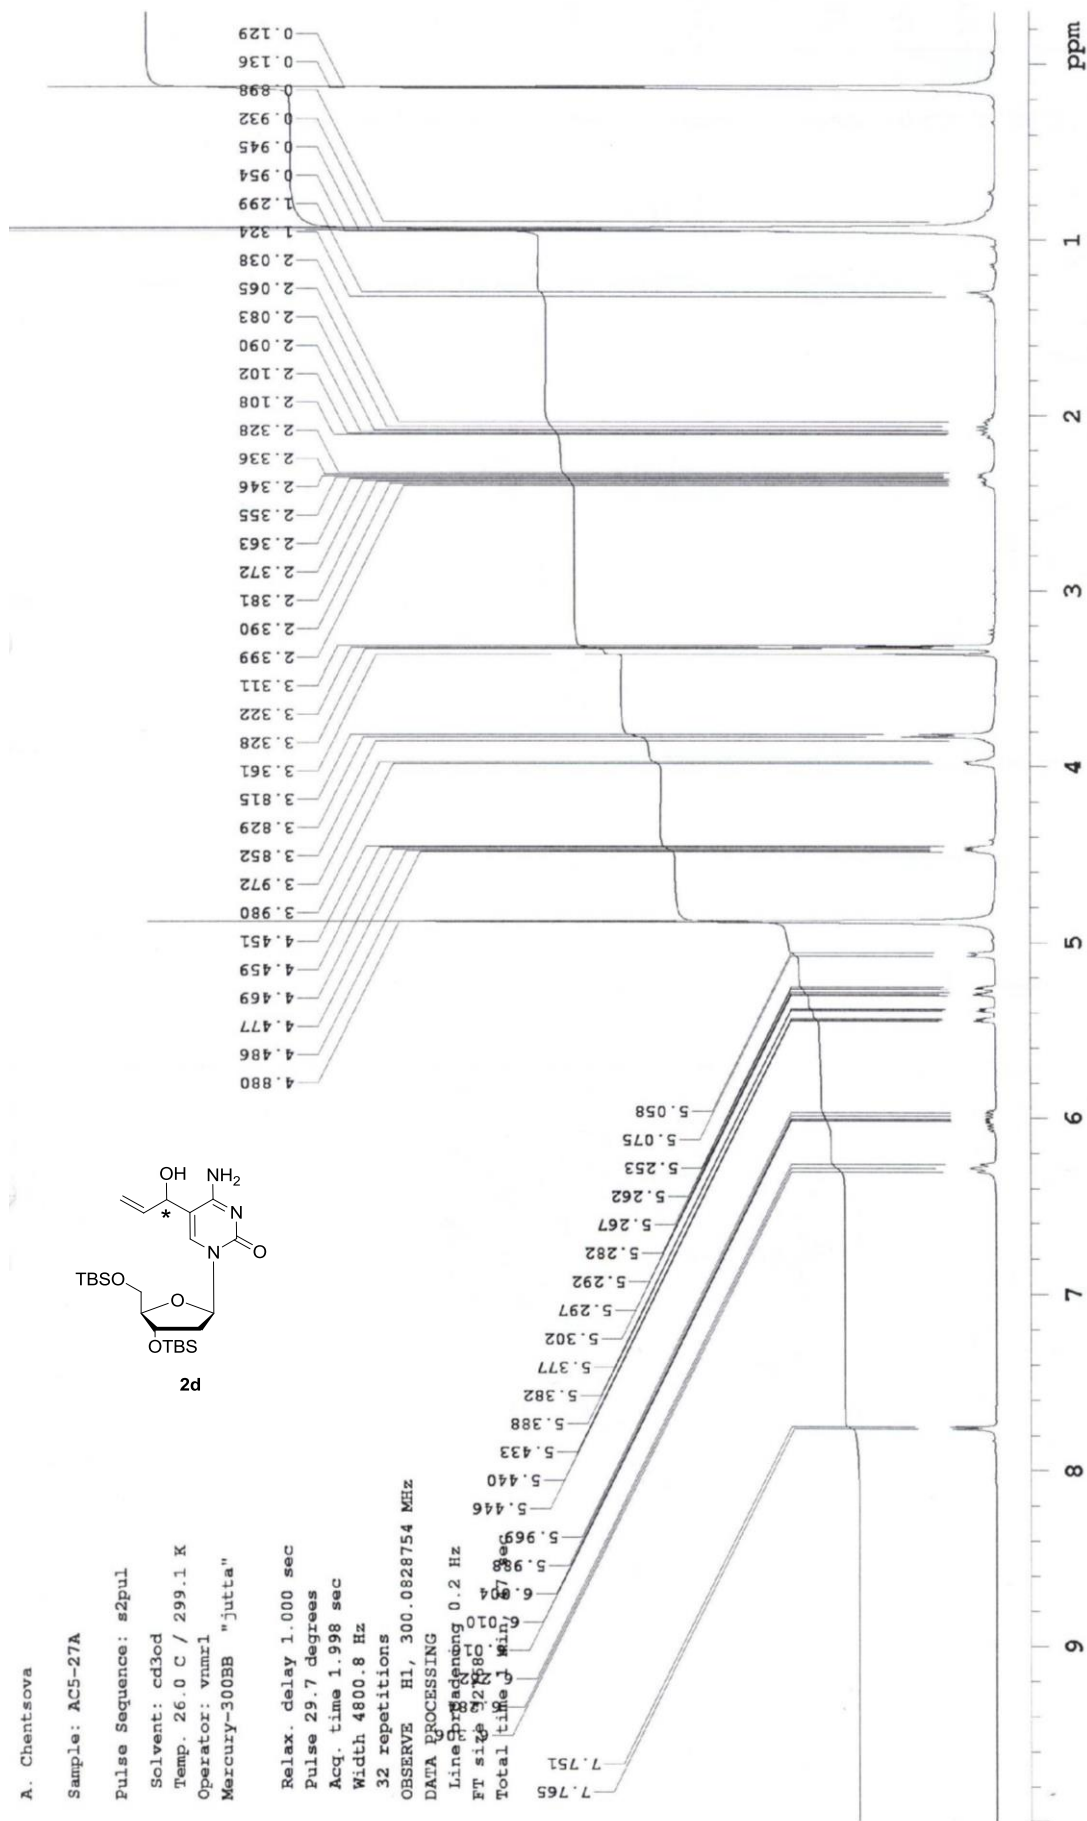

Attached proton test experiment

Sample: AC5-27A

Pulse Sequence: APT

Solvent: cd3od

Temp. 26.0 C / 299.1 K

Operator: vmr1

Mercury-300BB "jutta"

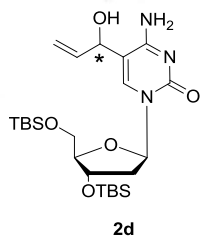

Relax. delay 1.000 sec  
1st pulse 90.0 degrees  
2nd pulse 135.0 degrees  
Acq. time 1.000 sec  
Width 18115.9 Hz  
5000 repetitions  
OBSERVE C13, 75.4557969 MHz  
DECOUPLE H1, 300.0843291 MHz  
Power 37 dB  
on during acquisition  
WALTZ-16 modulated  
DATA PROCESSING  
Line broadening 1.0 Hz  
Ft size 65536  
Total time 28 hr, 56 min, 53 sec

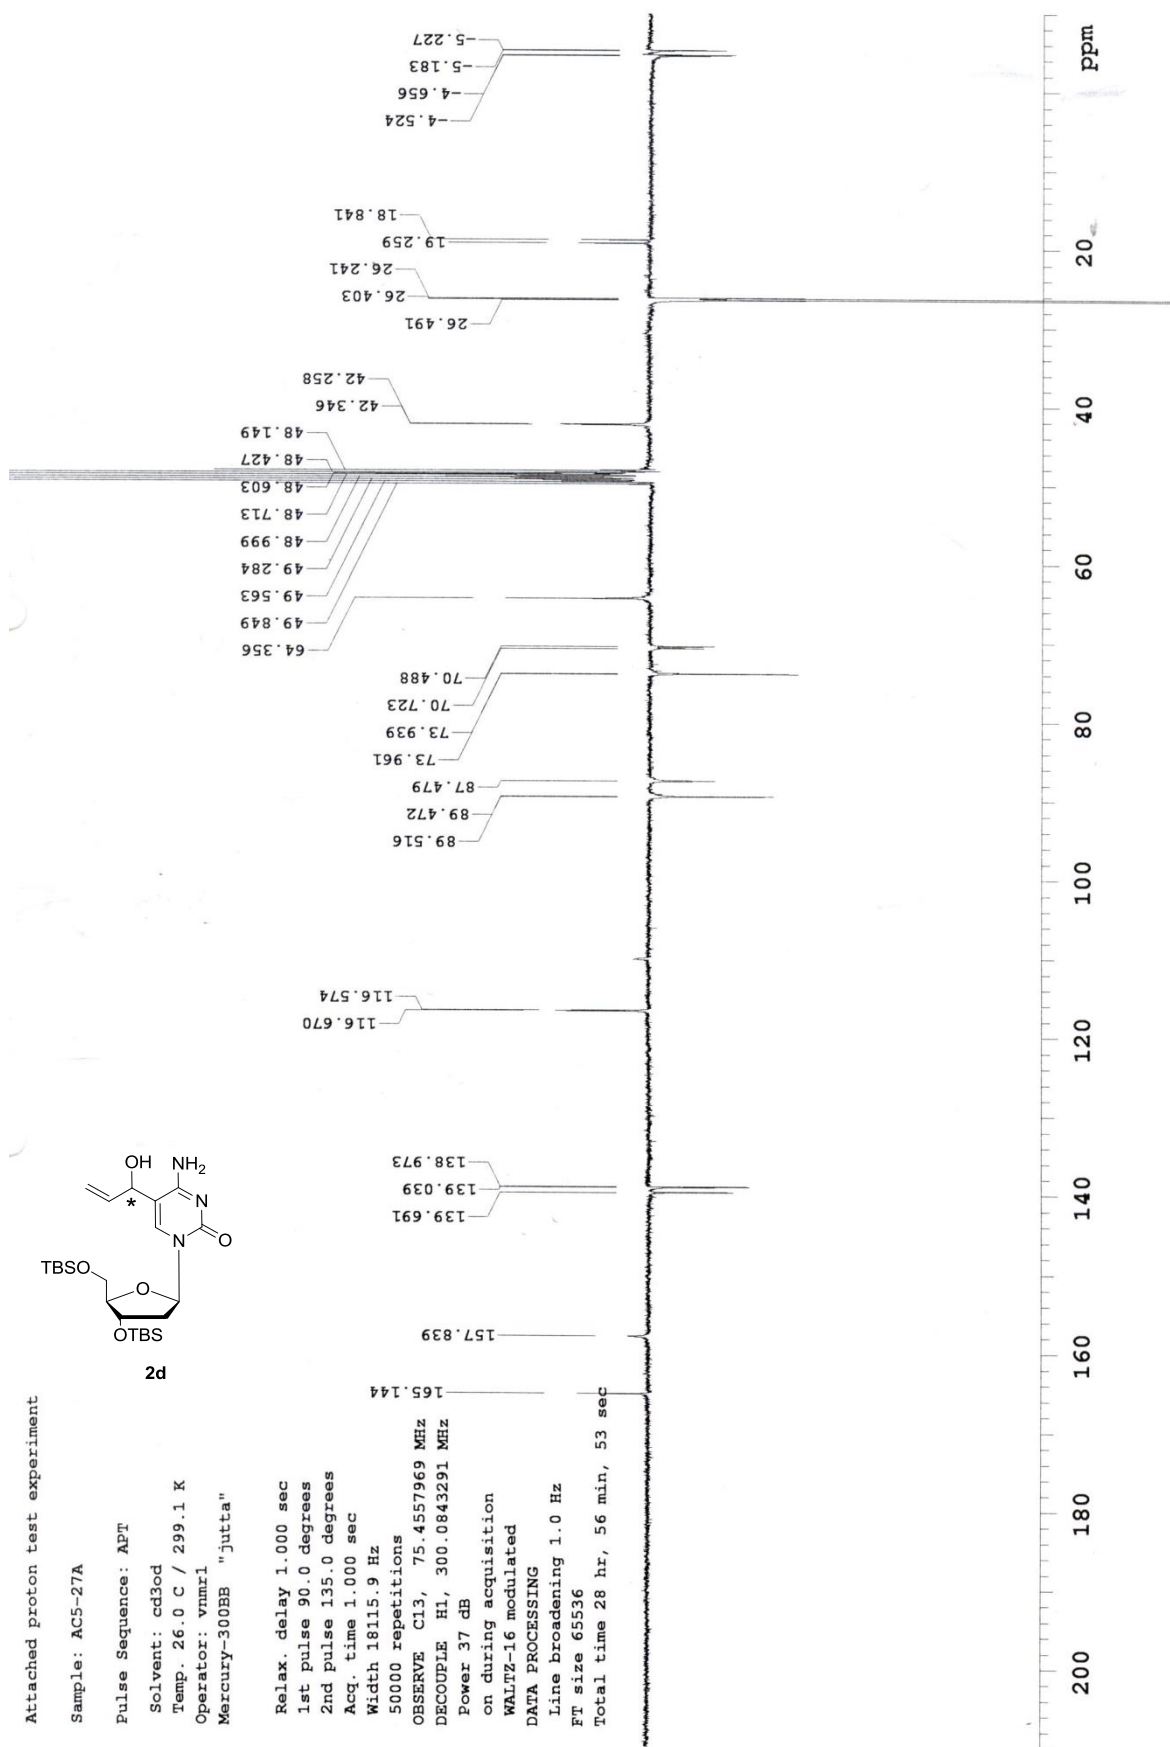



A. Chentsova

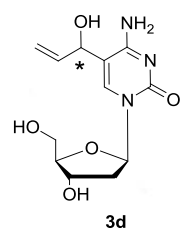

Sample: AC5-JN

Pulse Sequence: s2pul

Date: Apr 8 2013

Solvent: cd3od

Temp. 26.0 C / 299.1 K

Operator: walkup

Mercury-400BB "felix"

Relax. delay 1.000 sec

Pulse 29.7 degrees

Acq. time 1.996 sec

Width 6393.0 Hz

32 repetitions

OBSERVE F1: 399.999123 MHz

DATA PROCESSING 0.0 Hz

Line broadening 0.1 Hz

FT size 32768

Total time 1 min, 50 sec

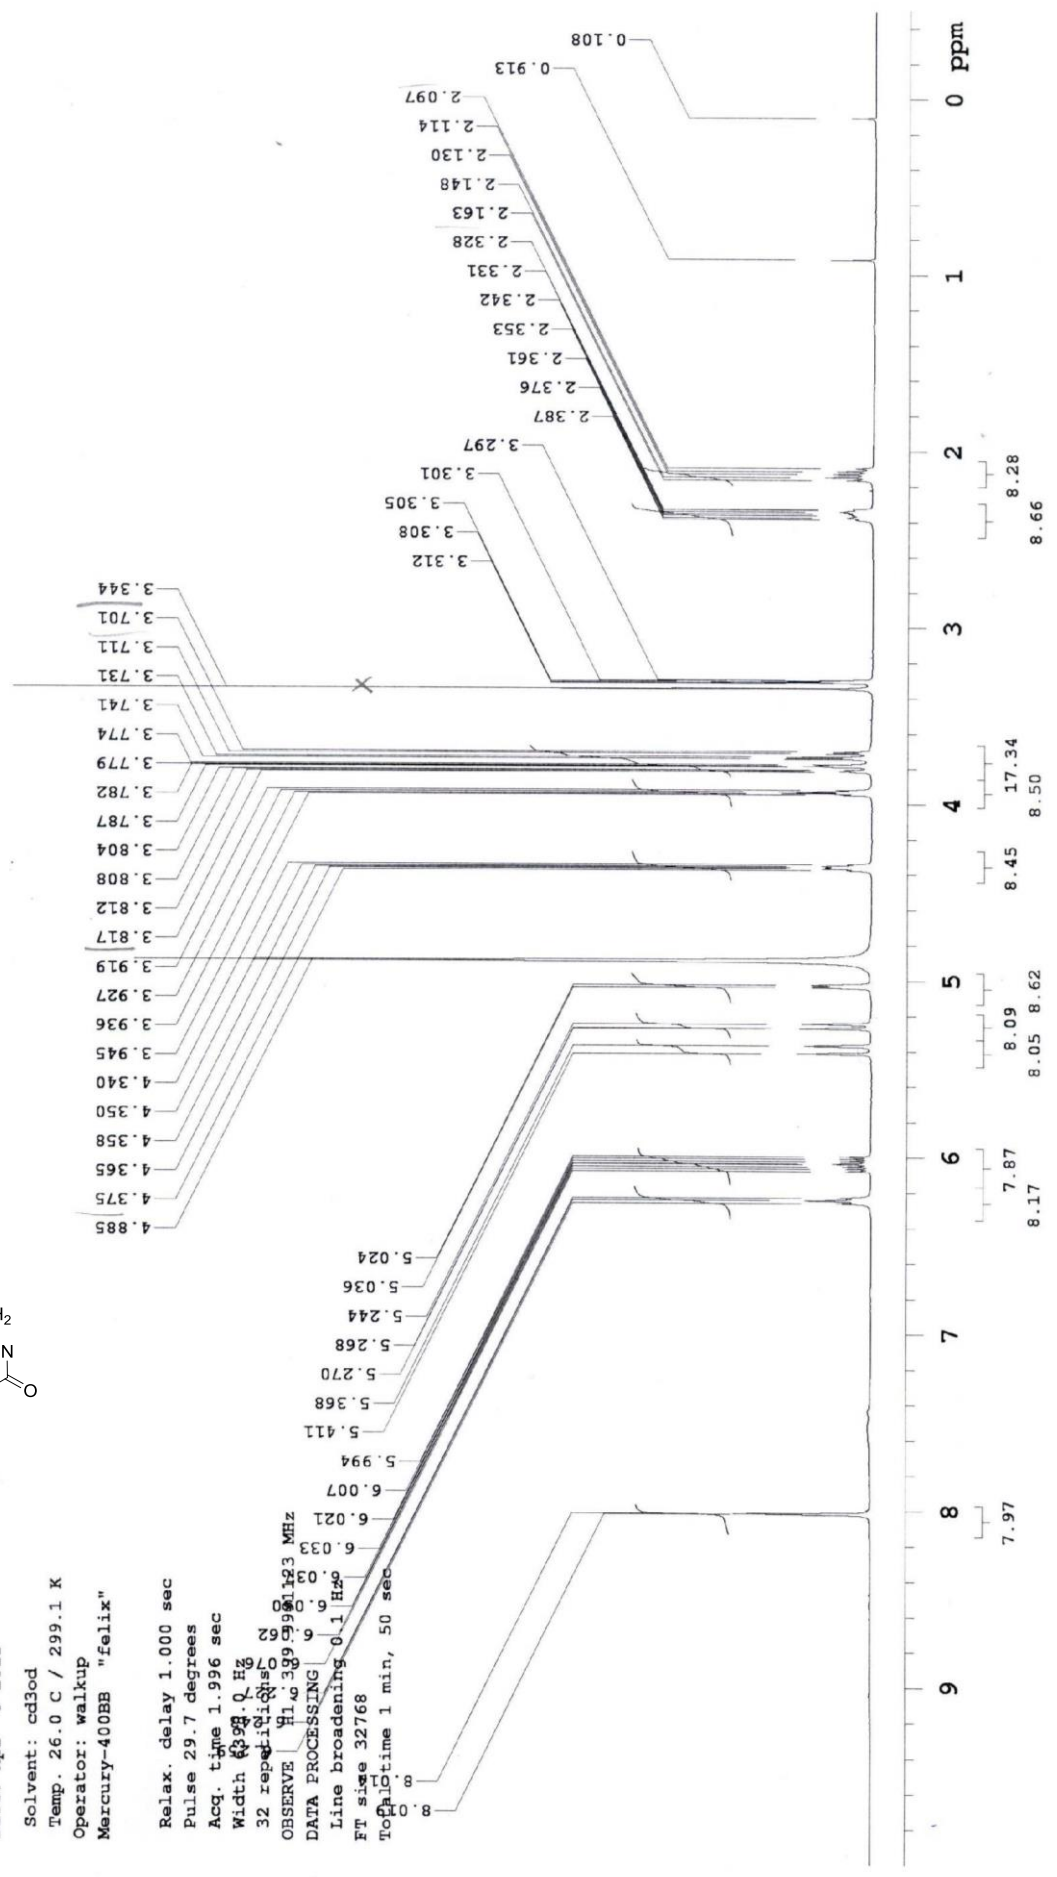

Chentsova

Sample: AC 5-IN

Pulse Sequence: s2pul

Solvent: cd3od

Temp. 26.0 C / 299.1 K

Operator: vnmr1

Mercury-300BB "jutta"

Relax. delay 1.000 sec

Pulse 45.0 degrees

Acq. time 1.301 sec

Width 18115.9 Hz

528 repetitions

OBSERVE C13, 75.4557963 MHz

DECOUPLE H1, 300.0843291 MHz

Power 37 dB

continuously on

WALTZ-16 modulated

DATA PROCESSING

Line broadening 0.5 Hz

FT size 65536

Total time 42 min, 2 sec

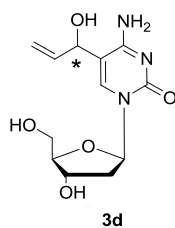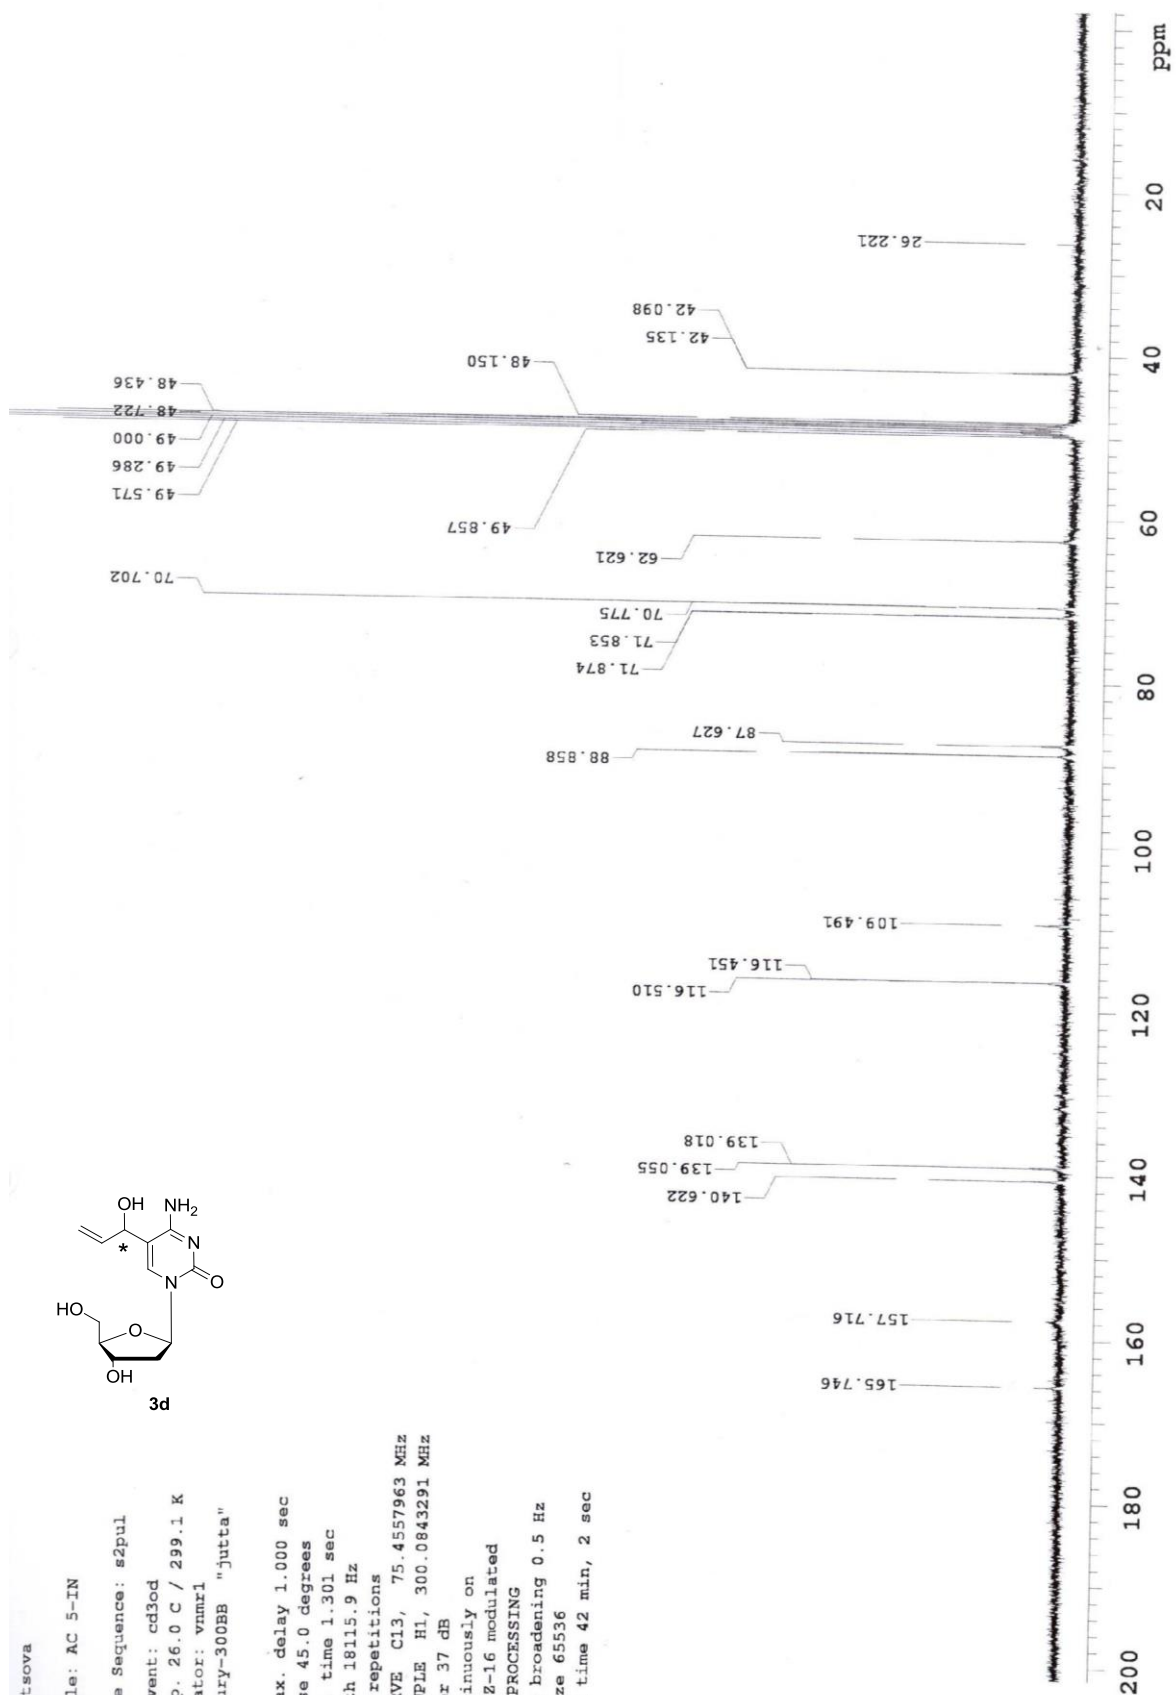



CC(C)(C)OC(=O)Nc1nc(=O)n(C2C(OTBS)C(OTBS)CO2)c1C=O

Pulse Sequence: s2pul  
Date: Aug 8 2012

Solvent: cdcl3  
Temp. 26.0 C / 299.1 K  
Operator: walkup  
Mercury-400BB "felix"

Relax. delay 1.000 sec  
Pulse 45.0 degrees  
Acq. time 1.996 sec  
Width 6398.0 Hz  
32 repetitions

32 repetitions  
OBSERVE H1, 399.9375361 MHz  
DATA PROCESSING  
Line broadening 0.2 Hz  
FT size 32768  
Total time 1 min, 50 sec

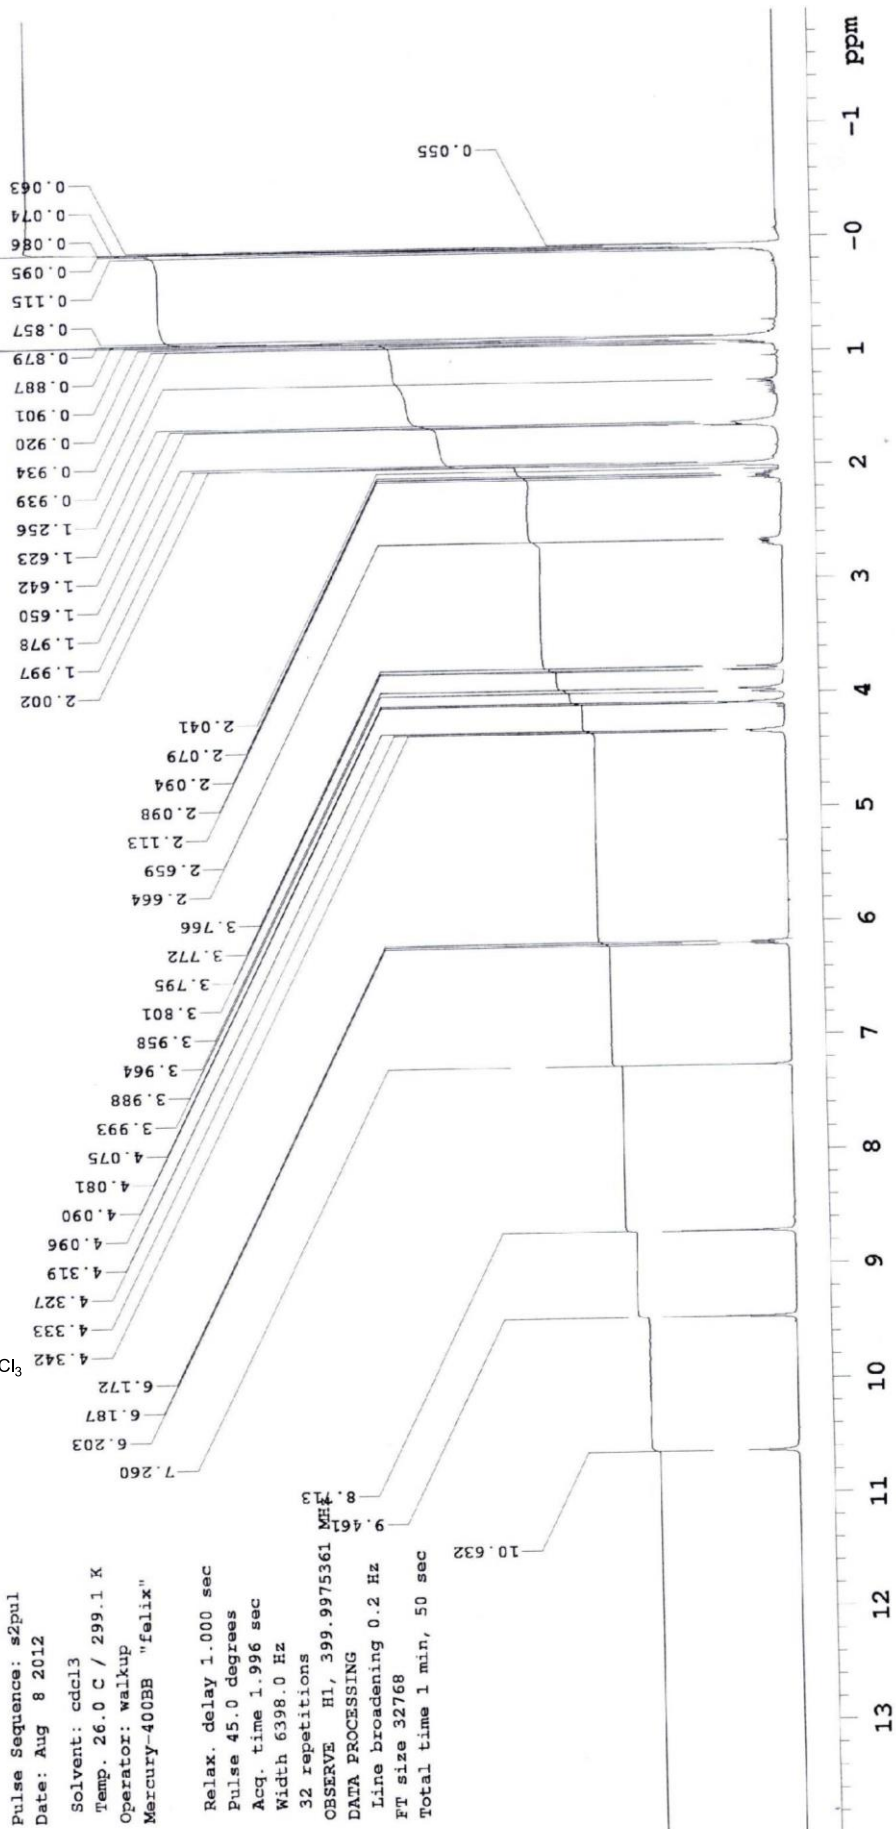

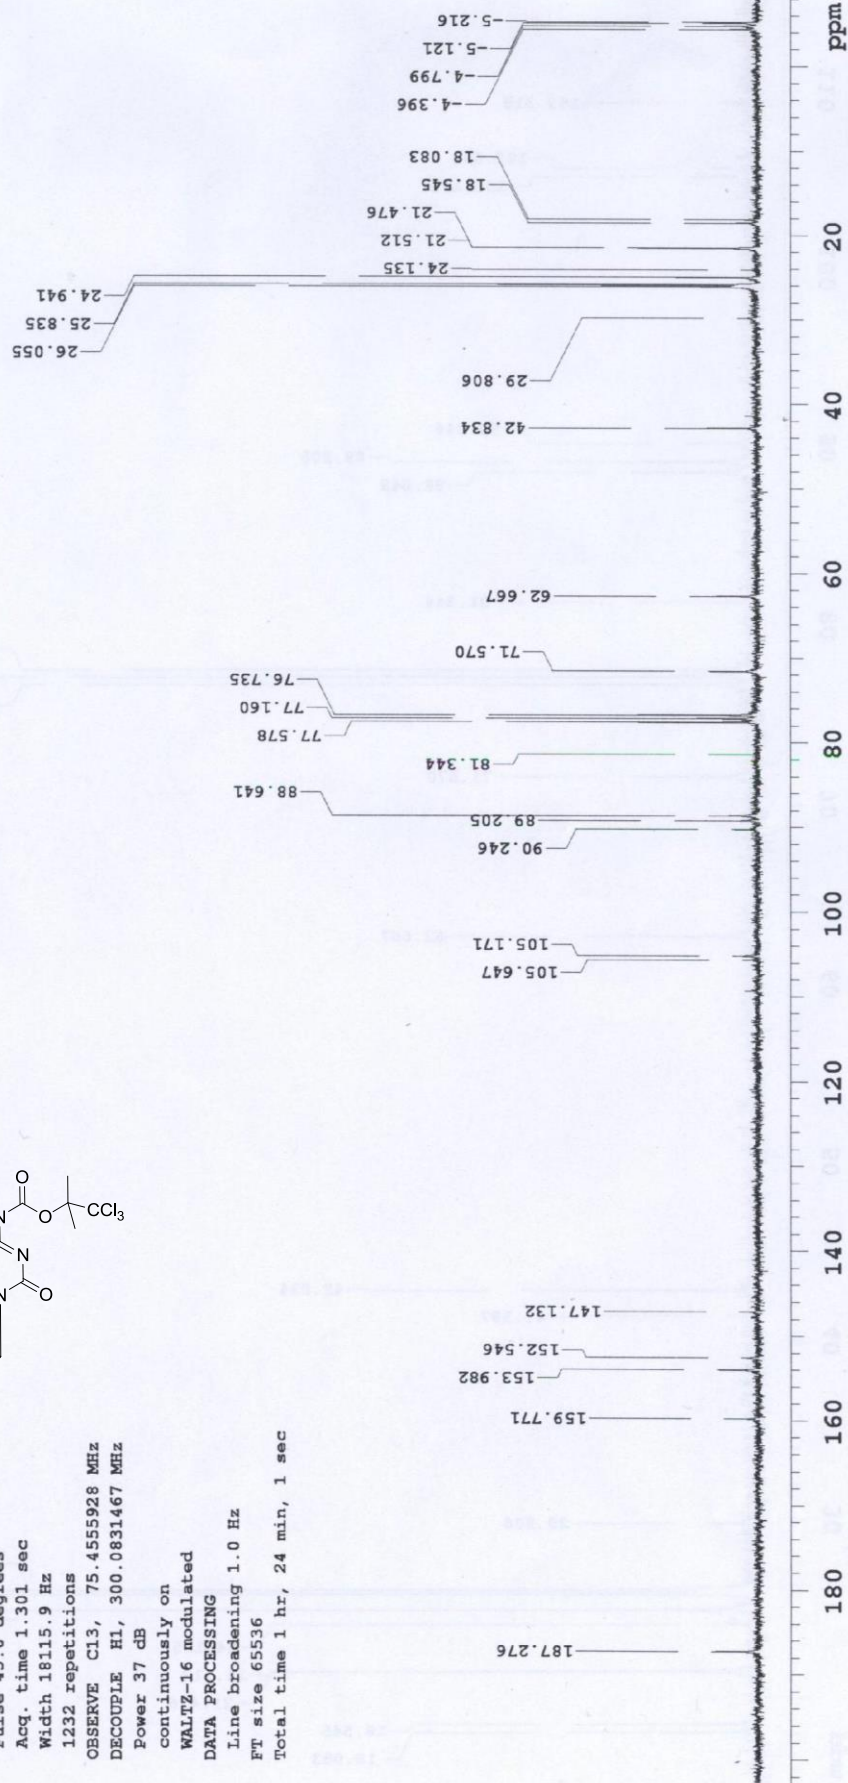

A. Chentsova

Sample: AC5-UP

Pulse Sequence: s2pul

Date: May 16 2012

Solvent: cdcl3

Temp. 26.0 C / 299.1 K

Operator: walkup

Mercury-400BB "felix"

Relax. delay 1.000 sec

Pulse 29.7 degrees

Acq. time 1.996 sec

Width 6398.0 Hz

32 repetitions

OBSERVE H1, 399.9975364 MHz

DATA PROCESSING

Line broadening 0.2 Hz

FT size 32768

Total time 1 min, 50 sec

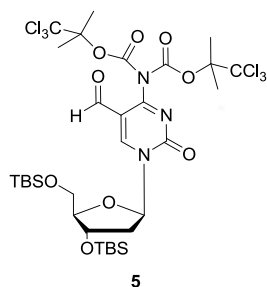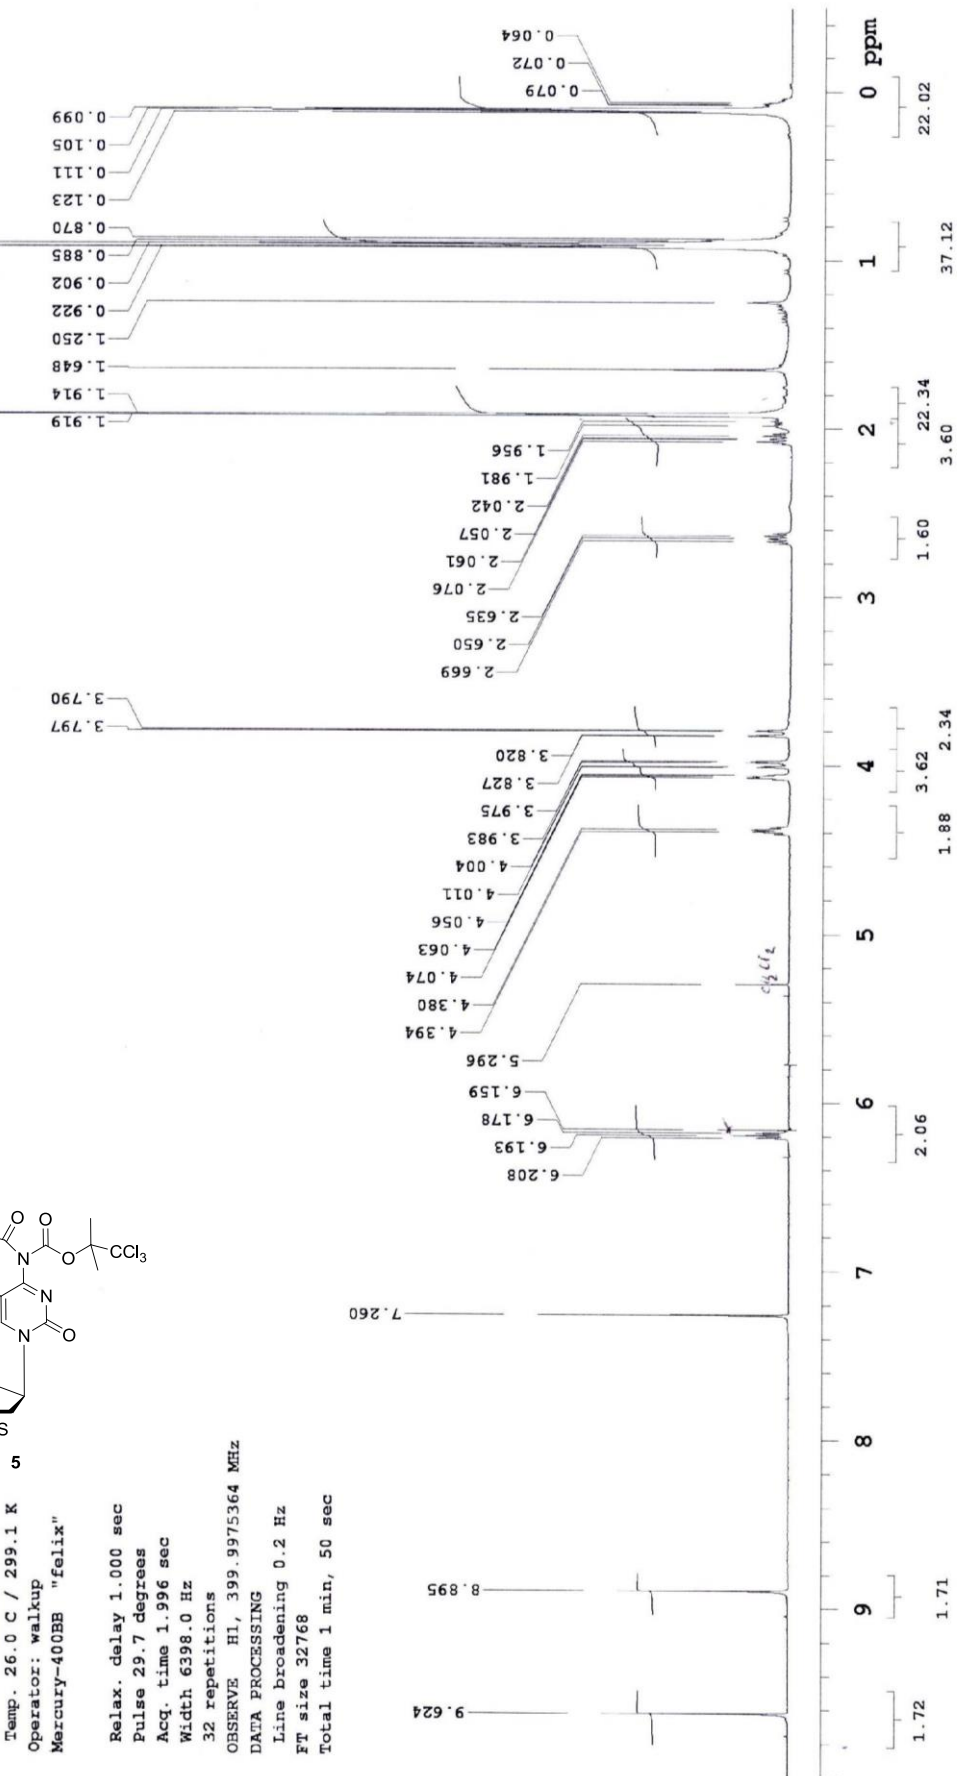



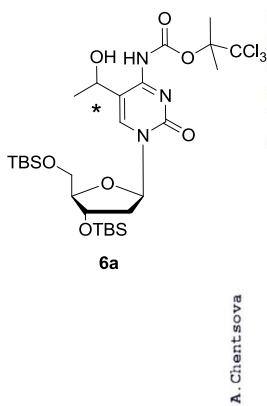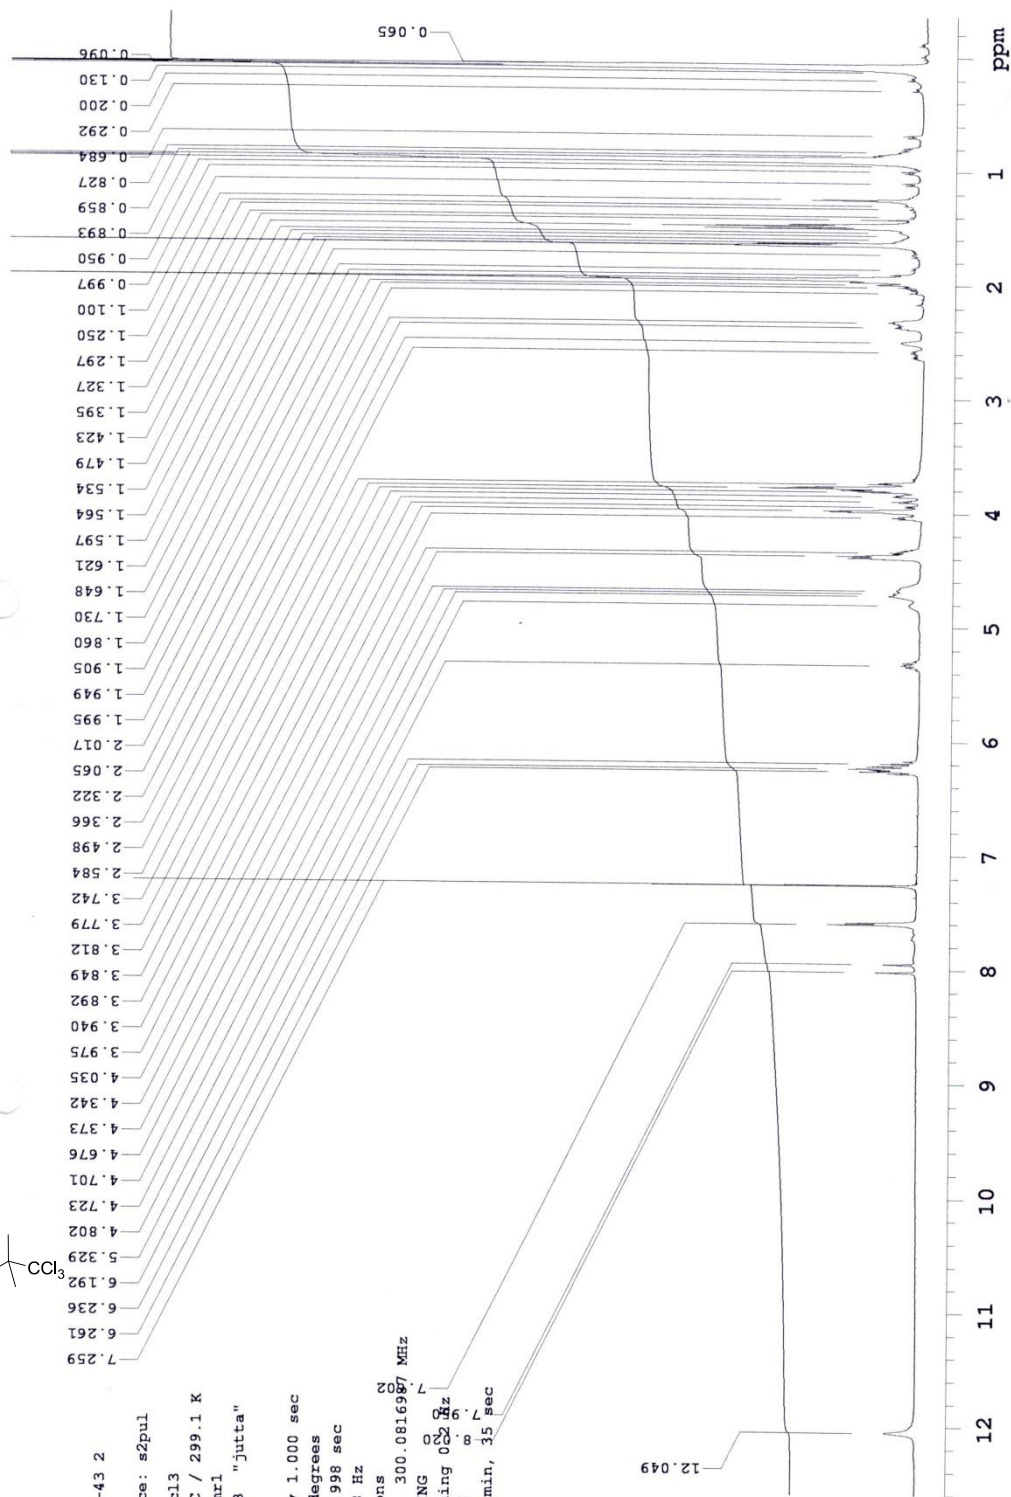



A. Chentsova

Sample: AC5-434

Pulse Sequence: s2pul

Solvent: cdcl3

Temp. 26.0 C / 299.1 K

Operator: vnmr1

Mercury-300BB "jutta"

Relax. delay 1.000 sec

Pulse 29.7 degrees

Acq. time 1.998 sec

Width 4800.8 Hz

32 repetitions

OBSERVE H1, 300.0816988 MHz

DATA PROCESSING

Line broadening 0.1 Hz

FT size 32768

Total time 1 min, 47 sec

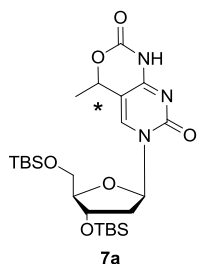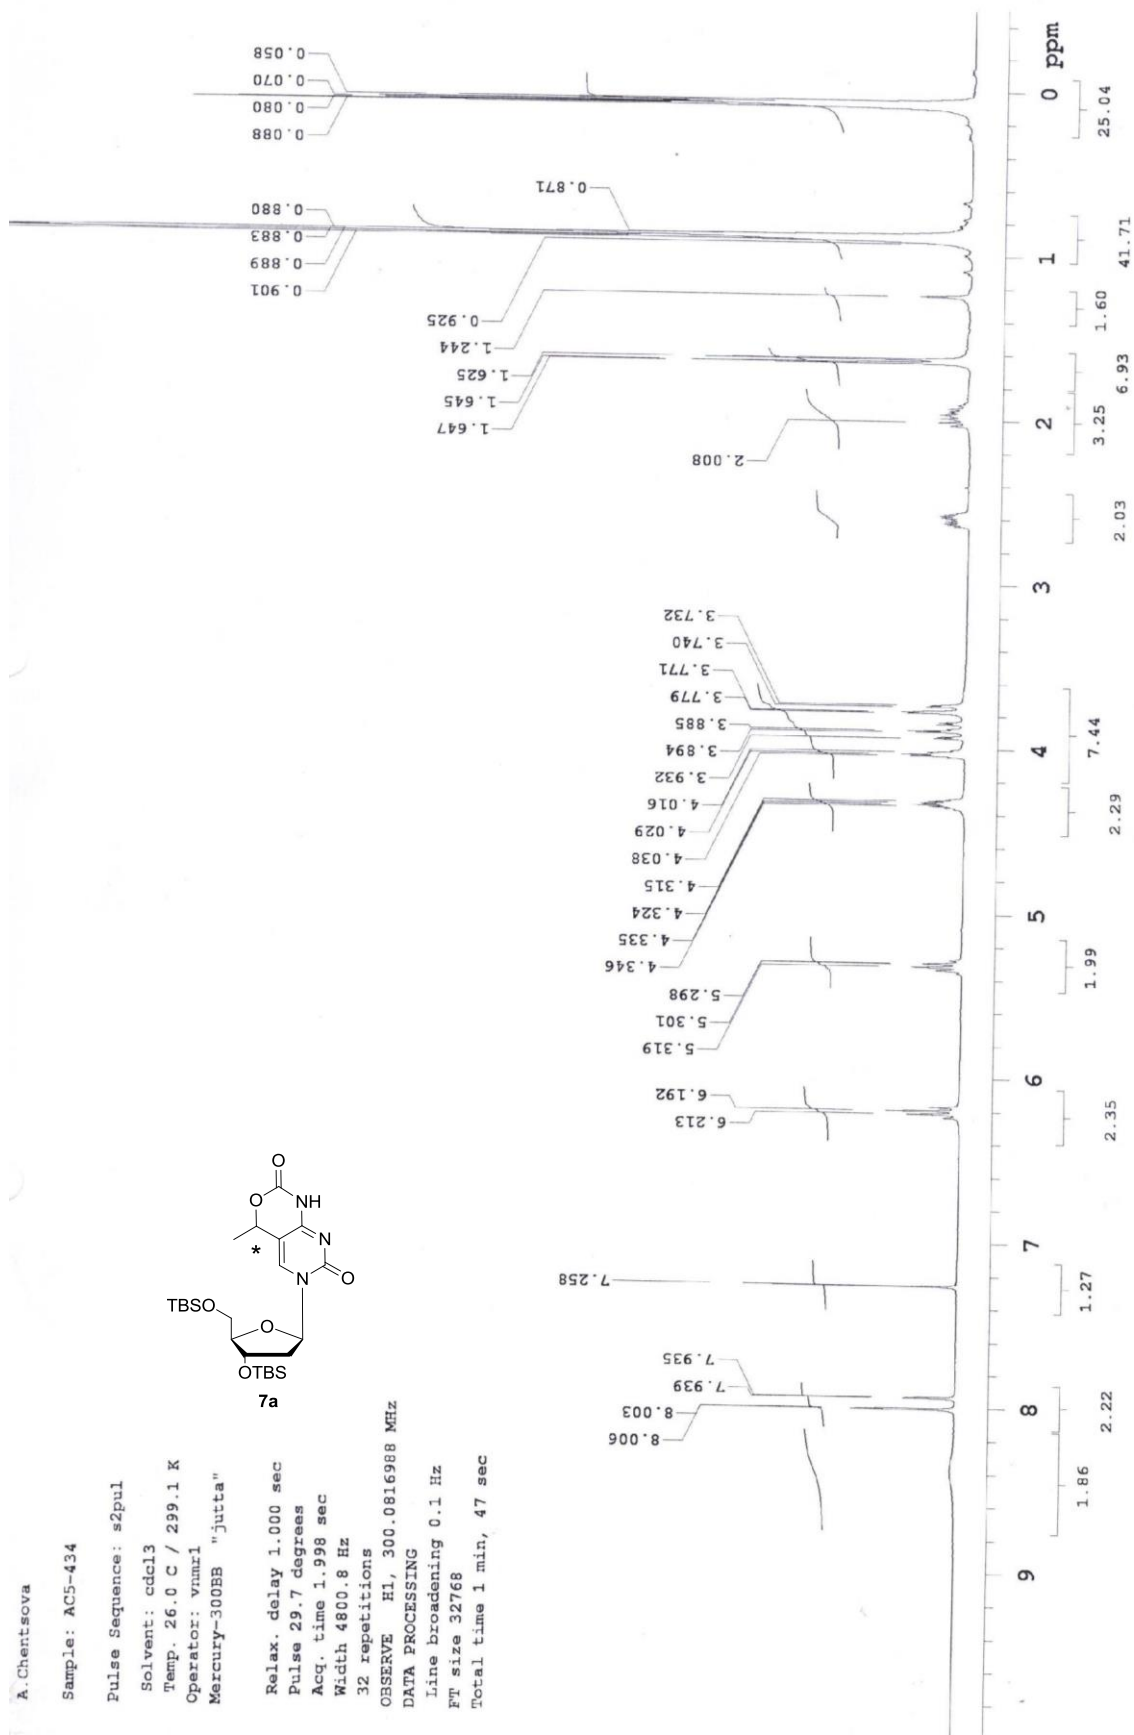

Std Carbon experiment  
A.Chentsova

Sample: AC5-434

Pulse Sequence: s2pul

Solvent: cdcl3

Temp. 26.0 C / 299.1 K

Operator: vnmr1

Mercury-300BB "jutta"

Relax. delay 1.000 sec

Pulse 45.0 degrees

Acq. time 1.301 sec

Width 18115.9 Hz

2000 repetitions

OBSERVE C13, 75.4555916 MHz

DECOUPLE H1, 300.0831467 MHz

Power 37 dB

continuously on

WALTZ-16 modulated

DATA PROCESSING

Line broadening 1.0 Hz

FT size 65536

Total time 1 hr, 24 min, 1 sec

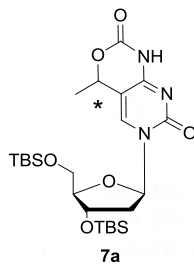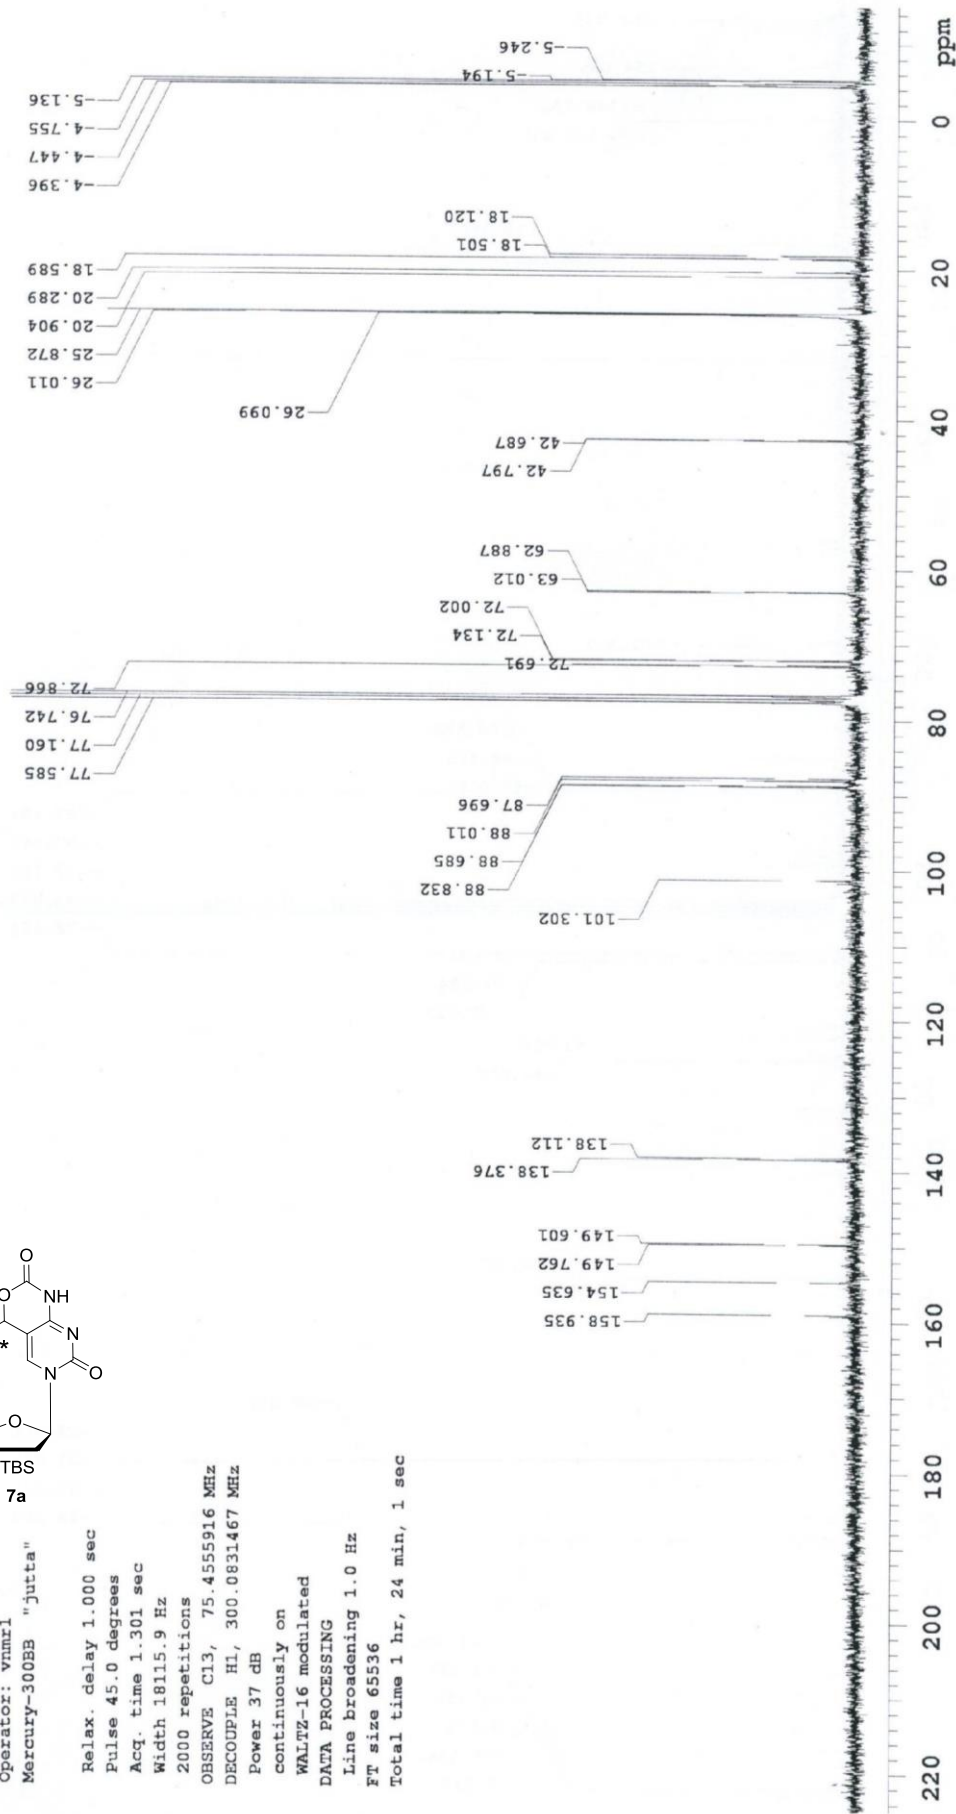

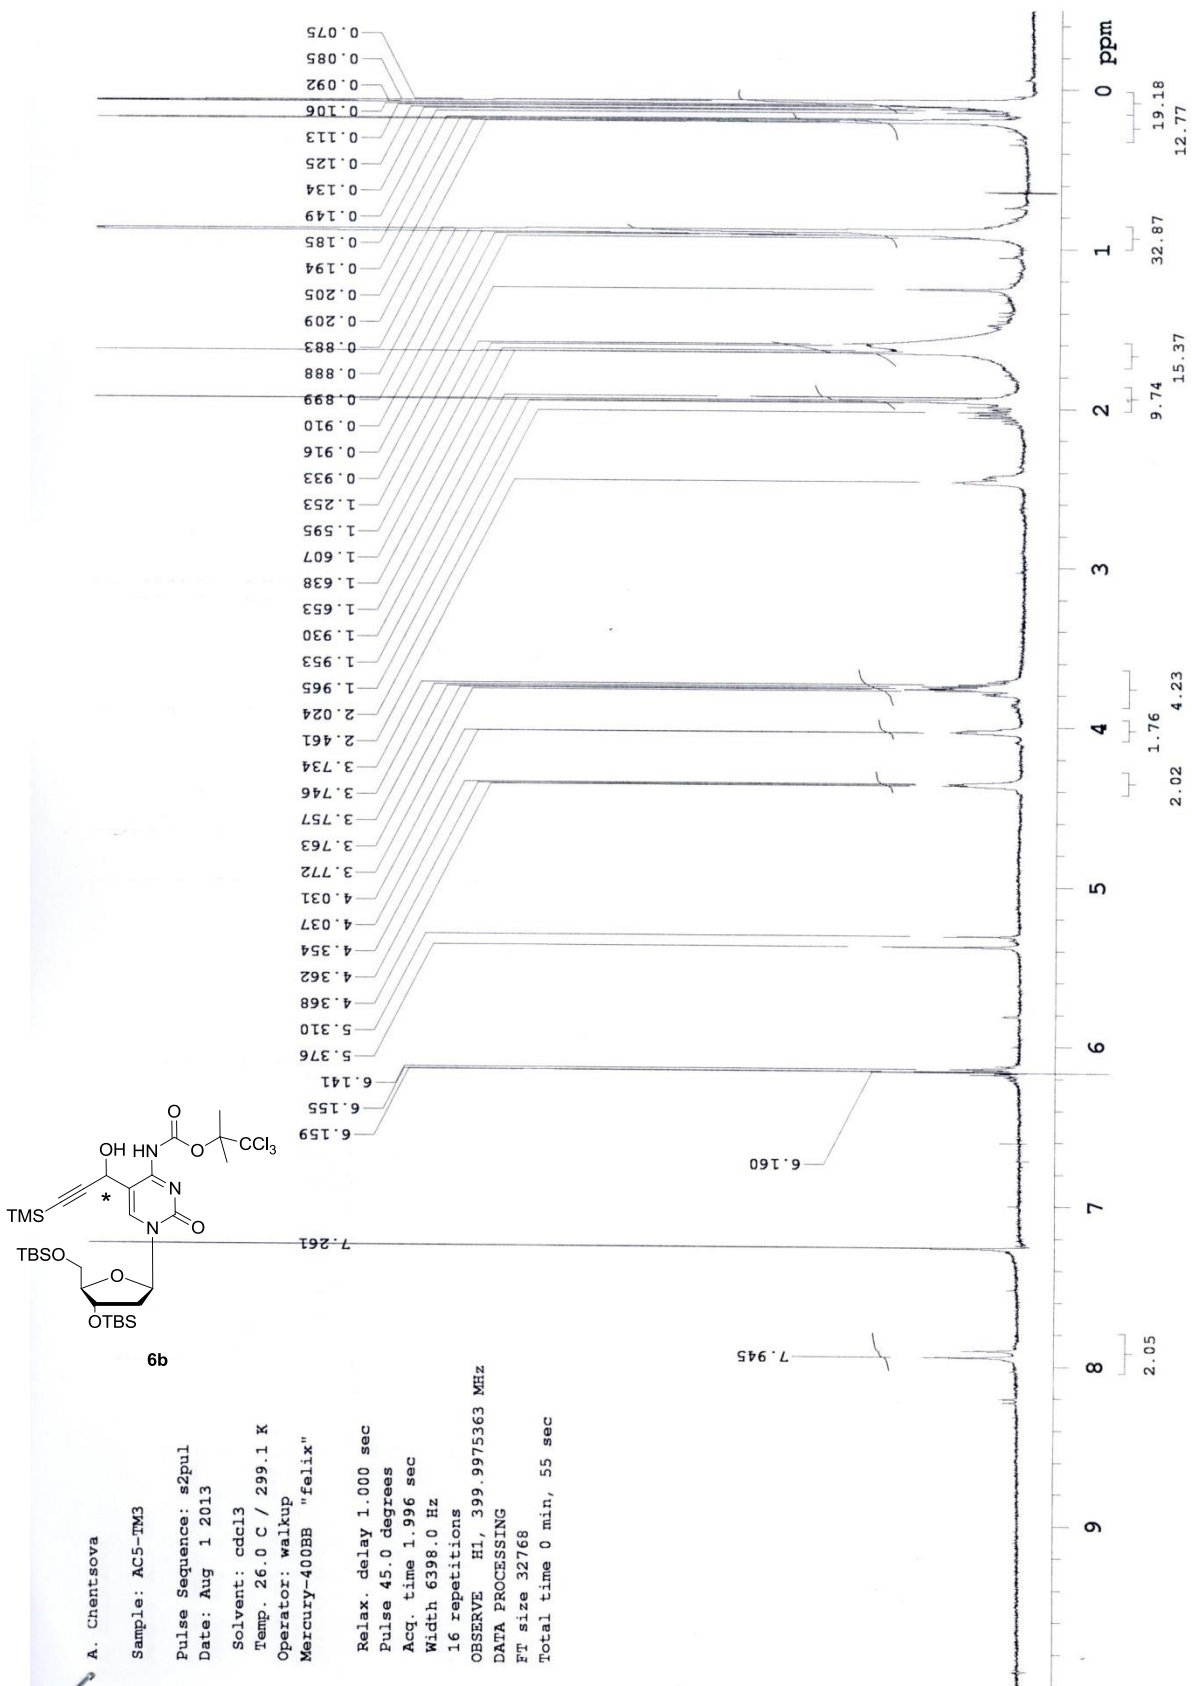

A. Chentsova

Sample: AC5-TM3

Pulse Sequence: s2pul

Date: Aug 1 2013

Solvent: cdcl3

Temp. 26.0 C / 299.1 K

Operator: walkup

Mercury-400BB "felix"

Relax. delay 1.000 sec

Pulse 45.0 degrees

Acq. time 1.996 sec

Width 6398.0 Hz

16 repetitions

OBSERVE H1, 399.9975363 MHz

DATA PROCESSING

FT size 32768

Total time 0 min, 55 sec



Chentsova

Sample: AC 5-26A

Pulse Sequence: APT

Date: Sep 6 2012

Solvent: cdcl3

Temp. 26.0 C / 299.1 K

Operator: walkup

Mercury-400BB "felix"

Relax. delay 1.000 sec

1st pulse 90.0 degrees

2nd pulse 135.0 degrees

Acq. time 1.000 sec

Width 24154.6 Hz

2784 repetitions

OBSERVE C13, 100.5794443 MHz

DECOUPLE H1, 399.9994929 MHz

Power 38 dB

on during acquisition

WALTZ-16 modulated

DATA PROCESSING

Waltz-16 processed

FT size 65536

Total time 3 hr, 7 min, 20 sec

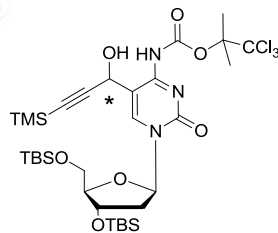

9b

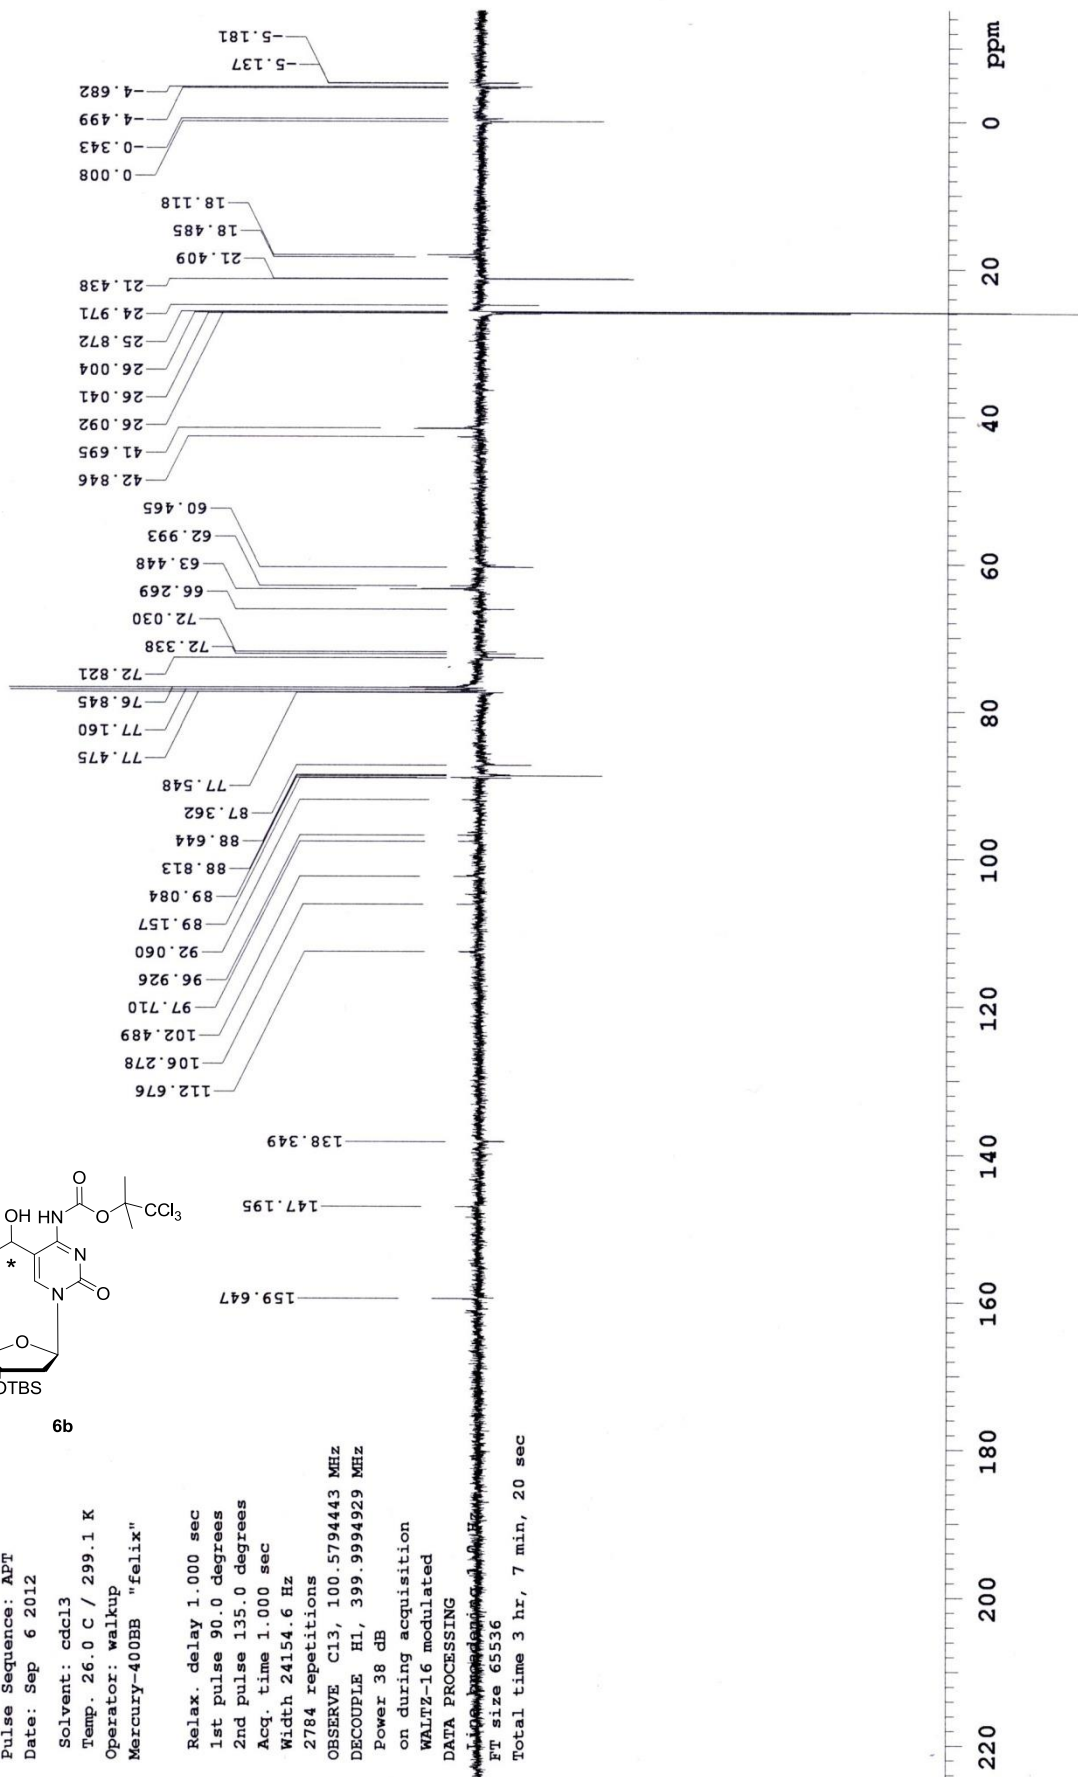

mentsova

Sample: AC5-Li3

Pulse Sequence: s2pul

Solvent: cdcl3

Temp. 26.0 C / 299.1 K

Operator: vnmr1

Mercury-300BB "jutta"

Relax. delay 1.000 sec

Pulse 29.7 degrees

Acq. time 1.998 sec

Width 4800.8 Hz

24 repetitions

OBSERVE H1, 300.0816984 MHz

DATA PROCESSING

Line broadening 0.2 Hz

FT size 32768

Total time 3 min, 35 sec

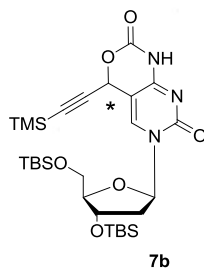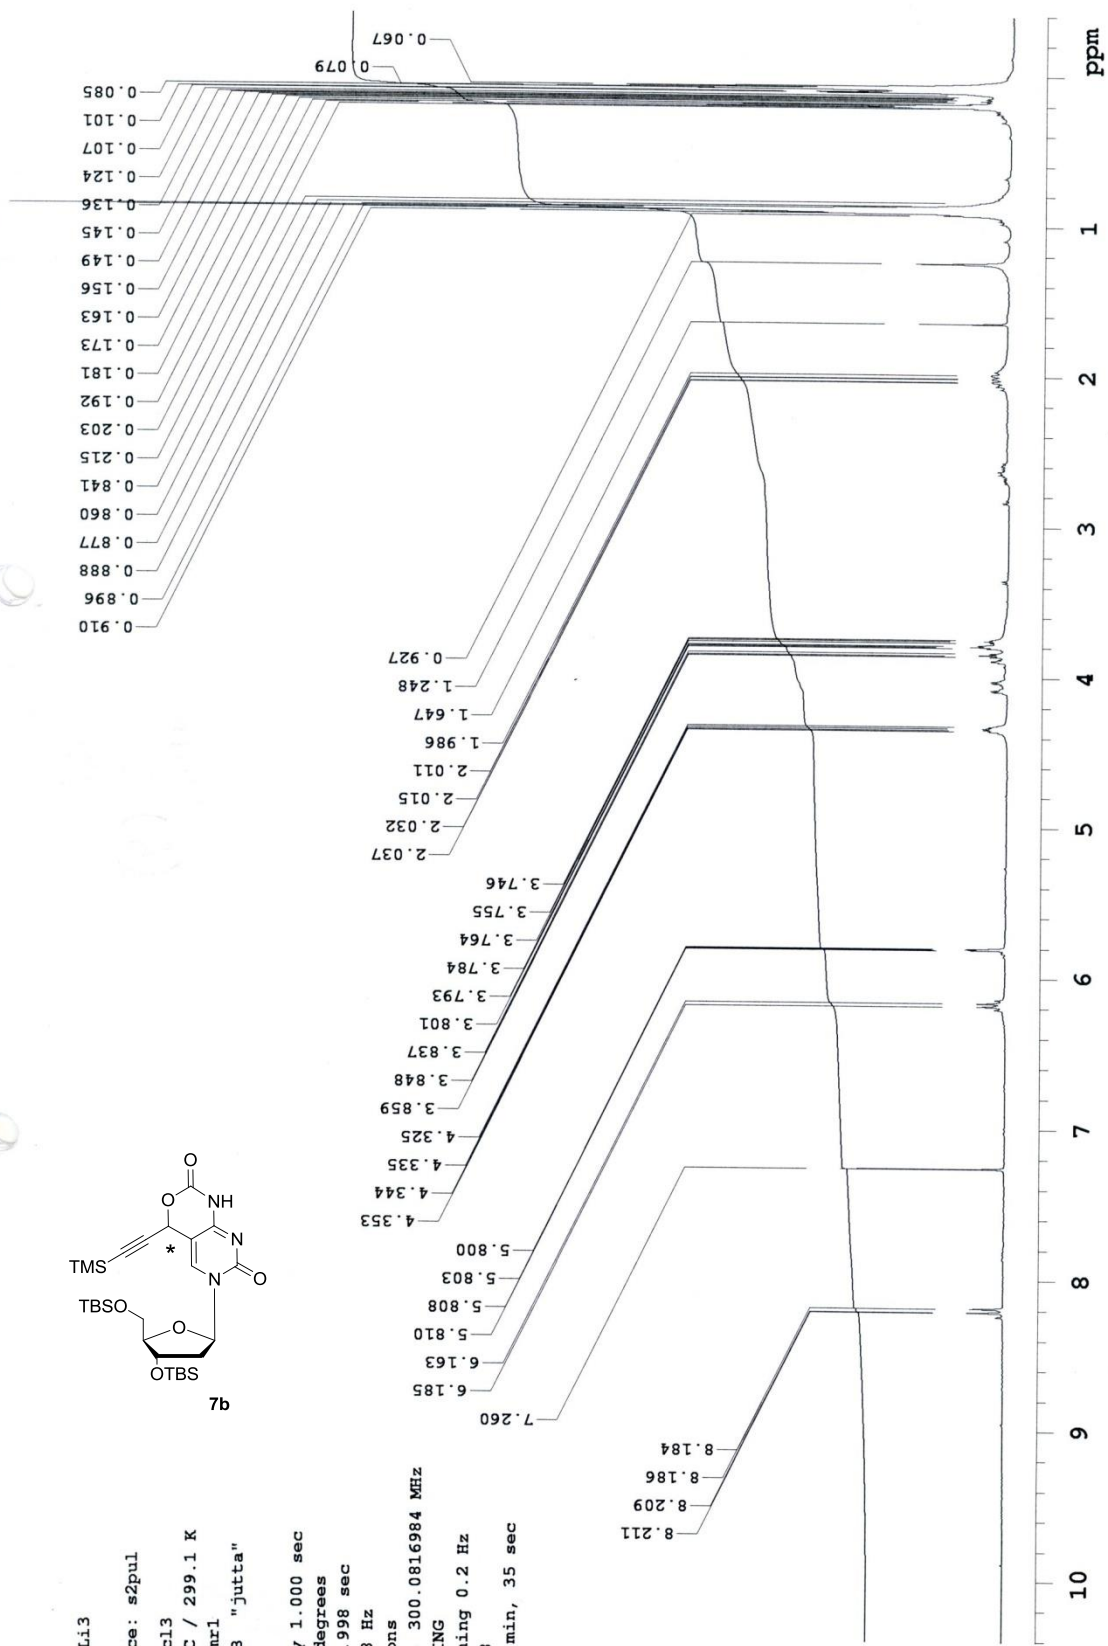

Std Carbon experiment

Sample: AC5-L3

Pulse Sequence: s2pul

Solvent: cdcl3  
Temp. 26.0 C / 299.1 K  
Operator: vnmr1  
Mercury-300BB "jutta"

Relax. delay 1.000 sec  
Pulse 45.0 degrees  
Acq. time 1.301 sec  
Width 18115.9 Hz  
8000 repetitions

OBSERVE C13, 75.4555916 MHz  
DECOUPLE H1, 300.0831467 MHz  
Power 37 dB  
continuously on  
WALTZ-16 modulated

DATA PROCESSING  
Line broadening 1.0 Hz  
FT size 65536  
Total time 5 hr, 23 min, 28 sec

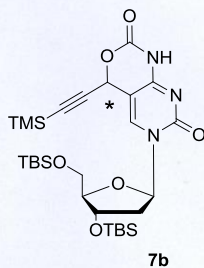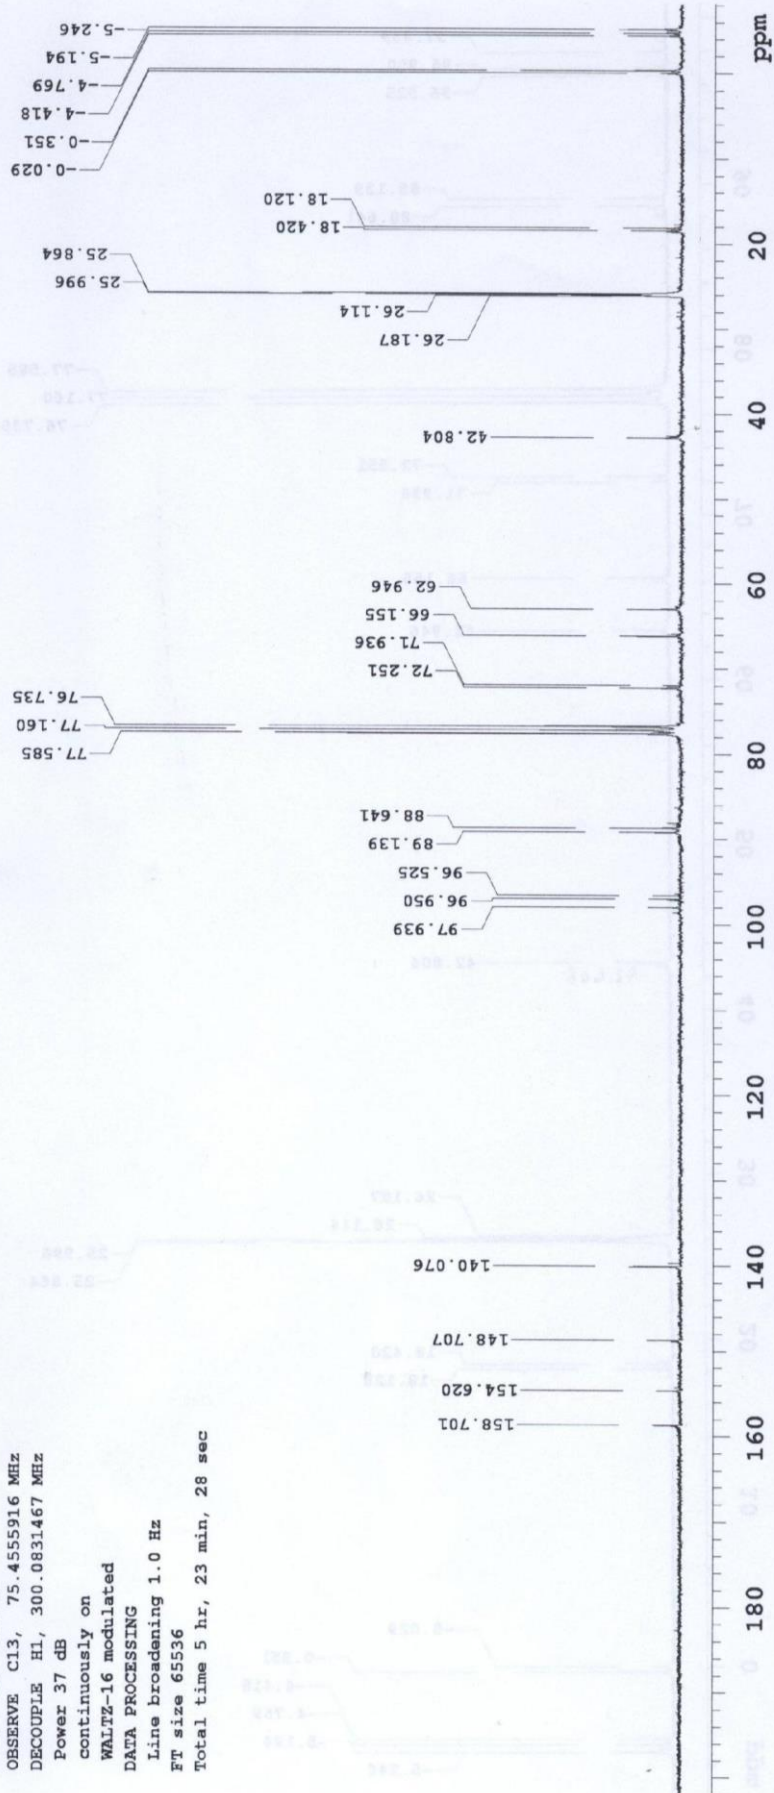

Sample: AC 5-42/2

```
Pulse Sequence: s2pul
Solvent: cdcl3
Temp. 26.0 C / 299.1
Operator: vnmr1
Mercury-300BB "jutta"
```

Relax. delay 1.000 sec  
Pulse 29.7 degrees  
Acq. time 1.998 sec  
Width 4800.8 Hz  
16 repetitions

OBSERVE H1, 300.0816984 MHz  
DATA PROCESSING  
Line<sub>0</sub> broadening 0.2 Hz  
FT size 32768  
Total time 28 min 47 sec  
7.45199  
7.37327

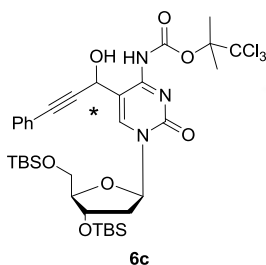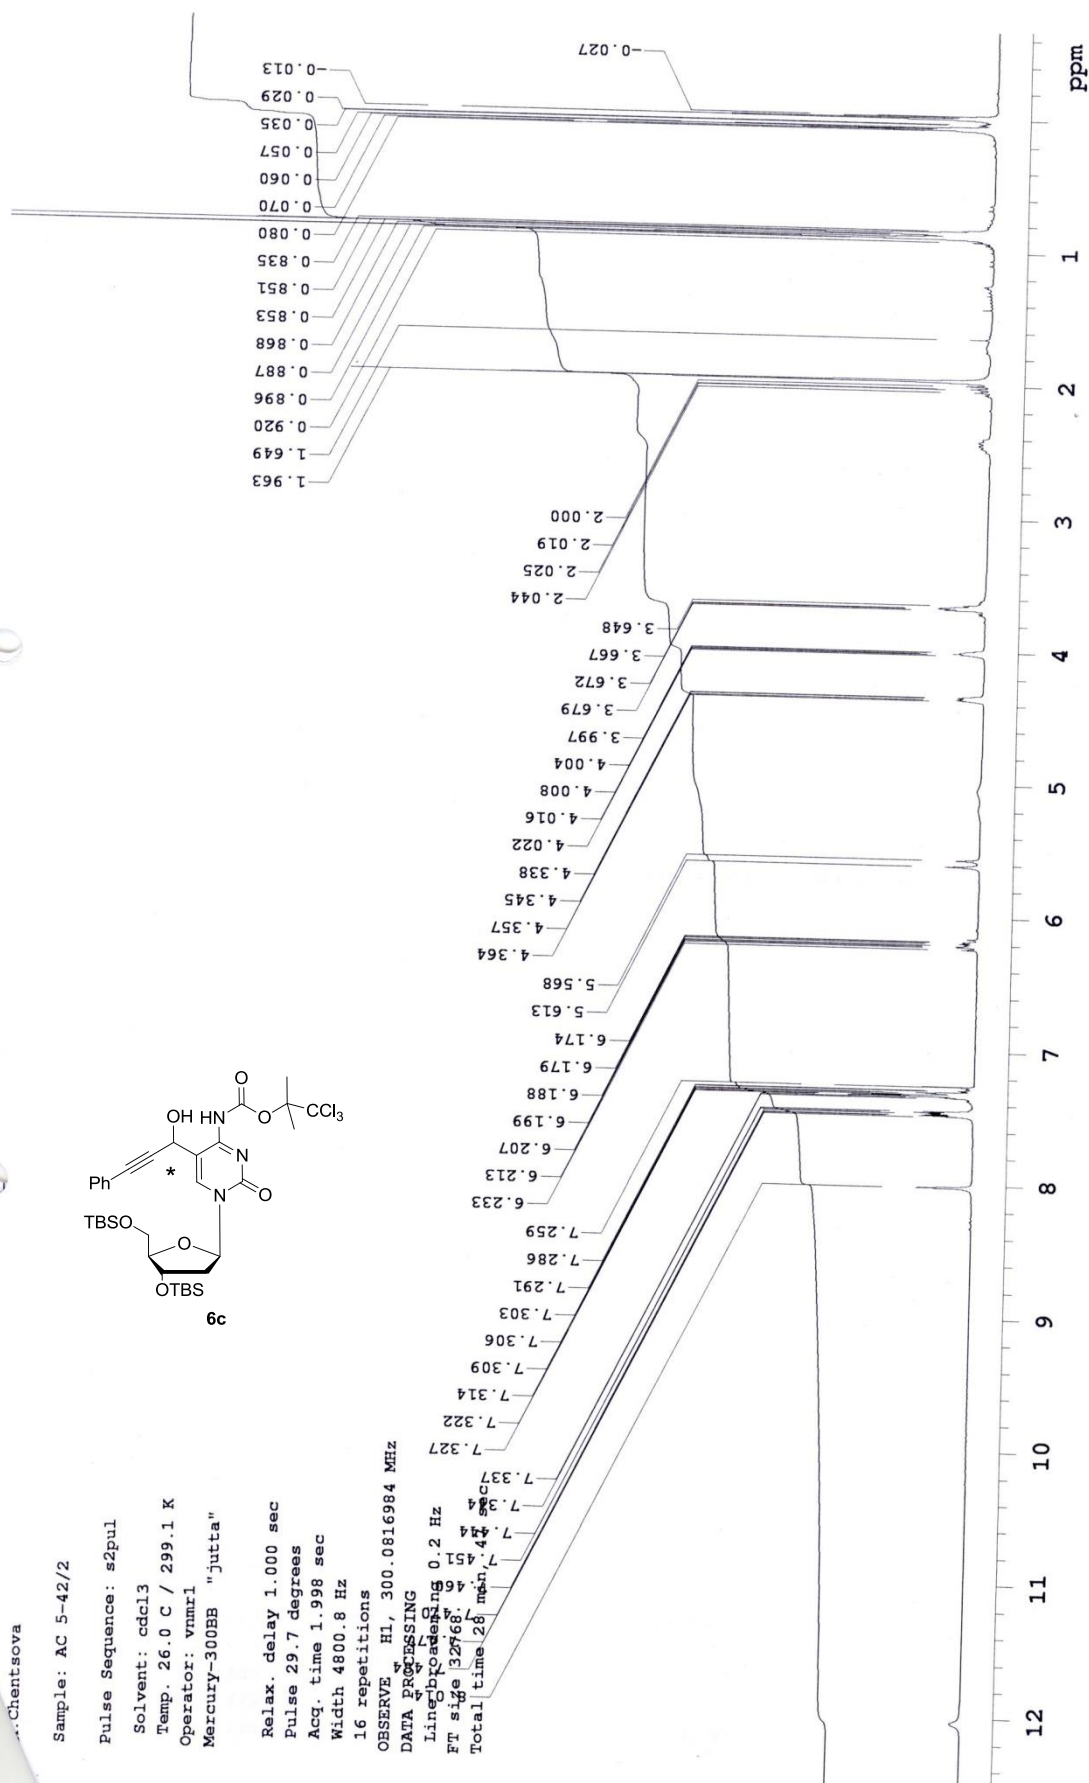





Sample: AC5-424A

Pulse Sequence: s2pul

Solvent: cdcl3

Temp. 26.0 C / 299.1 K

Operator: vnmr1

Mercury-300BB "jutta"

Relax. delay 1.000 sec

Pulse 29.7 degrees

Acq. time 1.998 sec

Width 4800.8 Hz

16 repetitions

OBSERVE H1, 300.0816981 MHZ

DATA PROCESSING

Line broadening 0.2 Hz

FT size 32768

Total time 1 min, 47 sec

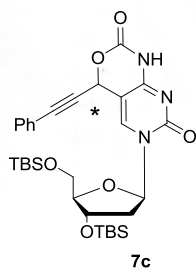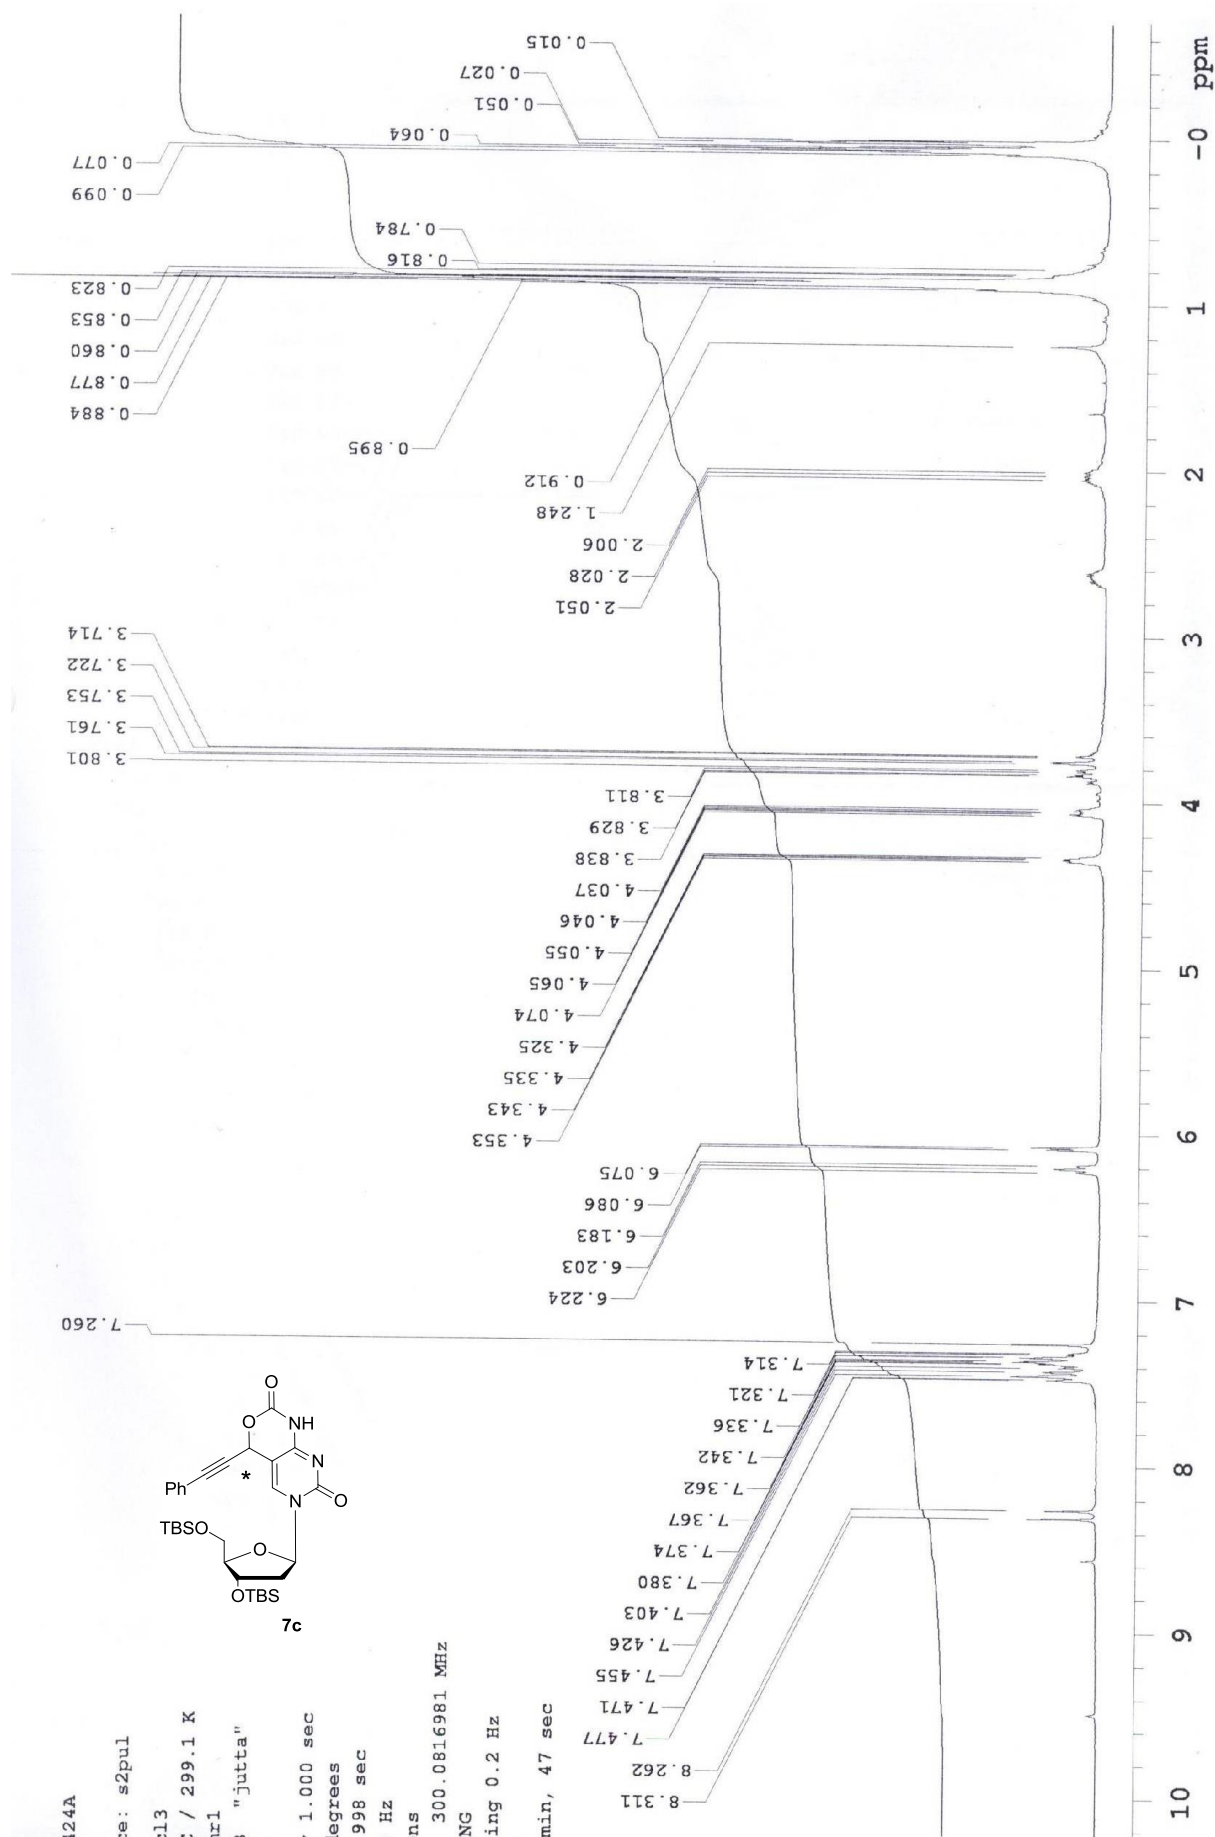

A. Chenitsova

Sample: AC5-424A

Pulse Sequence: s2pul

Date: Apr 9 2013

Solvent: cdcl3

Temp. 26.0 C / 299.1 K

Operator: walkup

Mercury-400BB "felix"

Relax. delay 1.000 sec

Pulse 45.0 degrees

Acq. time 1.300 sec

Width 24154.6 Hz

912 repetitions

OBSERVE C13, 100.5794466 MHz

DECOUPLE H1, 399.9994929 MHz

Power 38 dB

continuously on

WALTZ-16 modulated

DATA PROCESSING

Line broadening 0.5 Hz

FT size 65536

Total time 42 min, 58 sec

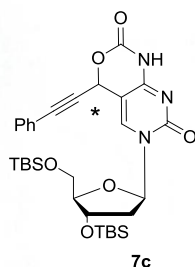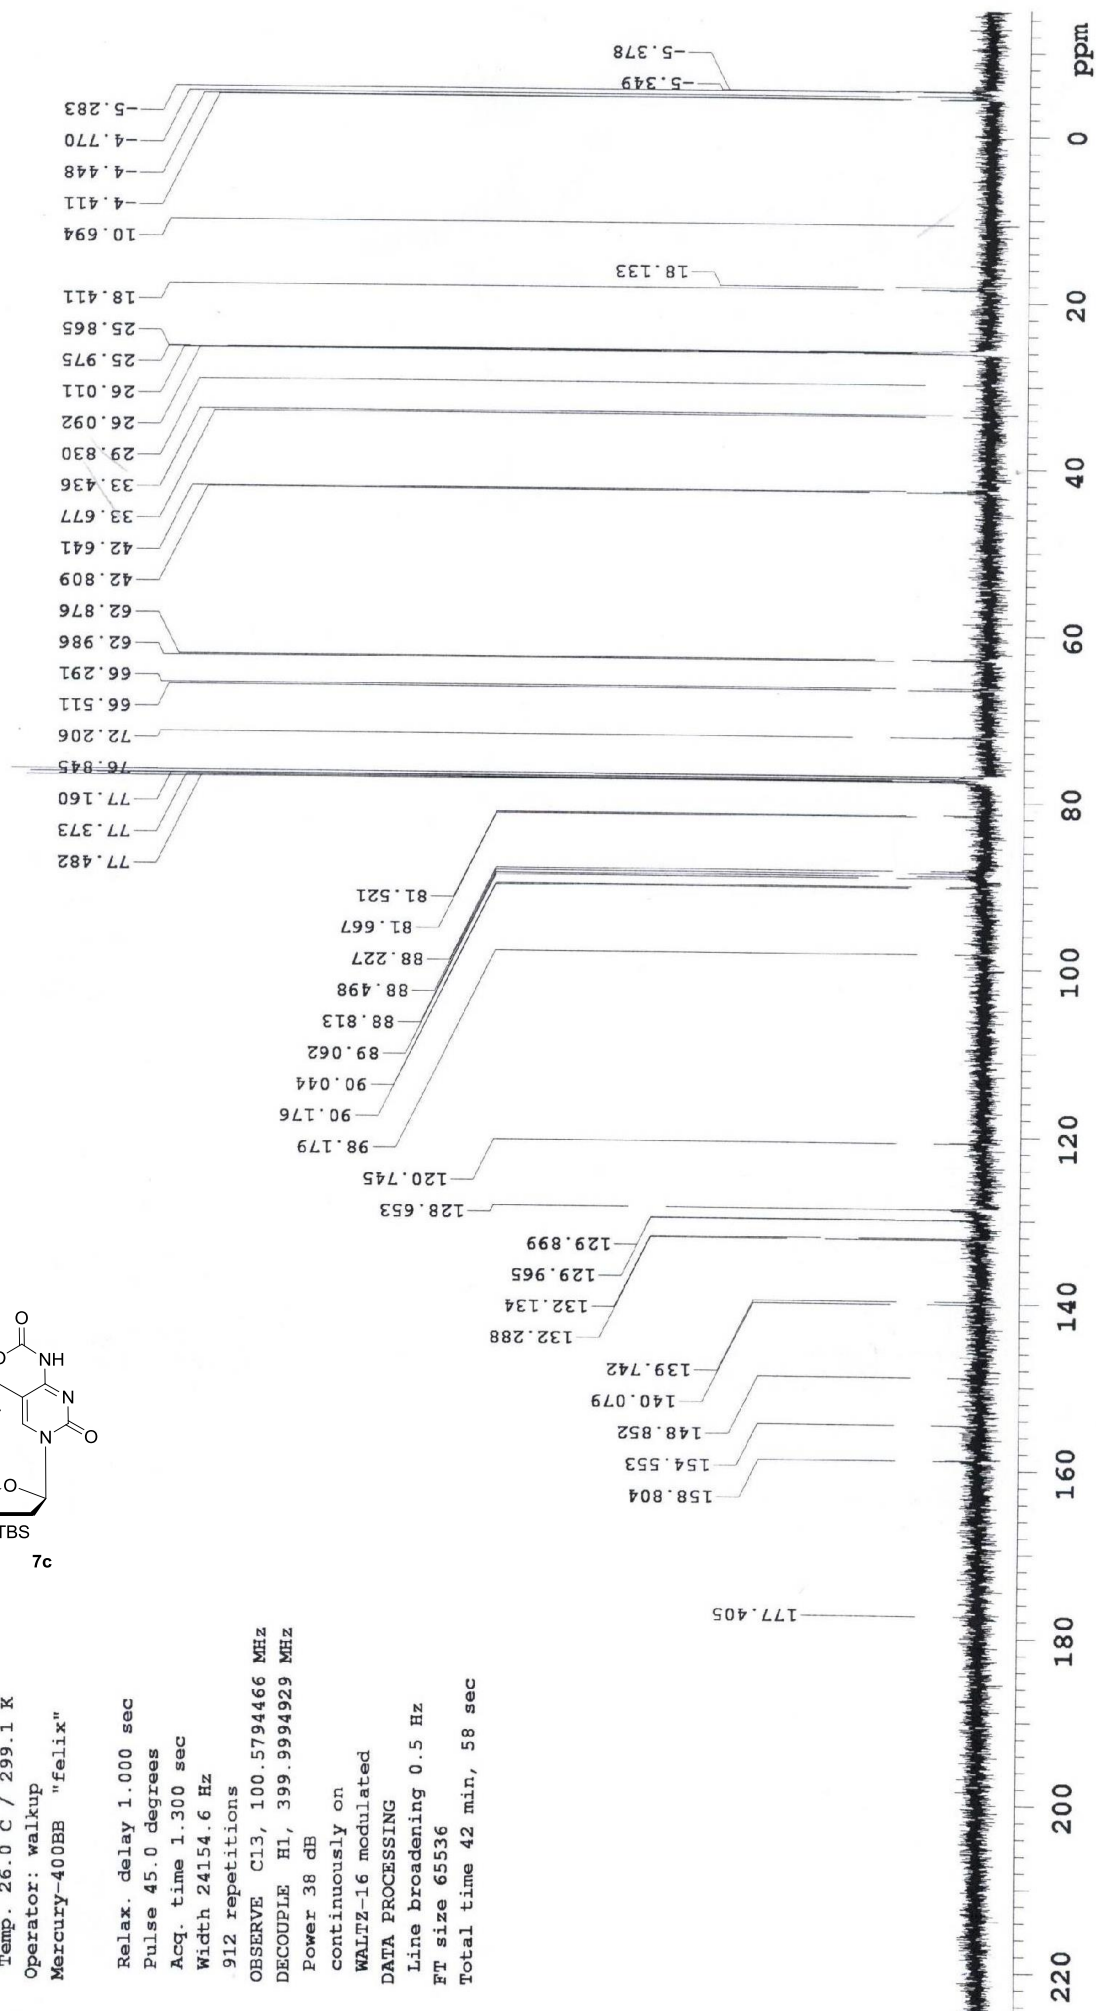

E. Kapourani

Sample: EK-21LSC

Pulse Sequence: s2pul

Date: Aug 22 2012

Solvent: dmsc

Temp. 26.0 C / 299.1 K

Operator: walkup

Mercury-400BB "felix"

Relax. delay 1.000 sec

Pulse 29.7 degrees

Acq. time 1.996 sec

Width 6398.0 Hz

32 repetitions

OBSERVE H1, 399.9994309 MHz

DATA PROCESSING

Line broadening 0.2 Hz

FT size 32768

Total time 1 min, 50 sec

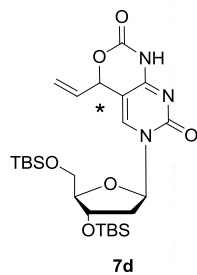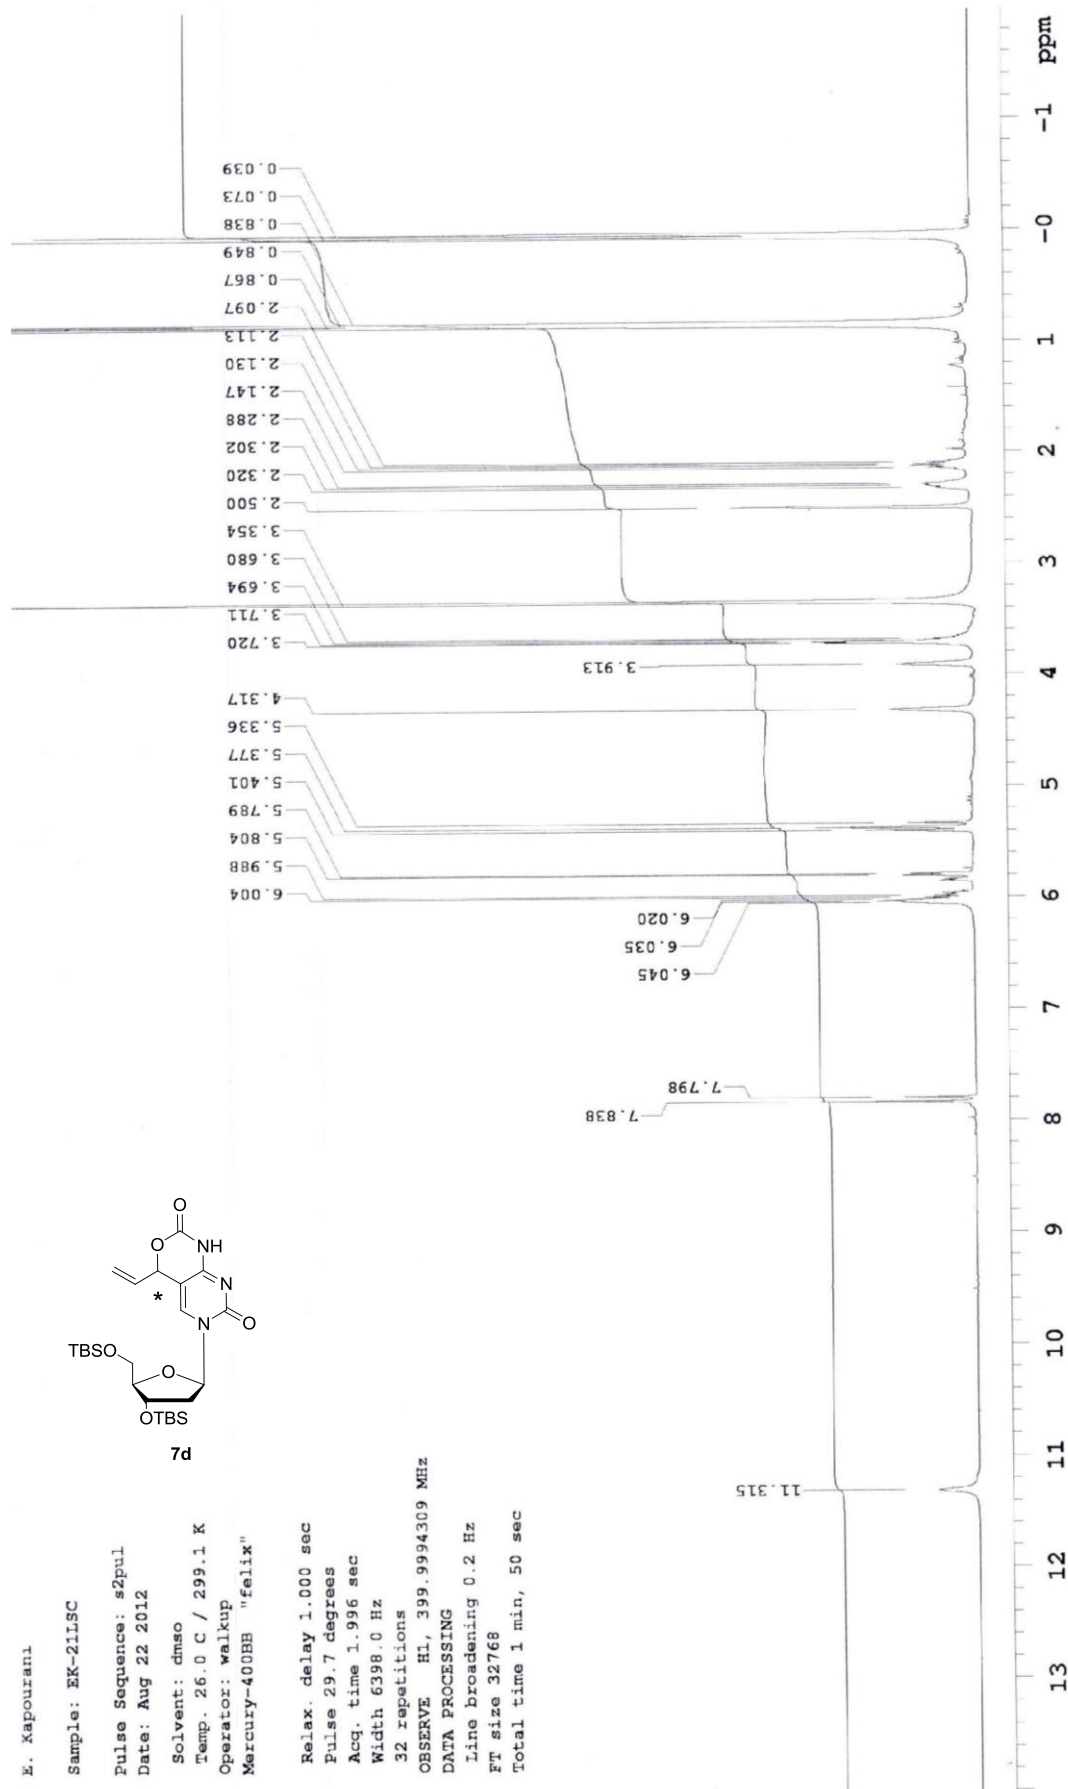



E. Kapourani

Sample: EK-21LSC

Pulse Sequence: s2pul

Date: Aug 22 2012

Solvent: dmsc

Temp. 26.0 C / 299.1 K

Operator: walkup

Mercury-400BB "felix"

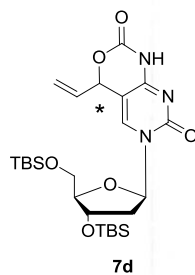

Relax. delay 1.000 sec

Pulse 45.0 degrees

Acq. time 1.300 sec

Width 24154.6 Hz

10000 repetitions

OBSERVE C13, 100.5799830 MHz

DECOUPLE H1, 400.0013929 MHz

Power 38 dB

continuously on

WALTZ-16 modulated

DATA PROCESSING

Line broadening 1.0 Hz

FT size 65536

Total time 6 hr, 49 min, 3 sec

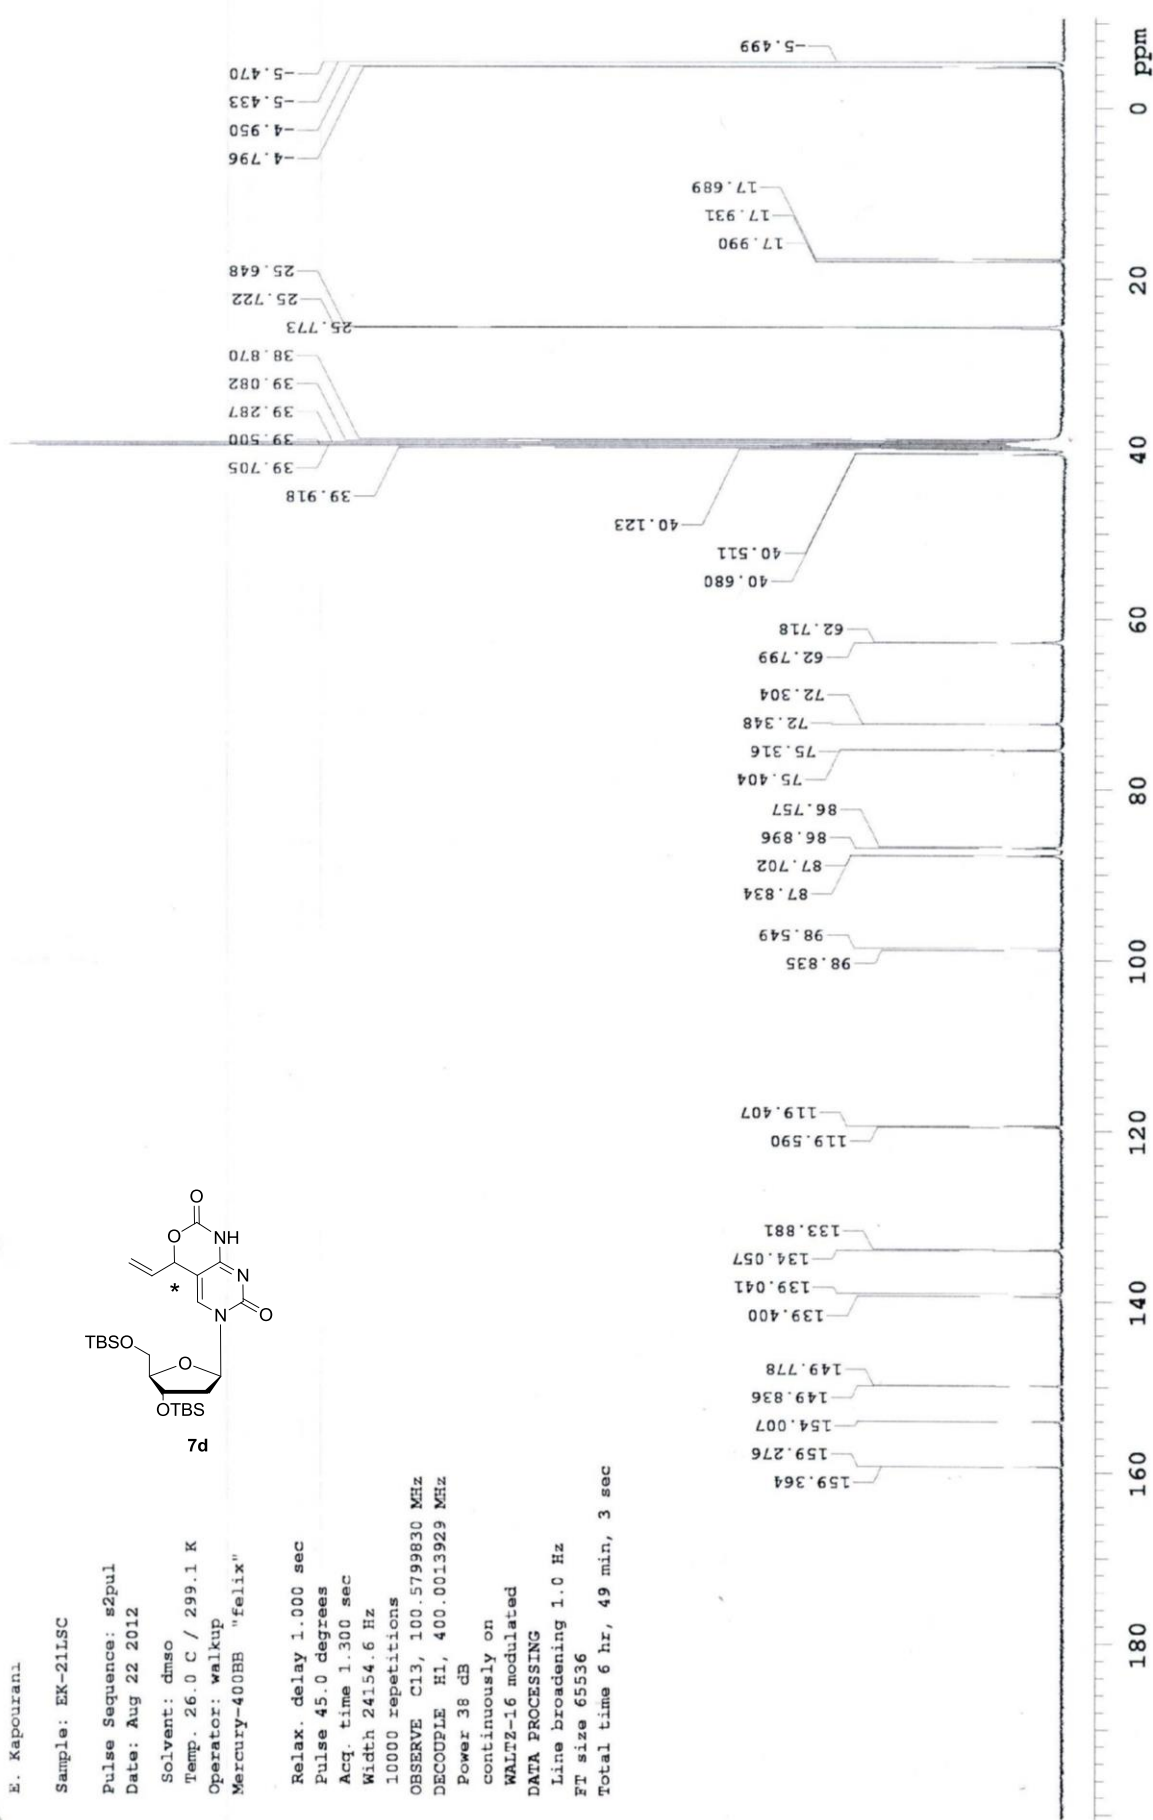

Total time 1 min, 47 sec

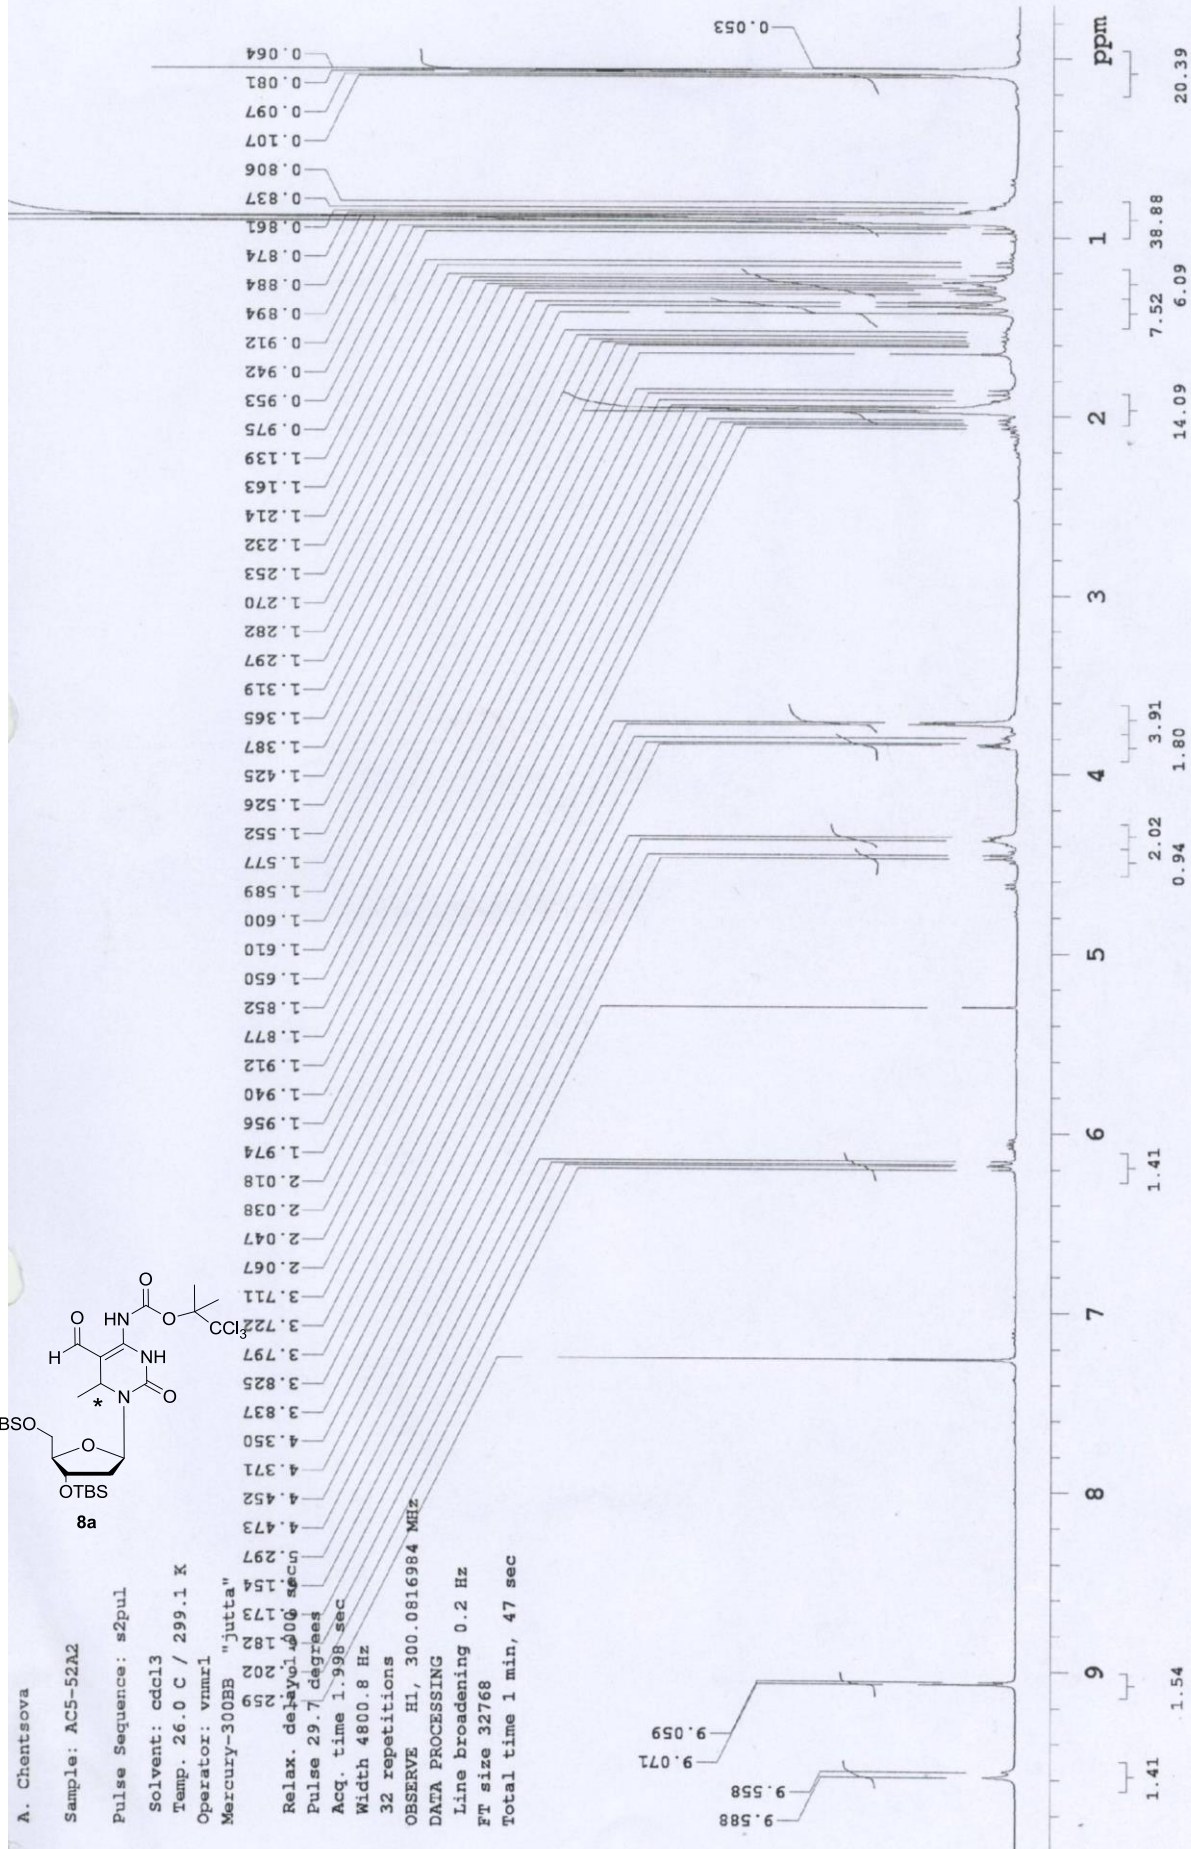

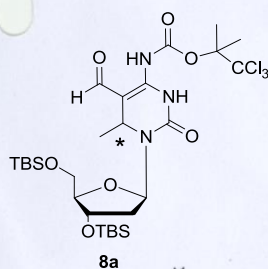

8a

A. Chentsova

Sample: AC5-52A2

Pulse Sequence: s2pul

Solvent: cdcl3

Temp. 26.0 C / 299.1 K

Operator: vnmr1

Mercury-300BB "jutta"

Relax. delay 1.000 sec

Pulse 45.0 degrees

Acq. time 1.301 sec

Width 18115.9 Hz

20000 repetitions

OBSERVE C13, 75.4555905 MHz

DECOUPLE H1, 300.0831467 MHz

Power 37 dB

continuously on

WALTZ-16 modulated

DATA PROCESSING

Line broadening 0.5 Hz

FT size 65536

Total time 14 hr, 14 sec

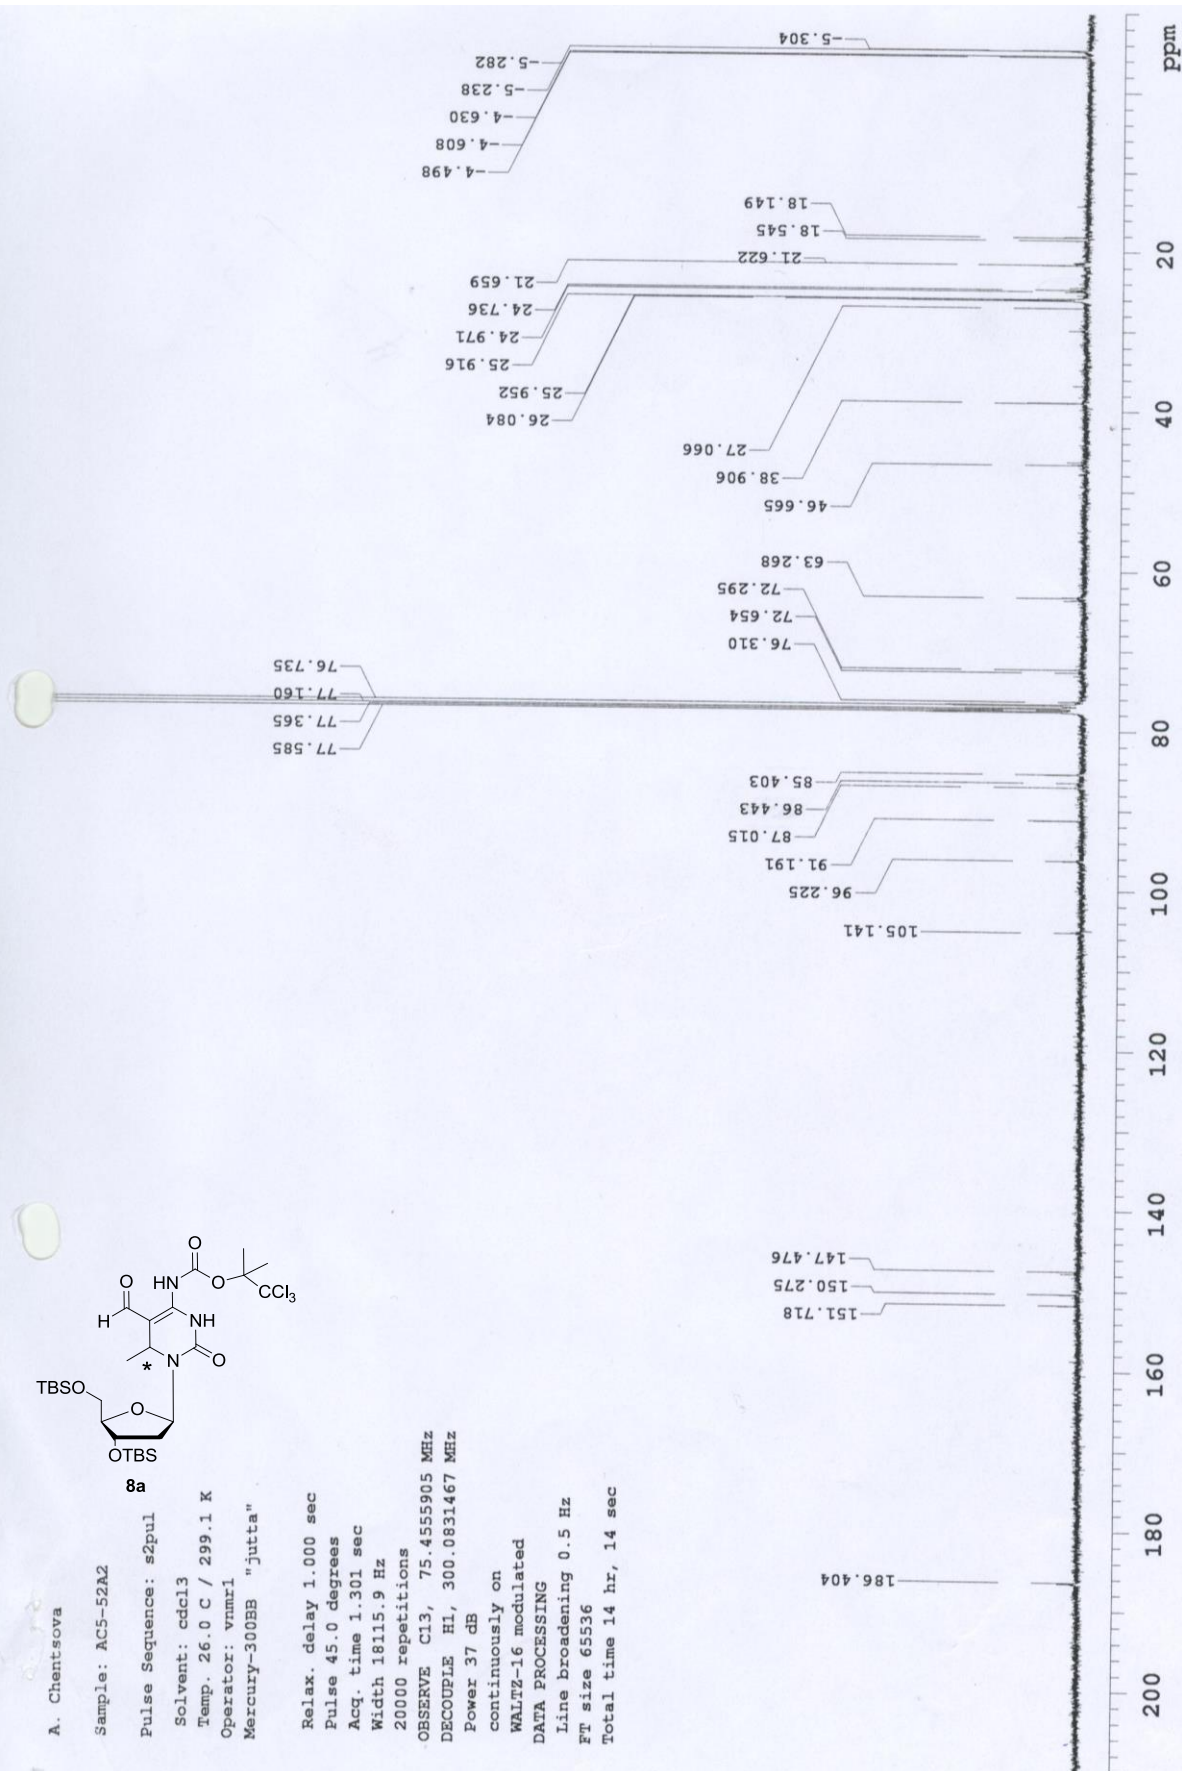



A. Chentsova

Sample: AC5-501

Pulse Sequence: s2pul

Date: Dec 19 2012

Solvent: cdcl3

Temp. 26.0 C / 299.1 K

Operator: walkup

Mercury-400BB "felix"

Relax. delay 1.000 sec

Pulse 29.7 degrees

Acq. time 1.996 sec

Width 6398.0 Hz

32 repetitions

OBSERVE H1, 399.9975363 MHz

DATA PROCESSING

Line broadening 0.2 Hz

FT size 32768

Total time 1 min, 50 sec

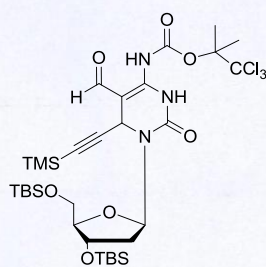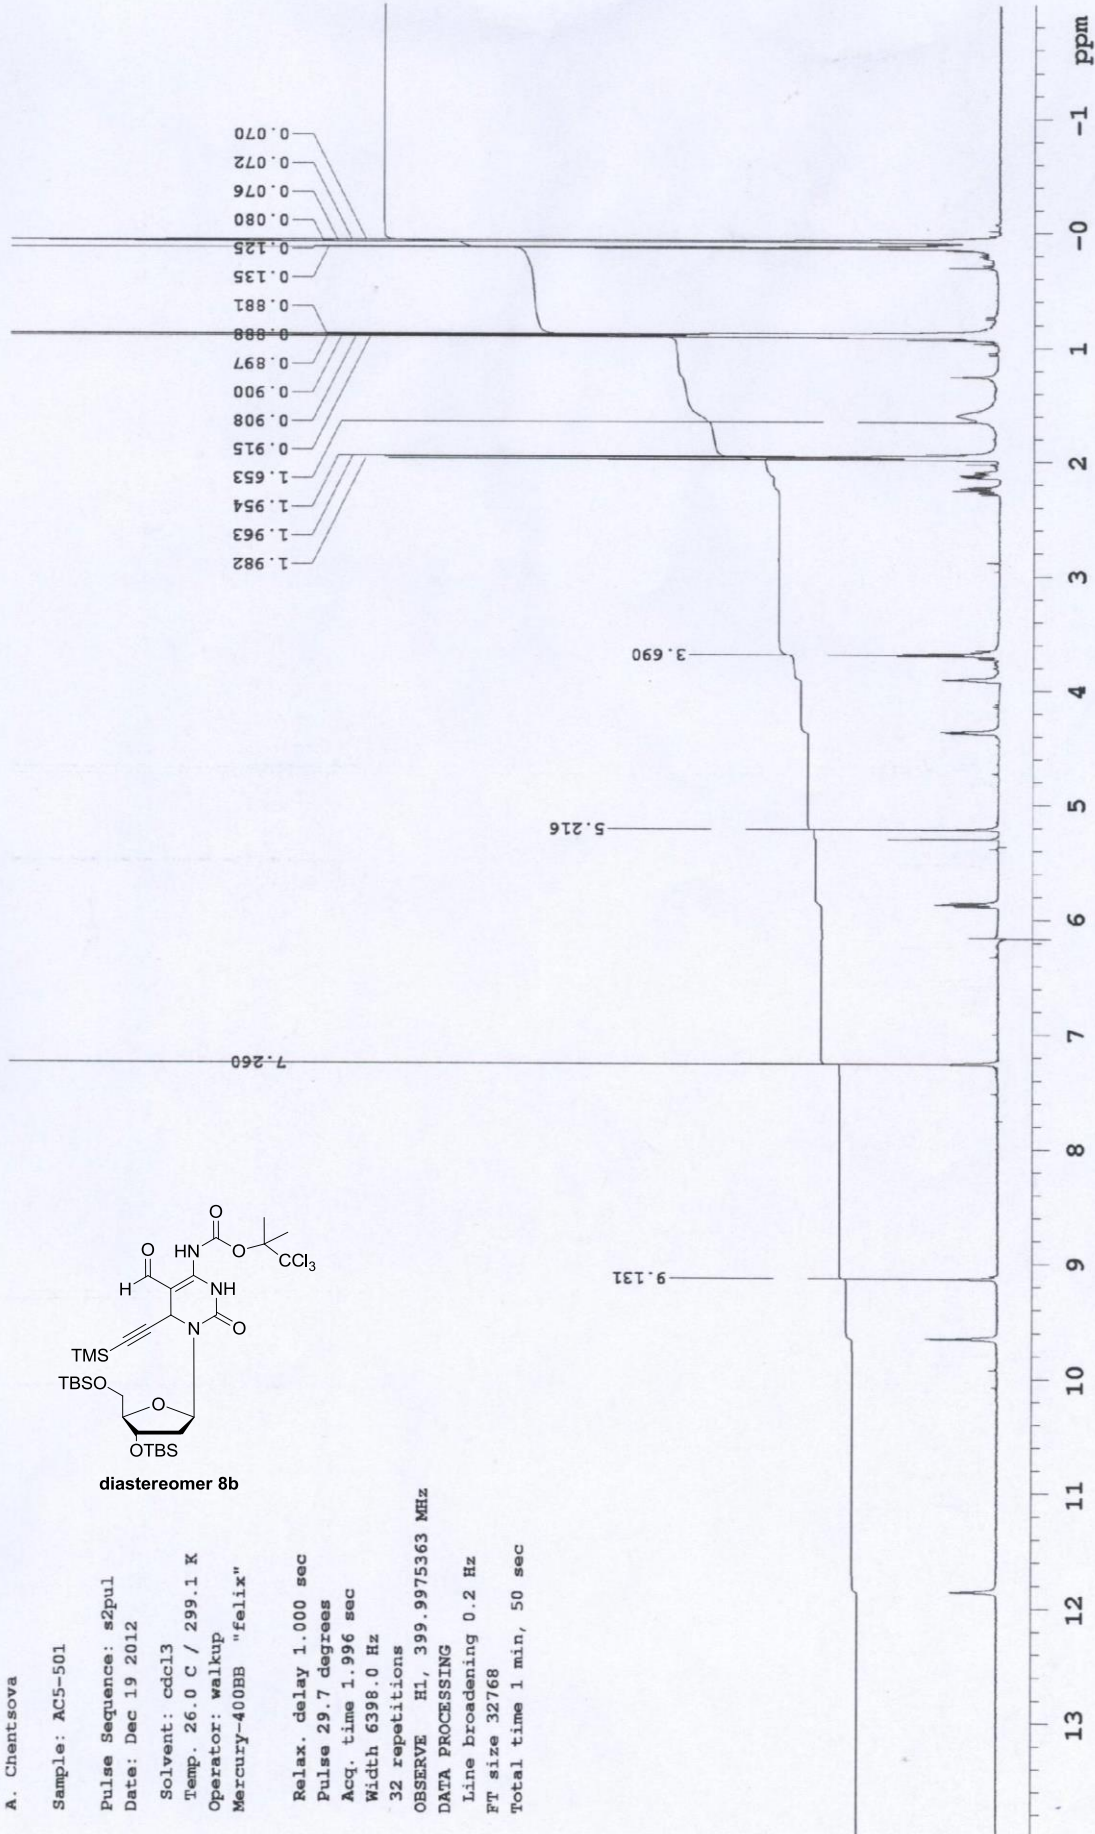

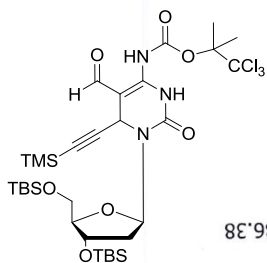

diastereomer 8b

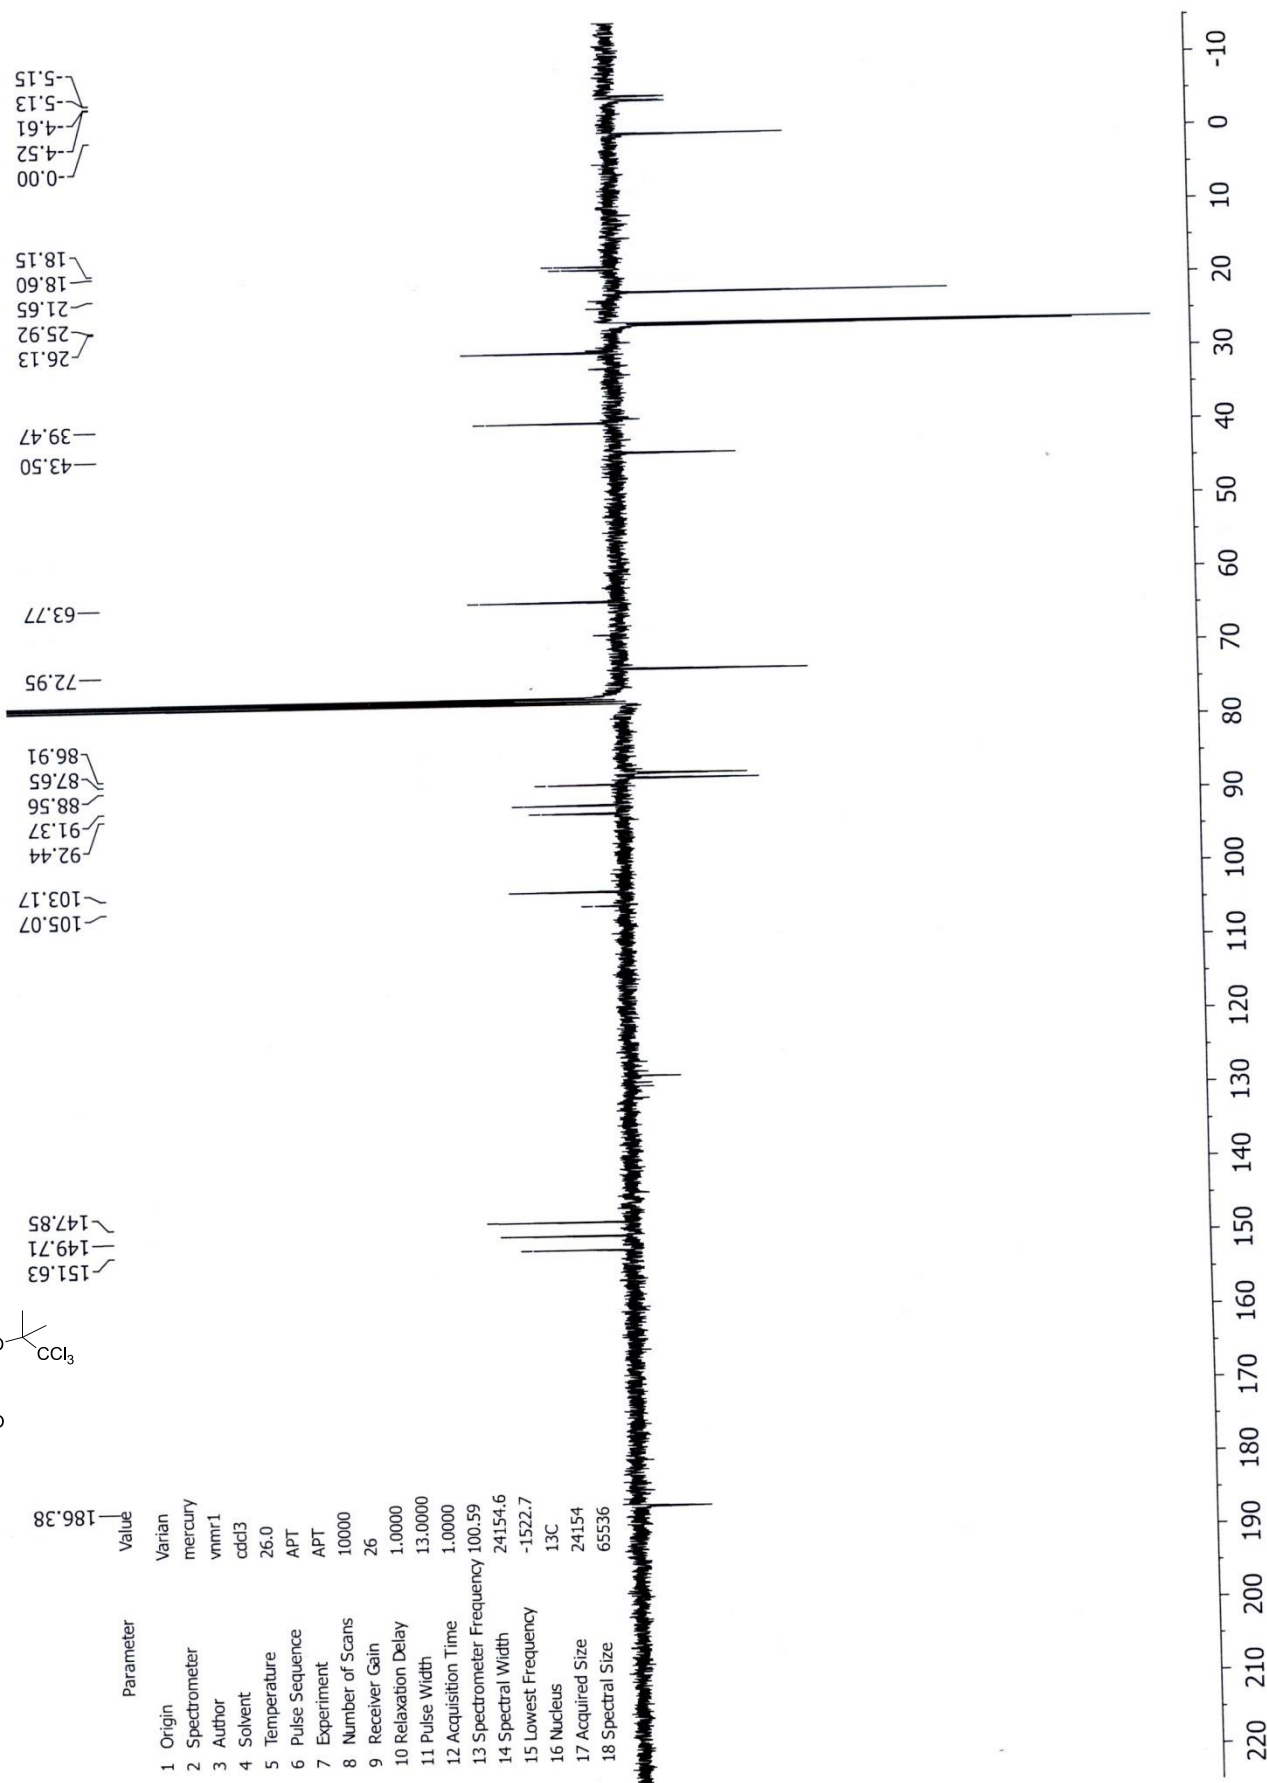



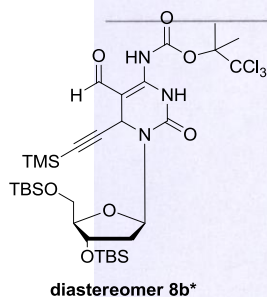

diastereomer 8b\*

A. Chentsova

Sample: AC5-502

Pulse Sequence: s2pul

Date: Dec 17 2012

Solvent: cdcl3

Temp. 26.0 C / 299.1 K

Operator: walkup

Mercury-400BB

99.613 MHz

Relax. delay 1.000 sec

Pulse 29.7 degrees

Acq. time 1.996 sec

Width 6398.0 Hz

32 repetitions

OBSERVE H1, 399.9975360 MHz

DATA PROCESSING

Line broadening 0.2 Hz

FT size 32768

Total time 1 min, 50 sec

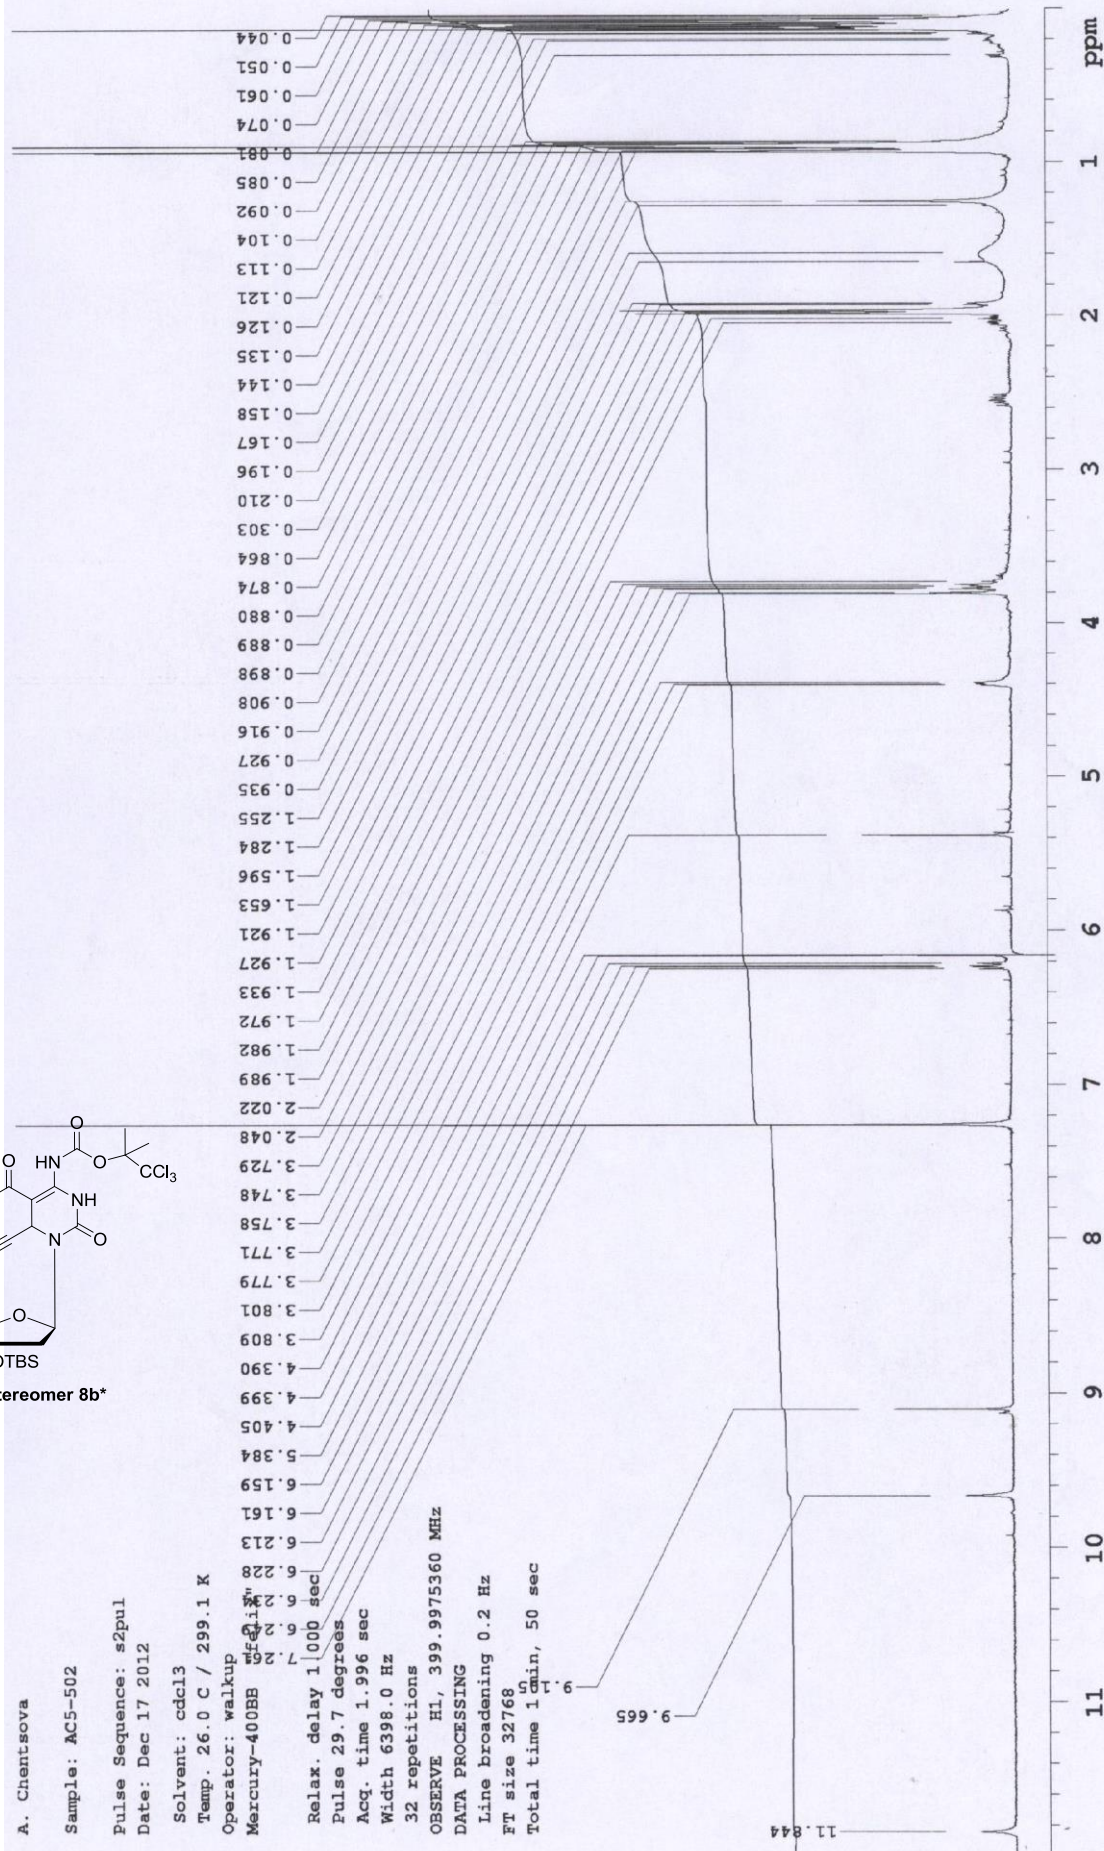

exp3 Carbon

| SAMPLE      |             |            |          | SPECIAL |        |  |  |
|-------------|-------------|------------|----------|---------|--------|--|--|
| date        | Dec 17 2012 | temp       | 26.0     |         |        |  |  |
| solvent     | cdcl3       | gain       | 20       |         |        |  |  |
| file        | exp         | spin       | 20       |         |        |  |  |
| ACQUISITION |             |            |          | hst     | 0.008  |  |  |
| sw          | 24154.6     | pw90       | 13.000   |         |        |  |  |
| at          | 1.300       | alfa       | 10.000   |         |        |  |  |
| np          | 62826       | FLAGS      |          |         |        |  |  |
| fb          | 13400       | il         | n        |         |        |  |  |
|             |             | in         | n        |         |        |  |  |
| bs          | 32          | in         | n        |         |        |  |  |
| dl          | 1.000       | dp         | y        |         |        |  |  |
| nt          | 20000       | hs         | nn       |         |        |  |  |
| ct          | 20000       | PROCESSING |          |         |        |  |  |
| TRANSMITTER |             |            |          | lb      | 1.00   |  |  |
| tn          | C13         | fn         | not used |         |        |  |  |
| stsq        | 100.590     | DISPLAY    |          |         |        |  |  |
| tof         | 1054.2      | sp         | -1522.8  |         |        |  |  |
| tpwr        | 59          | wp         | 24153.9  |         |        |  |  |
| ppw         | 6.500       | rfl        | 9284.3   |         |        |  |  |
| DECOUPLER   |             |            |          | rfl     | 7760.7 |  |  |
| dn          | H1          | rp         | 85.6     |         |        |  |  |
| dof         | 0           | lp         | -149.0   |         |        |  |  |
| dm          | yyy         | PLOT       |          |         |        |  |  |
| dnn         | w           | wc         | 250      |         |        |  |  |
| dppwr       | 38          | sc         | 0        |         |        |  |  |
| dmf         | 9100        | vs         | 5522     |         |        |  |  |
|             |             | th         | 3        |         |        |  |  |
|             |             | ai         | cdc      |         |        |  |  |
|             |             | ph         |          |         |        |  |  |

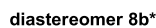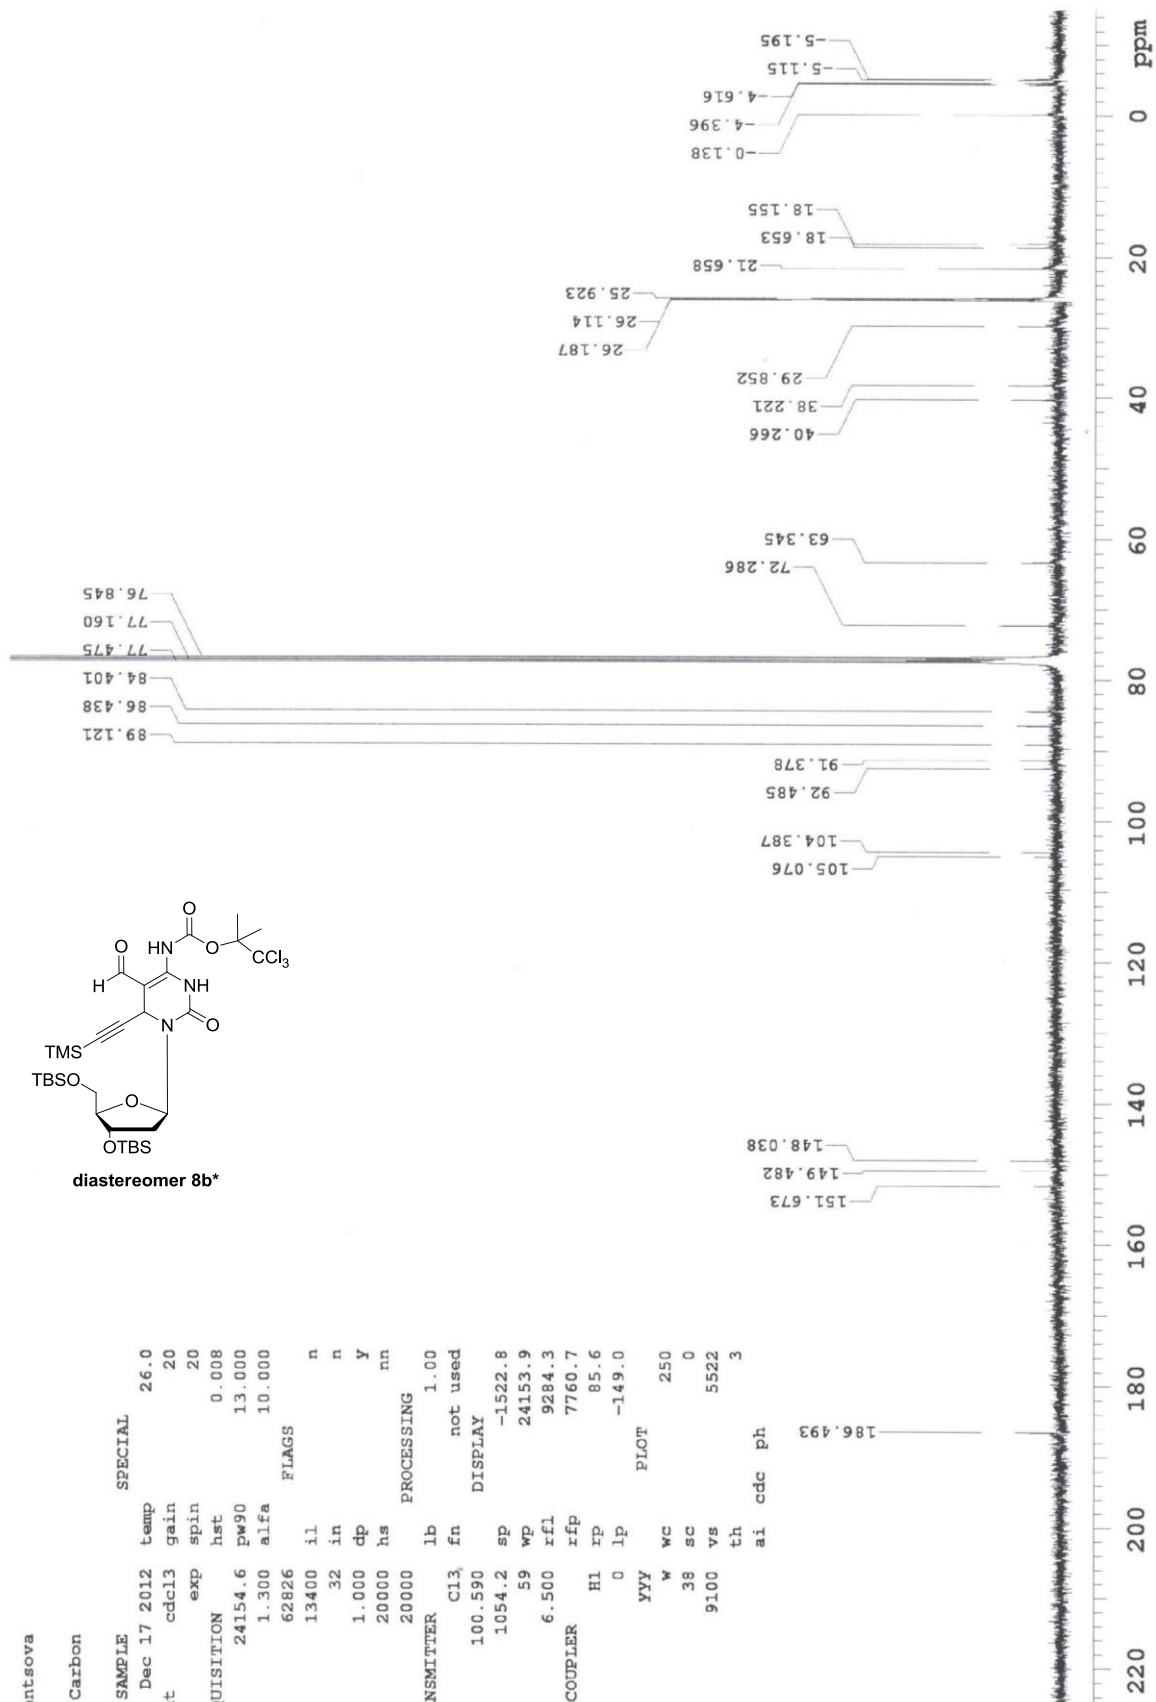

Sample: ACS-51A3

Pulse Sequence: s2pul

Solvent: cdcl3

Temp. 26.0 C / 299.1 K

Operator: vnmr1

Mercury-300BB "jutta"

Relax. delay 1.000 sec

Pulse 29.7 degrees

Acq. time 1.998 sec

Width 4800.8 Hz

24 repetitions

OBSERVE H1, 300.0816988 MHz

DATA PROCESSING

Line broadening 0.2 Hz

FT size 32768

Total time 6.246 sec

7.237 sec

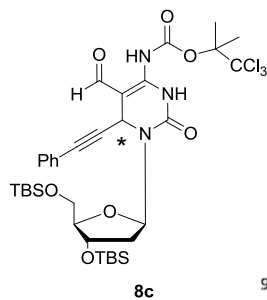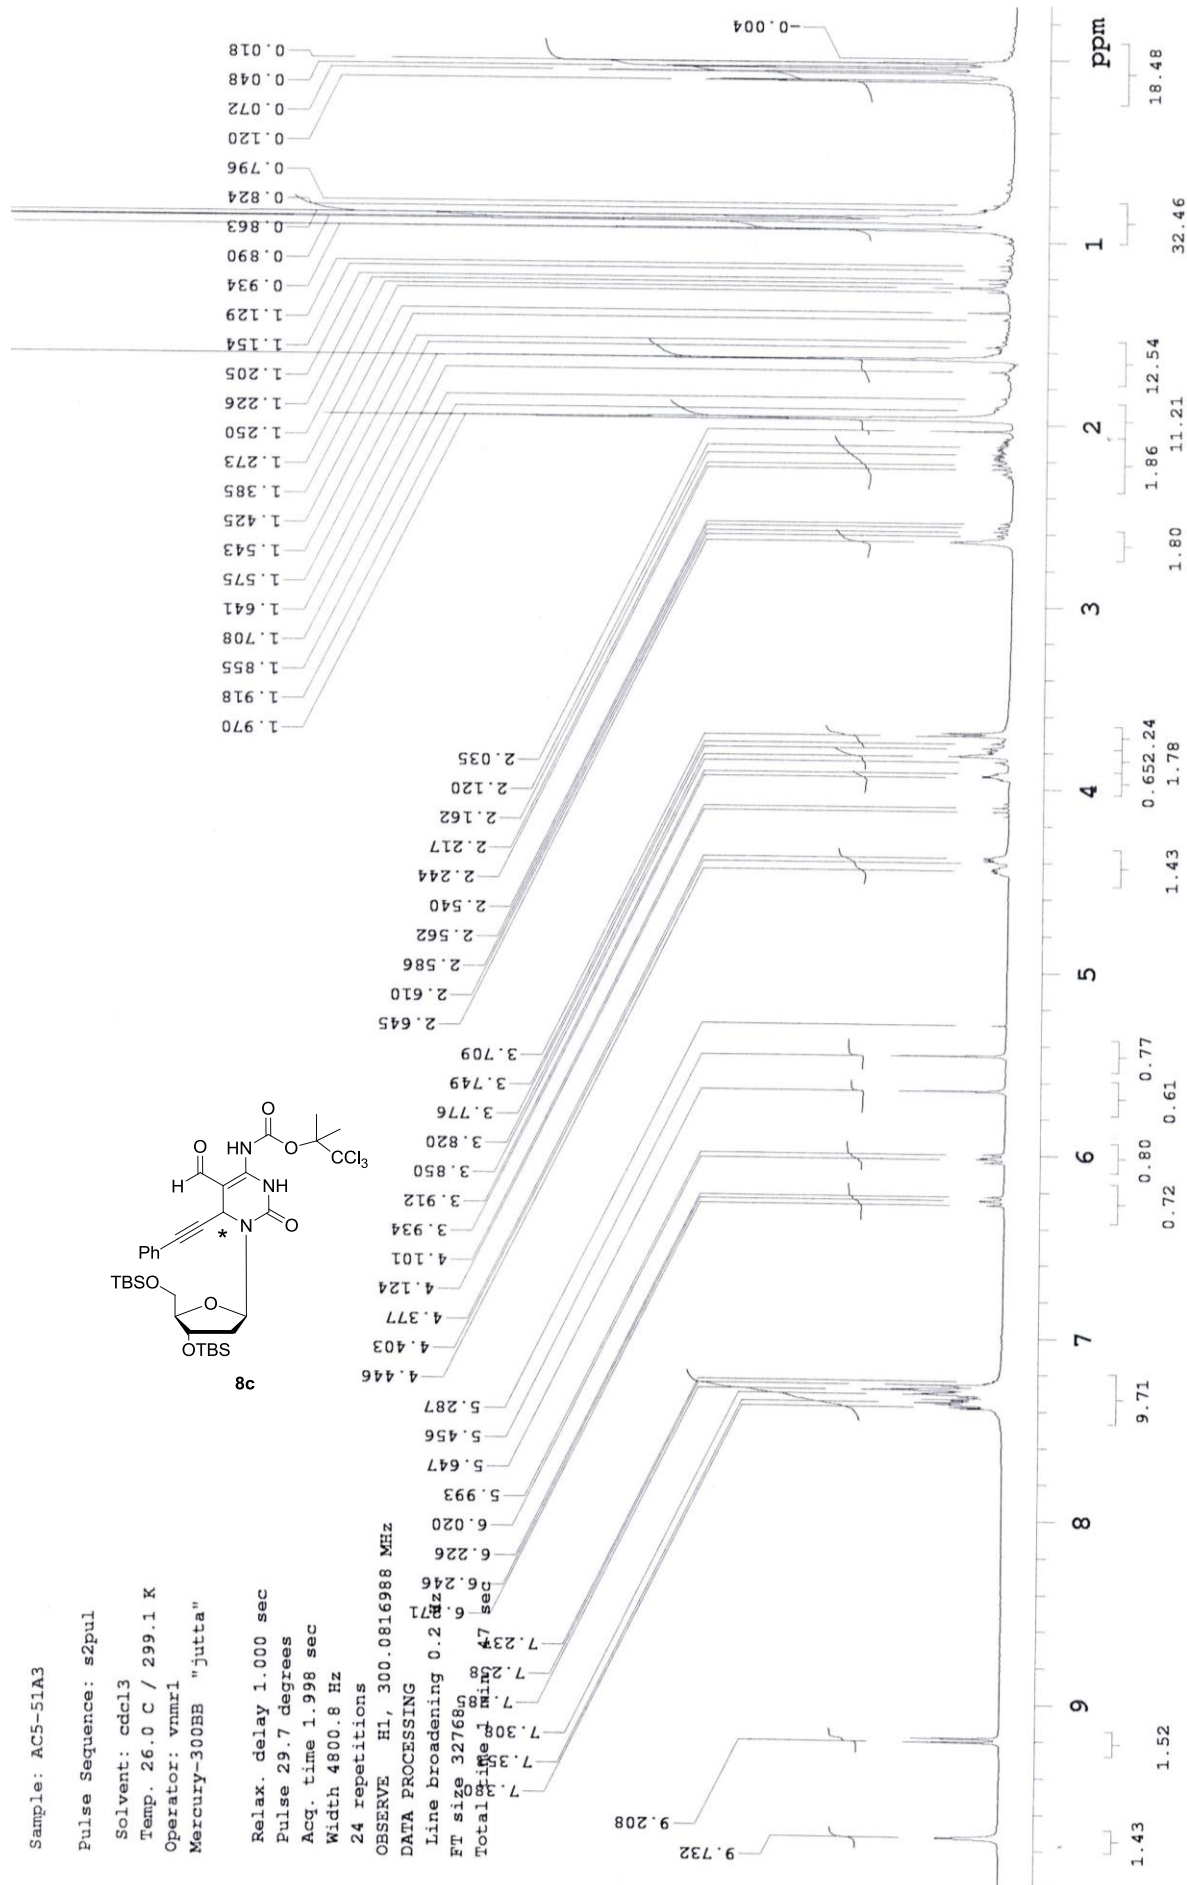







4.50  
4.64  
5.11  
5.20

18.14  
18.16  
18.63  
21.61  
21.66  
25.93  
26.14  
38.65  
39.13

51.09  
52.33

63.37  
72.11  
72.45  
76.84  
77.16  
77.48  
84.63  
86.18  
91.26  
93.16

105.08

114.34  
115.27

137.78  
138.22  
147.82  
147.96  
150.01  
150.28  
151.65

186.77  
186.87

| Parameter                 | Value           |
|---------------------------|-----------------|
| 1 Origin                  | Varian          |
| 2 Spectrometer            | mercury         |
| 3 Author                  | walkup          |
| 4 Solvent                 | cdcl3           |
| 5 Temperature             | 26.0            |
| 6 Pulse Sequence          | s2pul           |
| 7 Experiment              | 1D              |
| 8 Number of Scans         | 1376            |
| 9 Receiver Gain           | 20              |
| 10 Relaxation Delay       | 1.0000          |
| 11 Pulse Width            | 0.0000          |
| 12 Acquisition Time       | 1.3005          |
| 13 Spectrometer Frequency | 100.59          |
| 14 Spectral Width         | 24154.6         |
| 15 Lowest Frequency       | -1524.0         |
| 16 Nucleus                | <sup>13</sup> C |
| 17 Acquired Size          | 31413           |
| 18 Spectral Size          | 65536           |

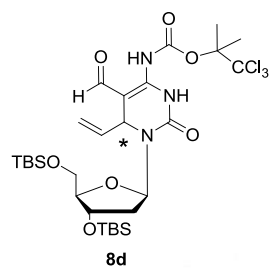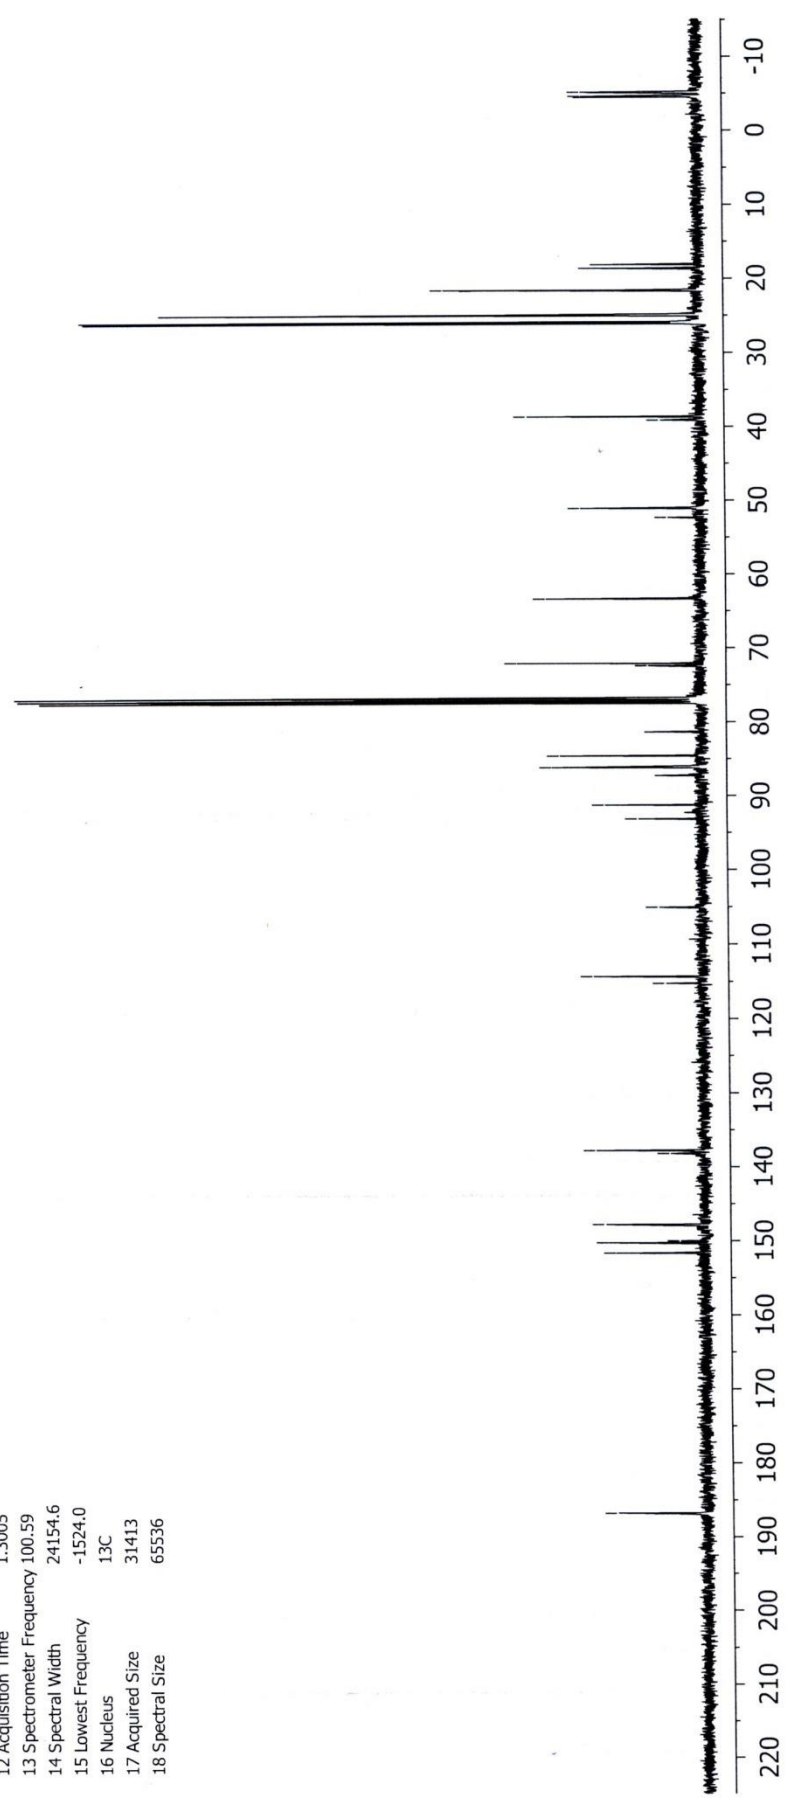

A. Chentsova

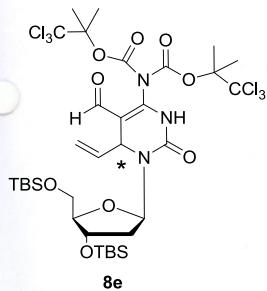

Sample: AC5-41A4

Pulse Sequence: s2pul

Date: Feb 18 2013

Solvent: cdcl3

Temp. 26.0 C / 299.1 K

Operator: walkup

Mercury-400B

"felix"

Relax. delay 1.000 sec

Pulse 20.7 degrees

Acq. time 1.996 sec

Width 6398.0 Hz

32 repetitions

OBSERVE H1, 399.9975357 MHz

DATA PROCESSING

Line broadening 0.2 Hz

FT size 32768

Total time 1 min, 50 sec

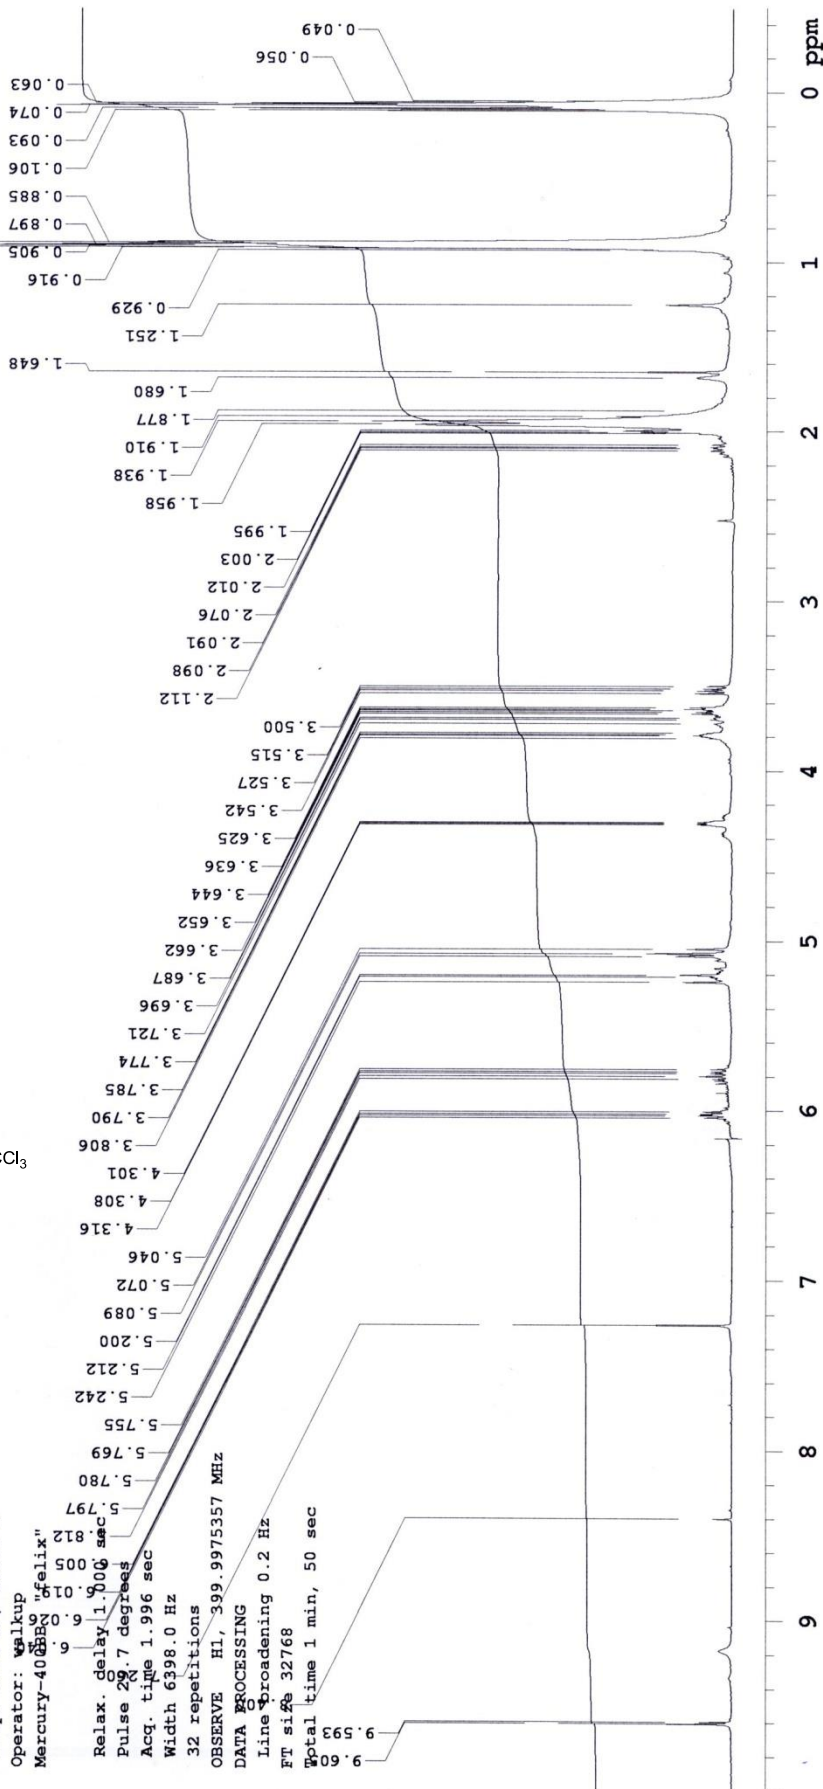



Sample: AC5-41A4

Pulse Sequence: s2pul

Solvent: cdcl3

Temp. 26.0 C / 299.1 K

Operator: vnmr1

Mercury-300BB "jutta"

Relax. delay 1.000 sec

Pulse 45.0 degrees

Acq. time 1.301 sec

Width 18115.9 Hz

1872 repetitions

BBSERVE C13, 75.

OBSERVE C13, 75.4333903 MHZ  
DECOUPLE H1, 300.0831467 MHZ

DECOUPLE HI, 300.083146 / MHz  
Power 37 dB

Power 37 dB  
continuously

continuously on  
WAL.TZ-16 modul at

DATA PROCESSING  
WINDOW 97-2.TTM

DATA PROCESSING

Line broadeni  
TT size 65536

RT size 65536

Total time 1 hr, 24 min, 1 sec

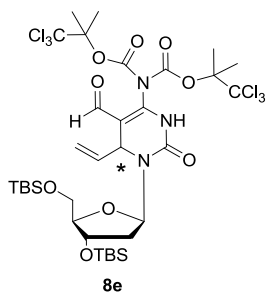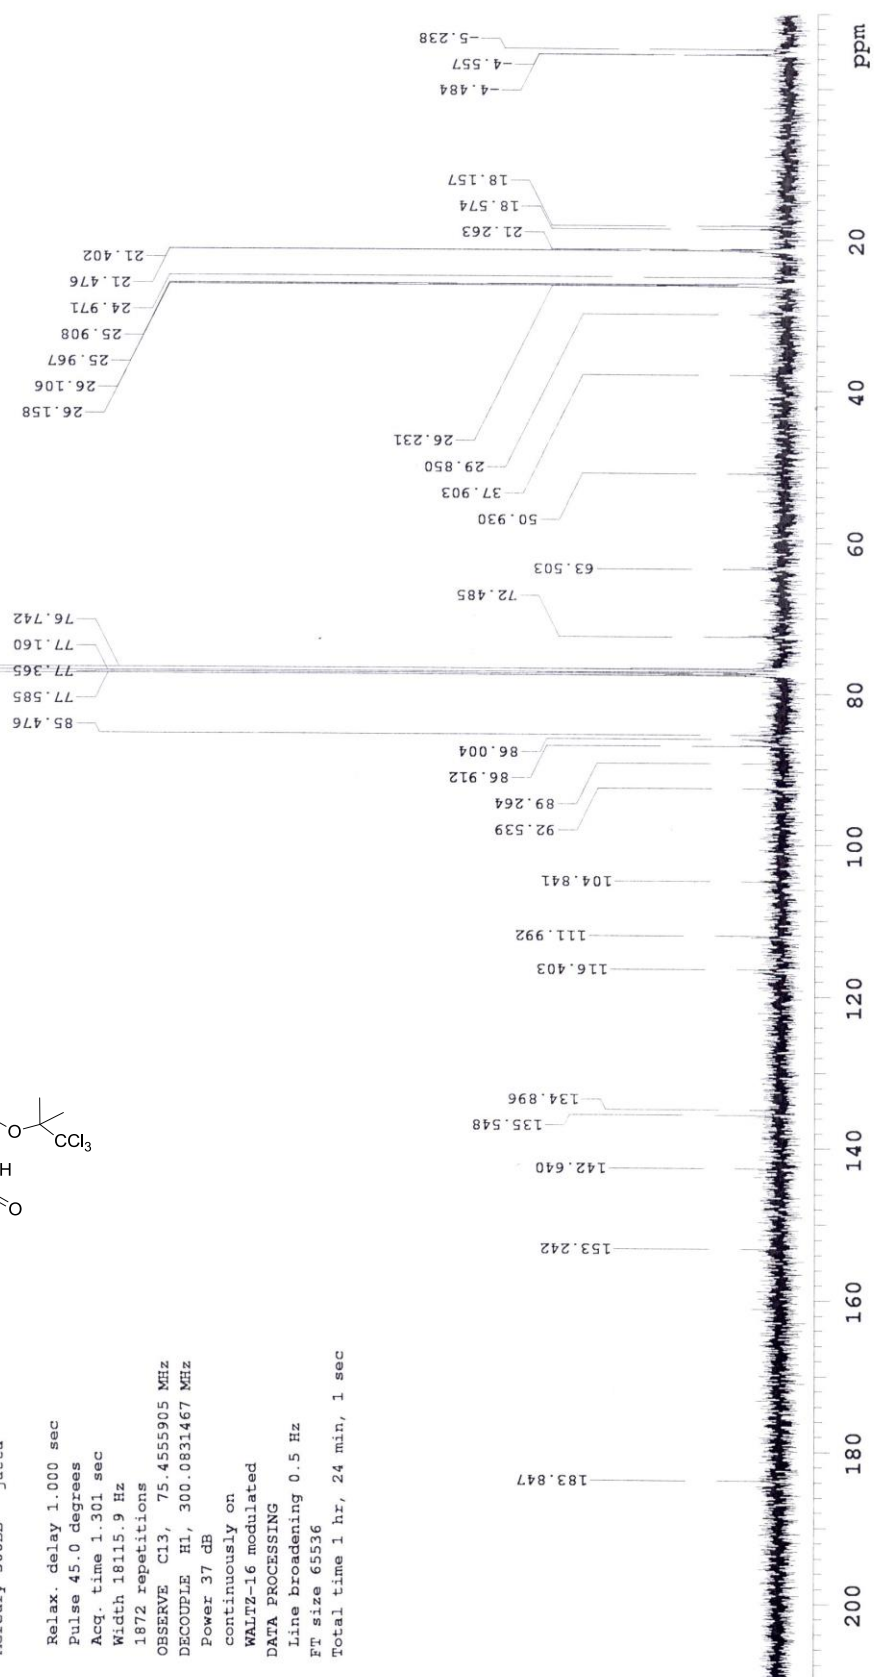

A. Chentsova

Sample: AC5-57A1

Pulse Sequence: s2pul

Solvent: cdcl3

Temp. 26.0 C / 299.1 K

Operator: vnmr1

Mercury-300BH "jutta"

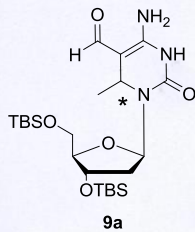

Relax. delay 1.000 sec  
Pulse 45.0 degrees  
Acq. time 1.098 sec  
Width 4800.8 Hz  
16 repetitions  
OBSERVE IN H1, 300.0816983 MHz  
DATA PROCESSING  
FT size 32768  
Total time 1 min, 47 sec

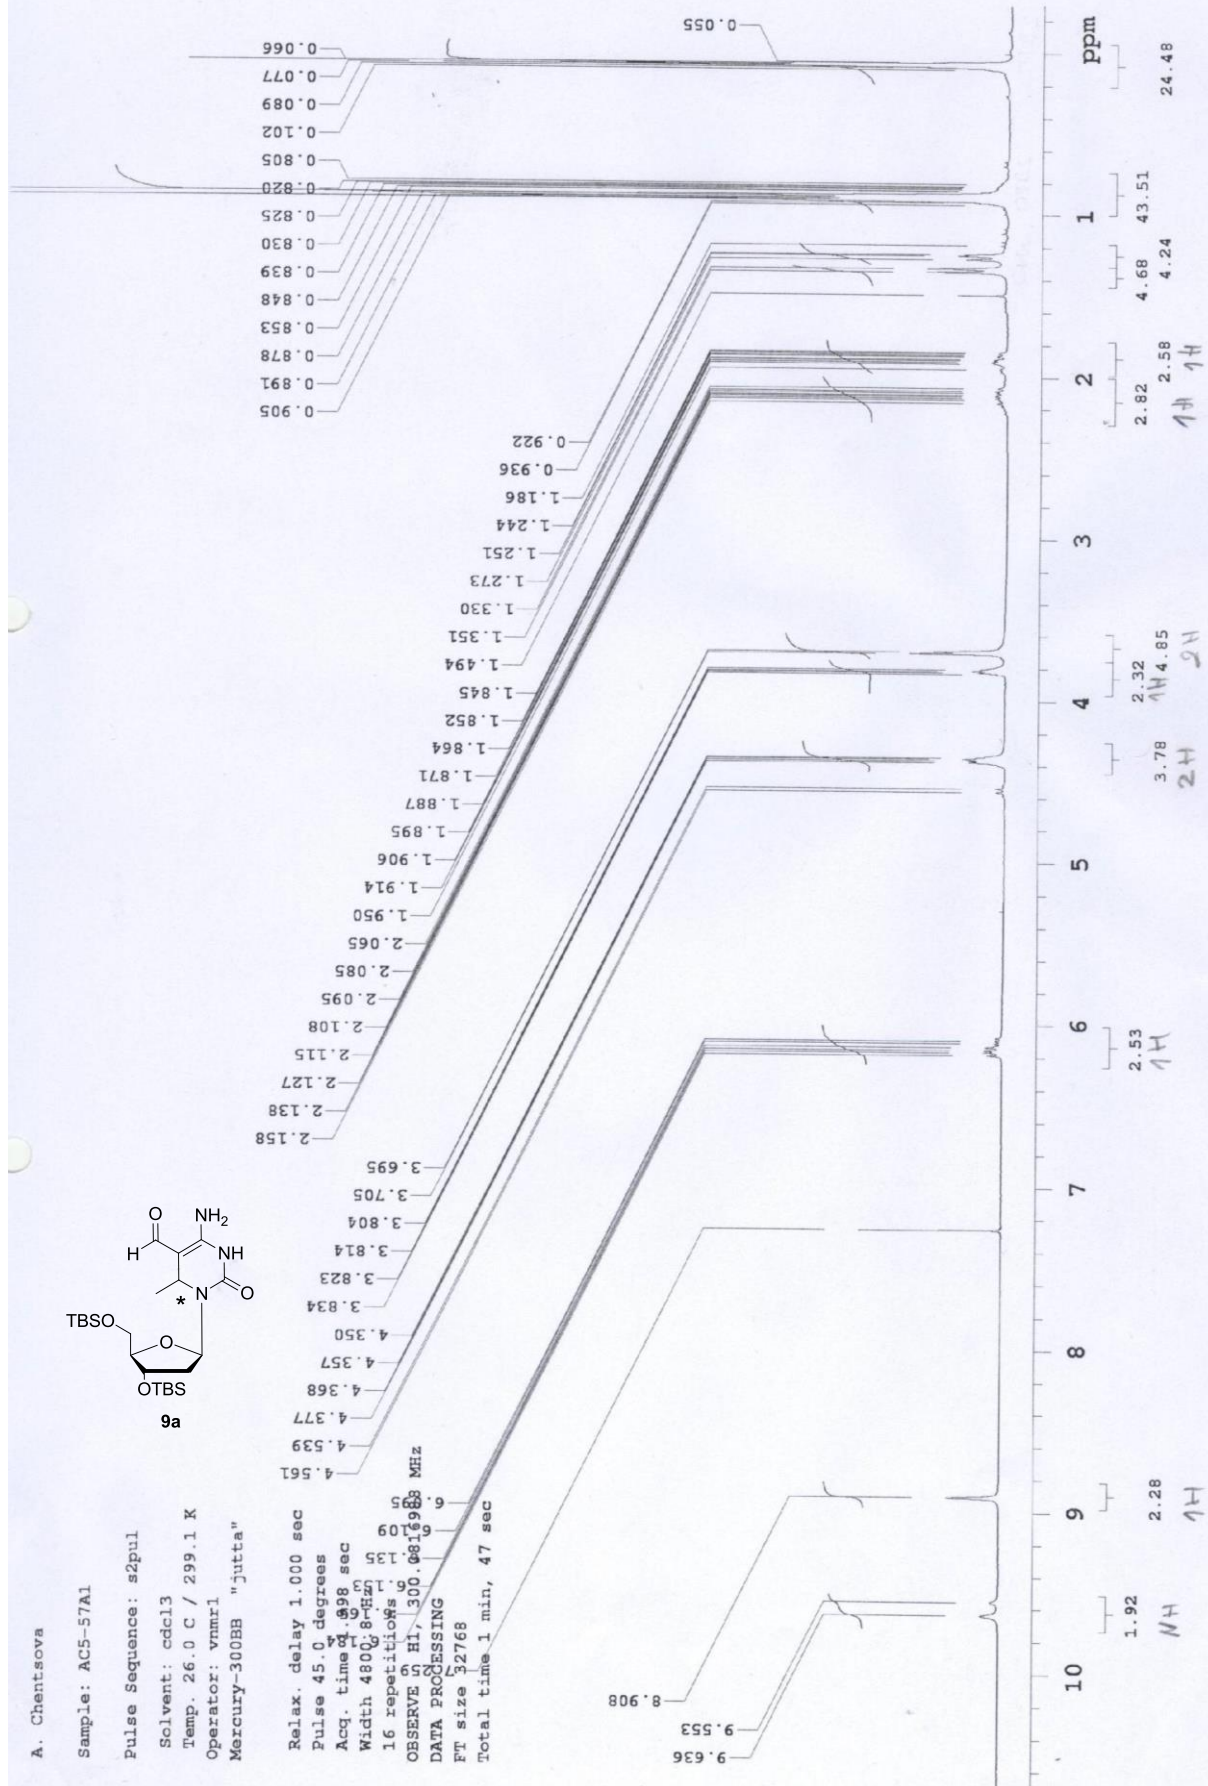

Chentsova

Sample: AC 5-57A1

Pulse Sequence: s2pul

Date: Apr 4 2013

Solvent: cdcl3

Temp. 26.0 C / 299.1 K

Operator: walkup

Mercury-400BB "felix"

Relax. delay 1.000 sec

Pulse 45.0 degrees

Acq. time 1.300 sec

Width 24154.6 Hz

736 repetitions

OBSERVE C13, 100.5794465 MHz

DECOUPLE H1, 399.9994929 MHz

Power 38 dB

continuously on

WALTZ-16 modulated

DATA PROCESSING

Line broadening 0.5 Hz

FT size 6536

Total time 42 min, 58 sec

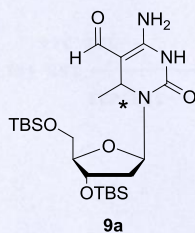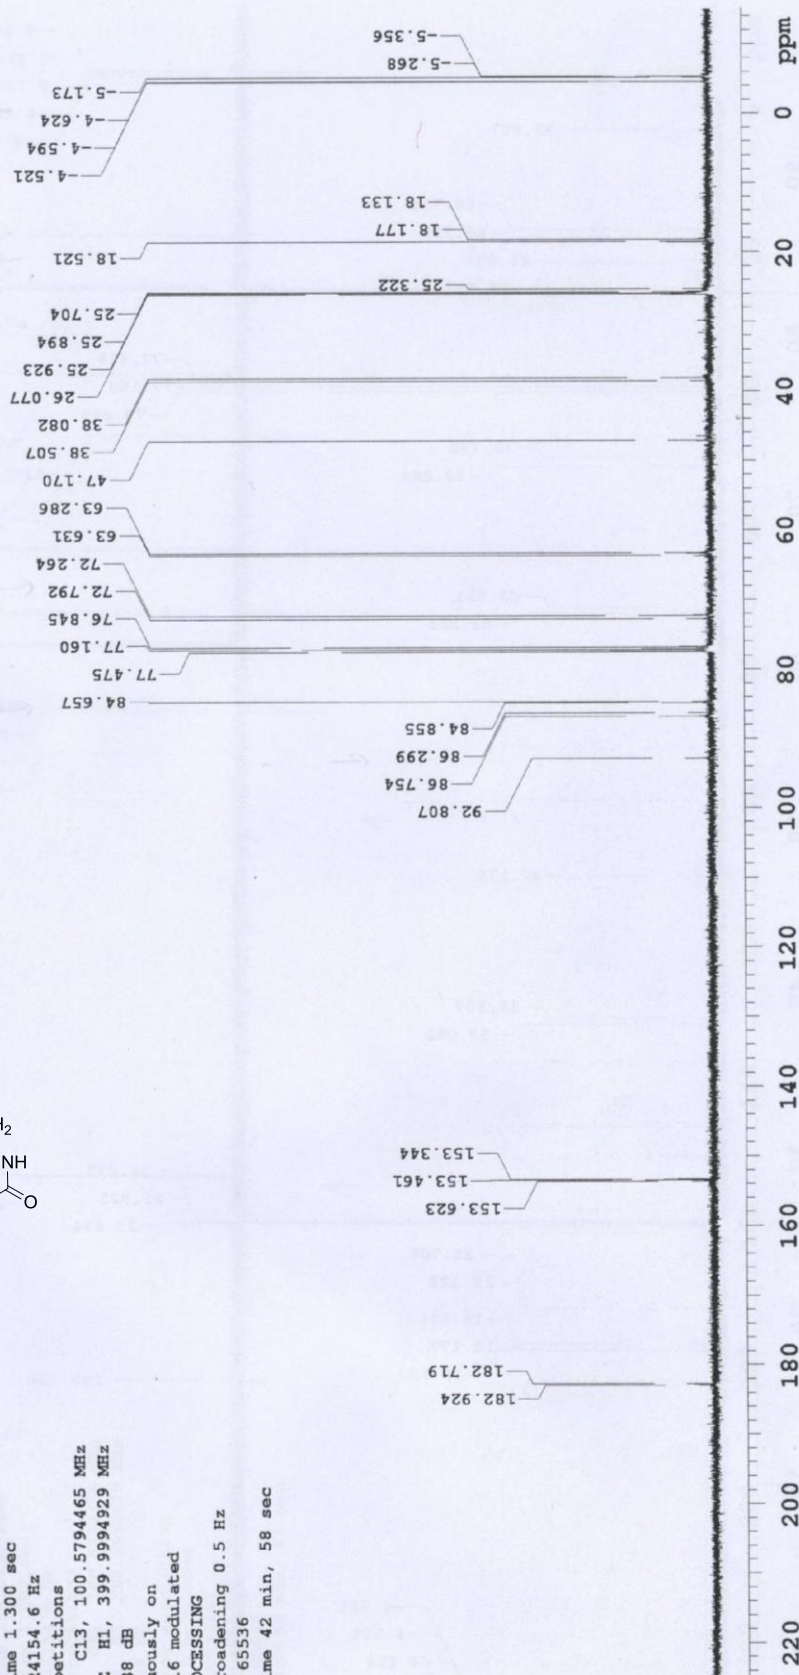



Sample: AC5-58

Date: Apr 11 2013

Date: Apr 11 2013

Temp. 26.0 C / 299.1 K

Mercury-400BB "felix"

Pulse 29.7 degrees

Width 7199.4 Hz

BSERVE H1, 399

Line broadening

total time 1 m

963

508

6—

二

—

—

3

9

2.02

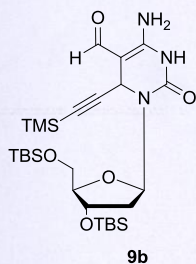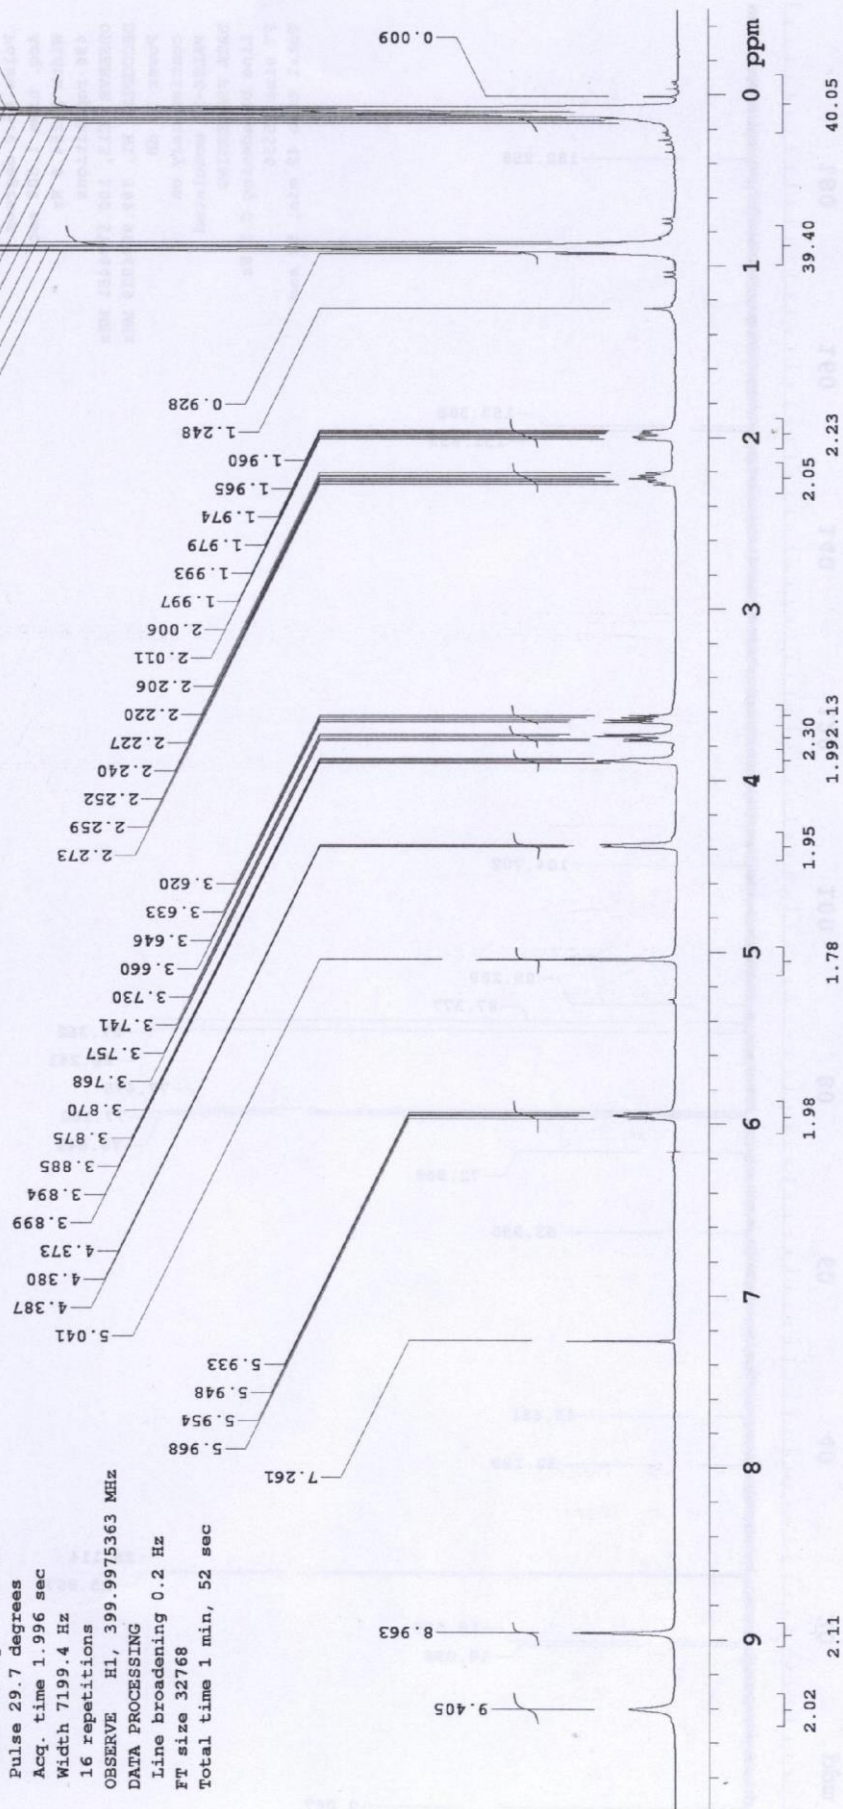

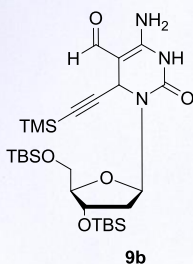

**9b**

A. Chentsova

Sample: AC5-58

Pulse Sequence: s2pul

Date: Apr 11 2013

Solvent: cdcl3

Temp. 26.0 C / 299.1 K

Operator: walkup

File: AC558C

Mercury-400BB "felix"

Relax. delay 1.000 sec

Pulse 45.0 degrees

Acq. time 1.300 sec

Width 24154.6 Hz

496 repetitions

OBSERVE C13, 100.5794451 MHz

DECOUPLE H1, 399.9994929 MHz

Power 38 dB

continuously on

WALTZ-16 modulated

DATA PROCESSING

Line broadening 0.5 Hz

FT size 65536

Total time 42 min, 58 sec

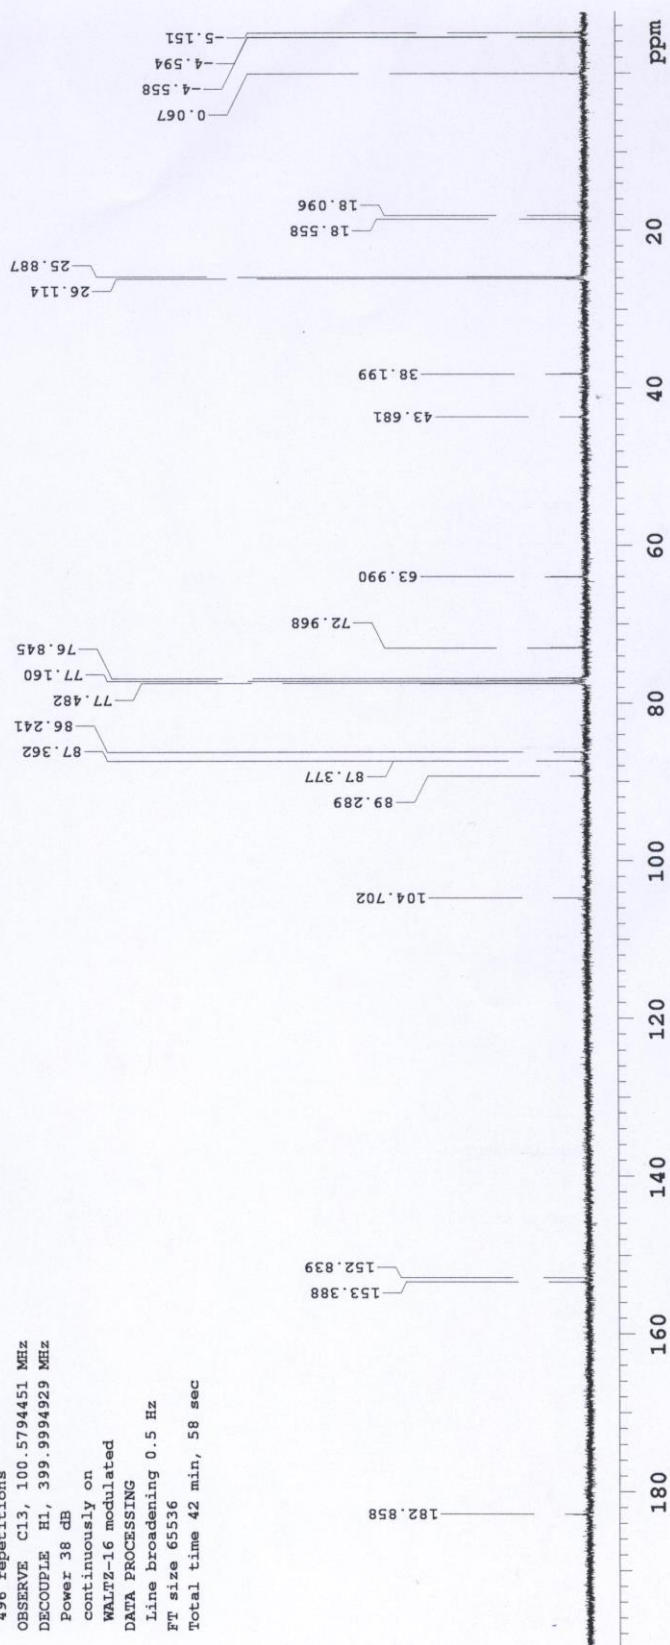



Std Proton parameters  
A. Chentsova

Sample: AC5-56

Pulse Sequence: s2pul

Solvent: cdcl3

Temp. 26.0 C / 299.1 K

Operator: vnmr1

Mercury-300EBB "jutta"

Relax. delay 1.000 sec

Pulse 45.0 degrees

Acq. time 2.000 sec

Width 4800.8 Hz

16 repetitions

OBSERVE H1, 300.0816981 MHz

DATA PROCESSING

Line broadening 0.2 Hz

FT size 32768

Total time 1 min, 11 sec

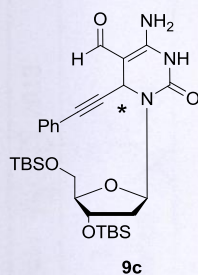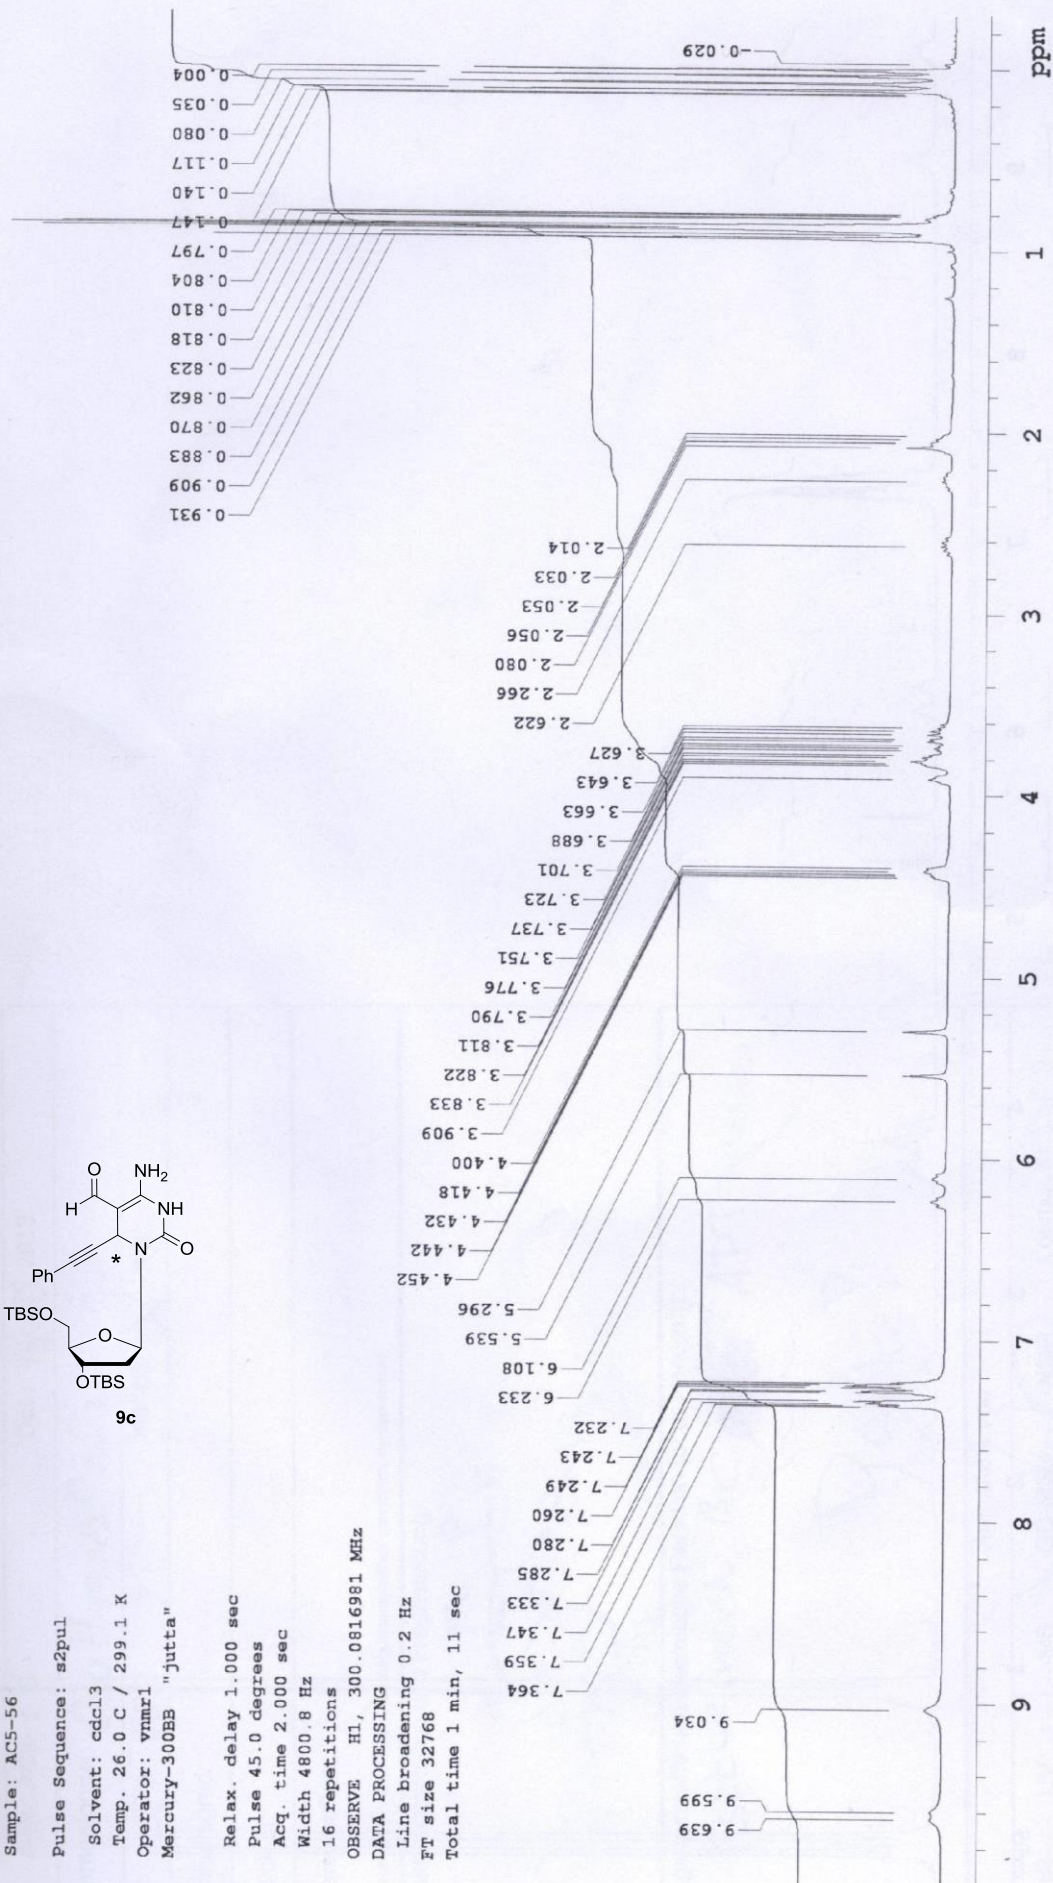

A. Chentsova

Sample: AC5-56

Pulse Sequence: s2pul

Date: Mar 14 2013

Solvent: cdcl3

Temp. 26.0 C / 299.1 K

Operator: walkup

Mercury-400BB "felix"

Relax. delay 1.000 sec

Pulse 45.0 degrees

Acq. time 1.300 sec

Width 24154.6 Hz

10000 repetitions

OBSERVE C13, 100.5794458 MHz

DECOUPLE H1, 399.9994929 MHz

Power 38 dB

continuously on

WALTZ-16 modulated

DATA PROCESSING

Line broadening 1.0 Hz

FT size 65536

Total time 6 hr, 49 min, 3 sec

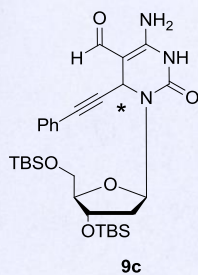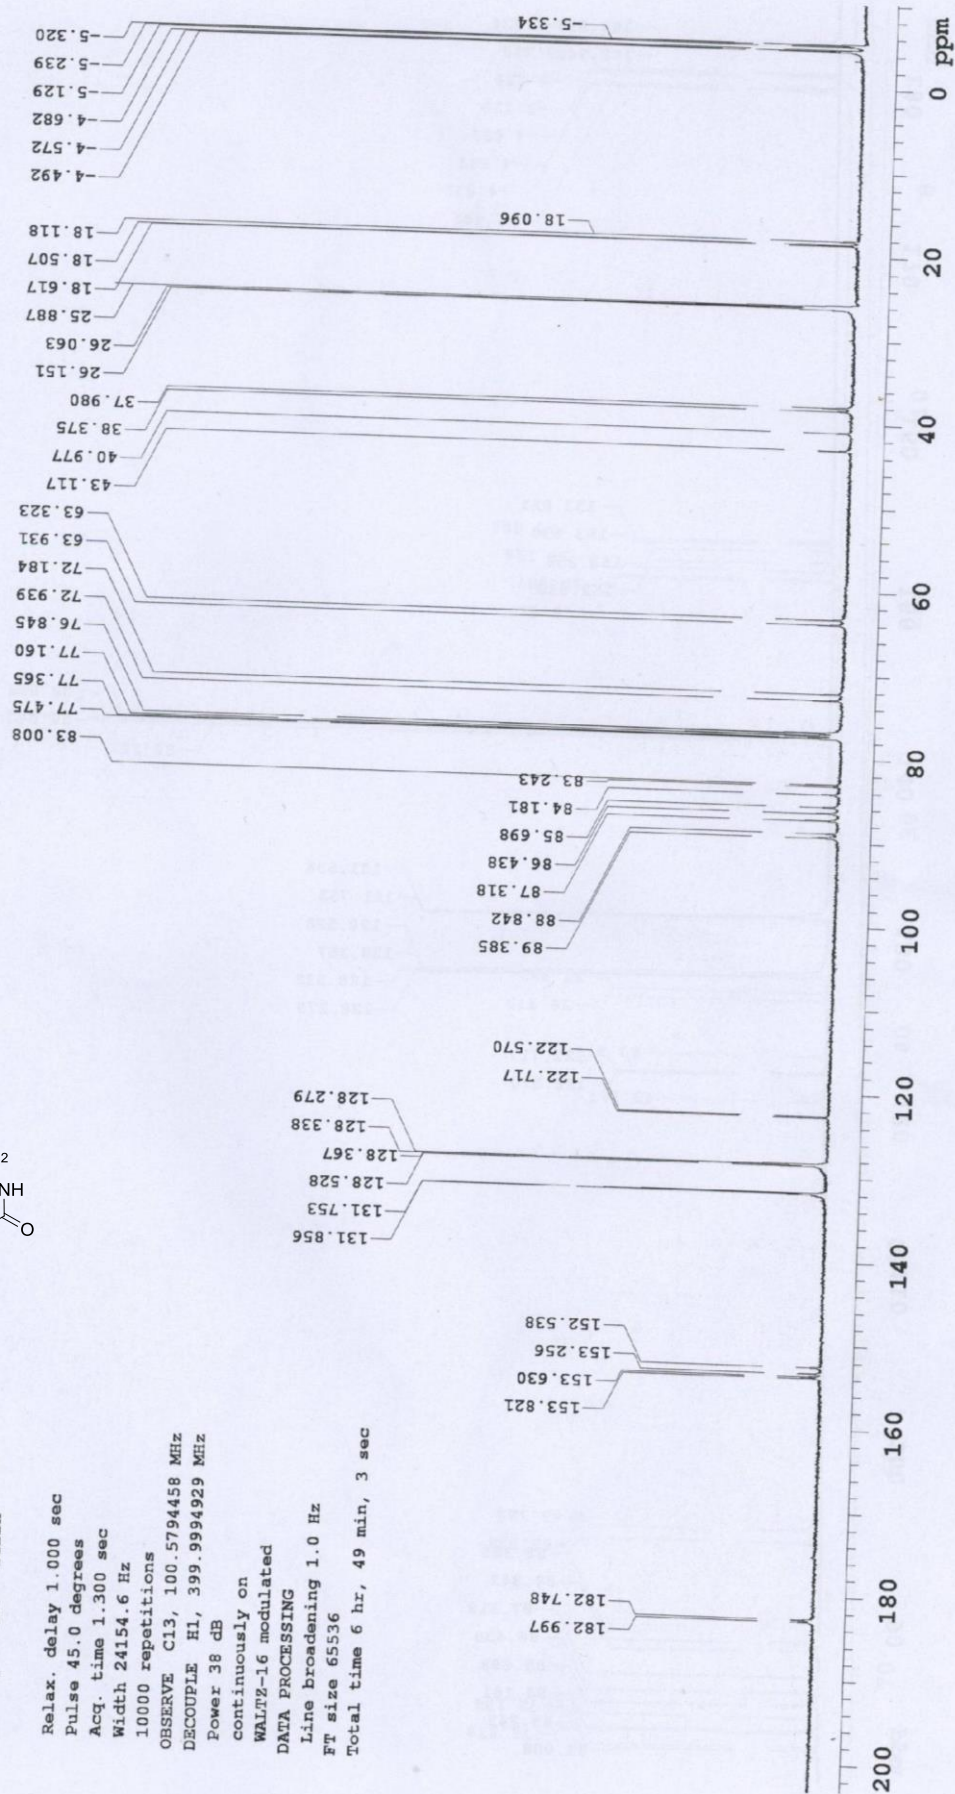



A. Chentsova

Sample: ACS-53B

Pulse Sequence: s2pul

Solvent: cdcl3

Temp. 26.0 C / 299.1 K

Operator: vnmr1

Mercury-300BB "jutta"

Relax. delay 1.000 sec

Pulse 29.7 degrees

Acq. time 1.998 sec

Width 4800.8 Hz

32 repetitions

OBSERVE F2 300.0816988 MHz

DATA PROCESSING

Line broadening 0.50 Hz

FT size 32768

Total time 1 min, 47 sec

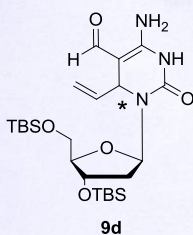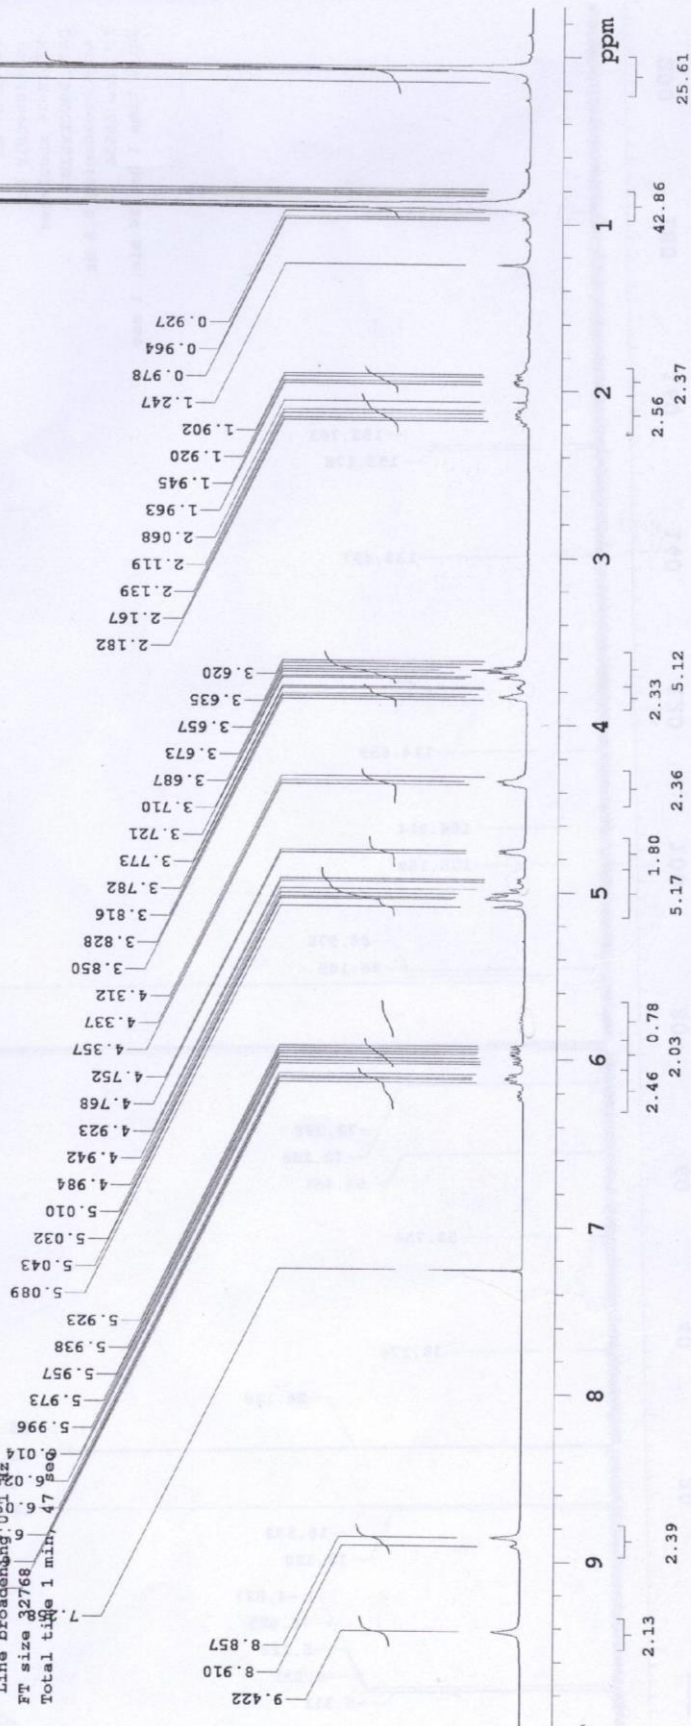

A. Chentsova

Sample: ACS-53B

Pulse Sequence: s2pul

Solvent: cdcl3

Temp. 26.0 C / 299.1 K

Operator: vmmrl

Mercury-300BB "jutta"

Relax. delay 1.000 sec

Pulse 45.0 degrees

Acq. time 1.301 sec

Width 18115.9 Hz

1696 repetitions

OBSERVE C13, 75.4555916 MHz

DECOUPLE H1, 300.0831467 MHz

Power 37 dB

continuously on

WALTZ-16 modulated

DATA PROCESSING

Line broadening 0.5 Hz

FT size 65536

Total time 1 hr, 24 min, 1 sec

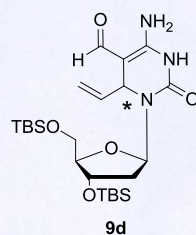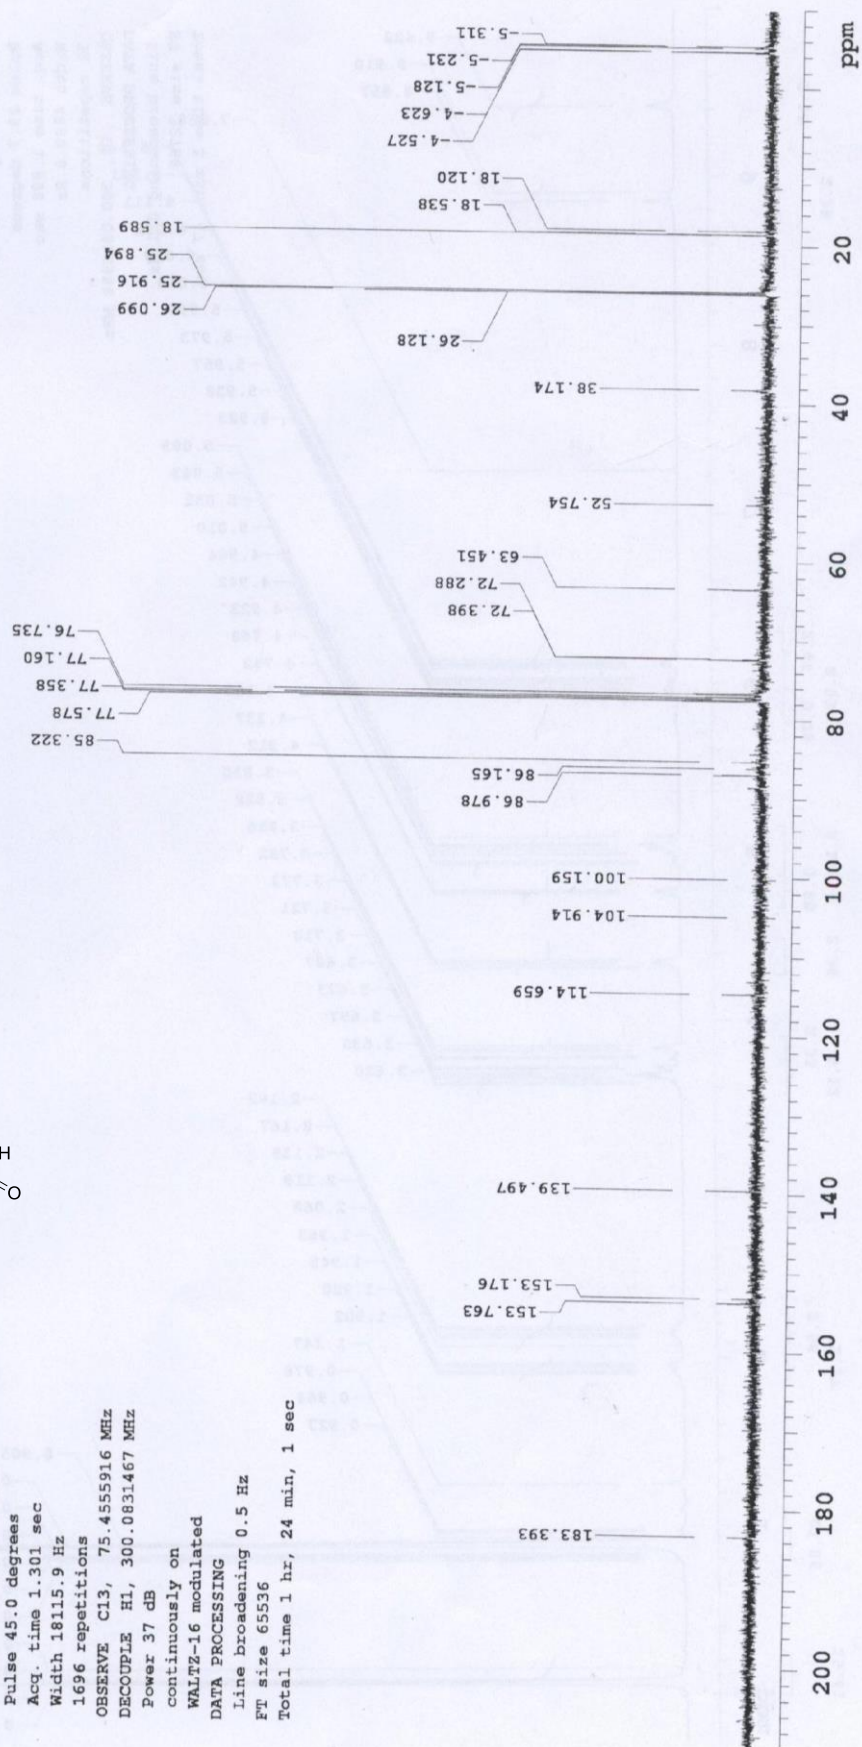

Supplement: Additional file 1 [file 1860-5397-10-2-S1.pdf]
